# Supplementary material for: Lineage-Specific Changes in Biomarkers in Great Apes and Humans
Source: PLoS One. 2015 Aug 6;10(8):e0134548. doi: 10.1371/journal.pone.0134548 (PMC4527672; doi:10.1371/journal.pone.0134548)
Supplement: S1 Dataset — Alignment scores were derived from the NCBI and UniProt websites. (XLSX) [file pone.0134548.s001.xlsx]

## Sheet: All biomarkers
NCBI - Homologene/Uniprot - pairwise alignment scores for Proteins 21.11.2013				Pairwise alignment scores		Protein Identifer
				% identity		human	chimpanzee	macaque
Metabolite	Method of detection	Subunits	Gene name	H. sapiens vs. P. troglodytes verus	H. sapiens vs. M. mulatta
Alanine transaminase	catalytic activity by using a uv-photometric test		median	0.989065	0.985
		Alanine transaminase 1	GPT1	0.98004	0.974	NP_005300.1	H2QZJ9_PANTR	XP_001093616.1
		Alanine transaminase 2	GPT2	0.99809	0.996	NP_597700.1	K7C2S9_PANTR	XP_001113757.2
Albumin	colorimetric test		ALB	0.989	0.937	NP_000468.1	XP_517233.3	XP_001103956.1
Apolipoprotein A-I	immunoturbidimetric assays		APOA1	1	0.951	NP_000030.1	XP_001153383.1	XP_001153383.1
Apolipoprotein B-100	immunoturbidimetric assays		APOB	0.986	0.946	NP_000375.2	XP_515323.2	XP_001097500.1
Aspartate transaminase	catalytic activity by using a uv-photometric test		median	0.998	0.982105
		Aspartate transaminase 1	GOT1	0.998	0.97821	NP_002070.1	NP_001092011.1	H9EVG6_MACMU
		Aspartate transaminase 2	GOT2	0.998	0.986	NP_002071.2	XP_523381.2	XP_001103601.1
Bilirubin	colorimetric test
Cholinesterase	catalytic activity by using a enzymatic colorimetric test		BCHE	0.992	0.958	NP_000046.1	XP_516857.2	XP_002808379.1
Cholesterol	enzymatic colorimetric test
Colloid-osmotic pressure	Direct pressure measurement via difference in hydrostatic pressure
C-reactive protein	immunoturbidimetric assays		CRP	0.991	0.915	NP_000558.2	XP_001170732.2	XP_001170732.2
Creatine kinase	catalytic activity by using a uv-photometric test		median	1	0.993375
		Creatine kinase, brain	CKB	1	0.992	NP_001814.2	XP_510185.3	XP_001112108.1
		Creatine kinase, muscle	CKM	1	0.99475	NP_001815.2	XP_001163660.2	G7NMC0_MACMU
Creatinine	enzymatic colorimetric test
Ferritin	ElektroChemiLuminescence ImmunoAssay		median	0.997	0.983
		Ferritin, light polypeptide	FTL	0.994	0.971	NP_000137.2	XP_001155938.2	XP_002801381.1
		Ferritin, heavy polypeptide 1	FTH1	1	0.995	NP_002023.2	XP_001140124.2	XP_002799572.1
Folate	ElektroChemiLuminescence ImmunoAssay		Folate
Gamma-glutamyl transpeptidase	catalytic activity by using a enzymatic colorimetric test		median	0.976925	0.937
		Gamma-glutamyl transpeptidase 1	GGT1	0.989	0.961	NP_001027536.1	XP_001171042.1	XP_001093671.1
		Gamma-glutamyl transpeptidase 2	GGT2	0.96485	0.913	XP_001129377.1	H2R716_PANTR	XP_001090518.1
Glucose	uv-photometric test with Hexokinase
Glutamate dehydrogenase	catalytic activity by using a uv-photometric test		median	0.9935	0.9705
		Glutamate dehydrogenase 1	GLUD1	0.998	0.994	NP_005262.1	XP_001137904.1	XP_002805686.1
		Glutamate dehydrogenase 2	GLUD2	0.989	0.947	NP_036216.2	NP_001009004.1	XP_002805925.1
High-density lipoprotein	homogenous enzymatic colorimetric test		median	0.986	0.872
		Apolipoprotein A-I	APOA1	1	0.951	NP_000030.1	XP_001153383.1	XP_001153383.1
		Apolipoprotein A-II	APOA2	0.97	0.93	NP_001634.1	NP_001008976.1	XP_001117975.1
		Apolipoprotein C-I	APOC1	0.988	0.86747	NP_001636.1	XP_003316492.1	H9FNA4_MACMU
		Apolipoprotein C-II	APOC2	0.9901	0.871	NP_000474.2	H2R605_PANTR	XP_001102868.2
		Apolipoprotein C-III	APOC3	0.97	0.859	NP_000031.1	XP_529442.3	XP_001090312.1
		Apolipoprotein D	APOD	0.984	0.873	NP_001638.1	XP_516965.1	XP_001098104.2
Lactate Dehydrogenase	catalytic activity by using a uv-photometric test		median	0.997	0.989
		Lactate dehydrogenase A	LDHA	0.997	0.989	NP_001158886.1	NP_001029268.1	XP_001084747.1
		Lactate dehydrogenase B	LDHB	0.997	0.997	NP_001167568.1	NP_001092031.1	XP_001081996.1
		Lactate dehydrogenase C	LDHC	1	0.973	NP_002292.1	XP_003312994.1	XP_001082436.2
Low-density lipoprotein	homogeneous enzymatic colorimetric test		median	0.978	0.9025
		Apolipoprotein B-100	APOB	0.986	0.946	NP_000375.2	XP_515323.2	XP_001097500.1
		Apolipoprotein C-III	APOC3	0.97	0.859	NP_000031.1	XP_529442.3	XP_001090312.1
Lipase	catalytic activity by using a enzymatic colorimetric test		Lipase	0.989	0.938	NP_000927.1	XP_001151144.1	XP_001095070.1
Lipoprotein(a)	immunoturbidimetric assays and with a double-antibody ELISA		LPA	0.951	0.892	NP_005568.2	XP_518843.3	XP_001098061.2
NT-proBNP	ElektroChemiLuminescence ImmunoAssay		NTProBNP	0.978	0.906	NP_002512.1	XP_525186.2	XP_001115574.2
Phosphate	photometric test		Phosphate
Protein	colorimetric test		Protein
Thyroid-stimulating hormone	ElektroChemiLuminescence ImmunoAssay		median	0.9685	0.9065
		Glycoprotein hormones alpha chain	CGA	0.966	0.835	NP_000726.1	XP_001153293.1	XP_001090917.1
		Thyrotropin subunit beta	TSHB	0.971	0.978	NP_000540.2	XP_001160337.1	XP_001111873.2
Free thyroxine	ElektroChemiLuminescence ImmunoAssay
Triglycerides	enzymatic colorimetric test
Free triiodothyronine	ElektroChemiLuminescence ImmunoAssay
Troponin T	ElektroChemiLuminescence ImmunoAssay	Troponin T, cardiac muscle	TNNT2	0.997	0.976	NP_000355.2	XP_001145686.1	XP_002802029.1
Urea	enzymatic colorimetric test
Uric Acid	enzymatic colorimetric test
Vitamin B12	ElektroChemiLuminescence ImmunoAssay
		proteins	median	0.989065	0.946
			mean	0.98721	0.944209
			min	0.951	0.872
			max	1	0.993375
