# Supplementary material for: Lineage-Specific Changes in Biomarkers in Great Apes and Humans
Source: PLoS One. 2015 Aug 6;10(8):e0134548. doi: 10.1371/journal.pone.0134548 (PMC4527672; doi:10.1371/journal.pone.0134548)
Supplement: S2 Dataset — (XLSX) [file pone.0134548.s002.xlsx]

## Sheet: sign.levels for gender
higher values in females	higher values in males			Rh - DE	B - CD	B - DE	Ch - CG	Ch - SL	Ch - DE	H - DE
		* < 0.05	Age [a]
		** <0.01	Alanine transaminase [µkat/L]
		*** < 0.001	Albumin [g/L]
			Apolipoprotein A [g/L]
no significant difference			Apolipoprotein B [g/L]
			Aspartate transaminase [µkat/L]
not determined			Bilirubin [µmol/L]
			Cholinesterase [µkat/L]
			Cholesterol [mmol/L]
			Colloid osmotic pressure [mmHg]
			C-reactive protein [mg/L]
			Creatinine kinase [µmol/L]
			Creatinine [µmol/L]
			Gamma-glutamyl transpeptidase [µkat/L]
			Glutamate dehydrogenase [µkat/L]
			High-density lipoprotein [mmol/L]
			Lactate dehydrogenase [µkat/L]
			Lipase [µkat/L]
			Lipoprotein (a) [mg/dl]
			Low-density lipoprotein [mmol/L]
			N-terminal prohormone of brain natriuretic peptide [pg/mL]
			Total Protein [g/L]
			Thyroid-stimulating hormone [mU/L]
			free Thyroxine [pmol/L]
			Triglycerides [mmol/L]
			free Triiodothyronine [pmol/L]
			Urea [mmol/L]
			Uric acid [µmol/L]
			Ferritin [ng/ml]
			Folic acid [nmol/L]
			Glucose [mmol/L]
			Phosphate [mMol/L]
			Troponin T [µg/L]
			Vitamine B12 [pmol/L]
			BMI
			Height [cm]
			Weight [kg]
			n (individuals)	20	50	11	121	76	19	312
			percentage of significantly different biomarkers between male and female individuals of total number of biomarkers (Wilcoxon rank-sum test, P < 0.01)	0	0.121212	0	0.0909091	0.030303	0.030303	0.666667

## Sheet: mean values + exact sig. level
higher values in females	higher values in males			Rh - DE			B - CD			B - DE			Ch - CG			Ch - SL			Ch - DE			H - DE
				male	female	P	male	female	P	male	female	P	male	female	P	male	female	P	male	female	P	male	female	P
		* < 0.05	Age [a]
		** <0.01	Alanine transaminase [µkat/L]																			0.2204	0.165	5.94892e-09
		*** < 0.001	Albumin [g/L]																			44.868	42.398	1.13253e-17
			Apolipoprotein A [g/L]				2.00536	2.30364	0.000954034													1.45106	1.73761	8.88101e-17
no significant difference			Apolipoprotein B [g/L]				0.740714	0.943636	0.000886822													0.778167	0.711993	0.00164322
			Aspartate transaminase [µkat/L]																			0.462733	0.395667	1.33803e-09
not determined			Bilirubin [µmol/L]																			5.42593	3.48187	6.43394e-11
			Cholinesterase [µkat/L]													217.665	190.05	0.00253518				141.119	114.862	2.83161e-17
			Cholesterol [mmol/L]				5.21464	6.62955	1.56126e-05
			Colloid osmotic pressure [mmHg]
			C-reactive protein [mg/L]																			1.00733	2.62207	1.0818e-08
			Creatinine kinase [µmol/L]										3.87127	3.26236	5.20589e-05							1.75673	1.1914	3.1093e-12
			Creatinine [µmol/L]																			78.22	61.3667	3.01808e-33
			Gamma-glutamyl transpeptidase [µkat/L]																			0.446867	0.3072	2.1863e-08
			Glutamate dehydrogenase [µkat/L]																			0.06458	0.0397467	2.19547e-11
			High-density lipoprotein [mmol/L]																			1.3286	1.65687	5.65487e-16
			Lactate dehydrogenase [µkat/L]																7.93333	5.24769	0.00214272
			Lipase [µkat/L]																			0.5562	0.643733	0.0186127
			Lipoprotein (a) [mg/dl]
			Low-density lipoprotein [mmol/L]				2.70893	3.73636	0.000388897													2.96173	2.64887	0.000131089
			N-terminal prohormone of brain natriuretic peptide [pg/mL]																			29.7753	59.4487	3.49637e-19
			Total Protein [g/L]																			72.4853	71.276	0.0073097
			Thyroid-stimulating hormone [mU/L]
			free Thyroxine [pmol/L]																			17.2444	15.9055	4.34422e-08
			Triglycerides [mmol/L]																			1.6248	1.25467	0.000271811
			free Triiodothyronine [pmol/L]																			5.37567	4.89747	5.89444e-13
			Urea [mmol/L]																			5.1284	4.06293	4.52763e-14
			Uric acid [µmol/L]										158.722	130.236	0.000152298							309.567	220.233	1.30243e-31
			Ferritin [ng/ml]										154.2	98.8055	0.00142692							50.0547	27.3709	2.79228e-06
			Folic acid [nmol/L]
			Glucose [mmol/L]
			Phosphate [mMol/L]																			1.26287	1.32087	0.0209271
			Troponin T [µg/L]
			Vitamine B12 [pmol/L]
			BMI																			23.774	23.0098	0.000222607
			Height [cm]																			180.547	167.873	1.32997e-33
			Weight [kg]																			77.6067	64.7467	3.14954e-22
			n (individuals)	20			50			11			121			76			19			312
			percentage of significantly different biomarkers between male and female individuals of total number of biomarkers (Wilcoxon rank-sum test, P < 0.01)	0			0.121212			0			0.0909091			0.030303			0.030303			0.666667
