# Supplementary material for: Lineage-Specific Changes in Biomarkers in Great Apes and Humans
Source: PLoS One. 2015 Aug 6;10(8):e0134548. doi: 10.1371/journal.pone.0134548 (PMC4527672; doi:10.1371/journal.pone.0134548)
Supplement: S4 Dataset — (XLSX) [file pone.0134548.s004.xlsx]

## Sheet: Data sheet
Name	Species	Gender	Age_a	ALT_µkatL	ALB_gl	APOA_gl	APOB_gl	AST_µkatL	BILI_µmolL	CHE_µkatL	Chol_mmolL	MEAN_COP	CRP_mgl	CK_µkatl	CRE_µmolL	GGTI_µkatL	GLDH_µkatL	HDL_mmolL	LDH_µkatL	LIP_µkatl	LPA_I_mgdl	LDL_C_mmolL	NTPROBNP_pmolL	PROT_gL	TSH_mUL	FT4_pmoll	TG_mmolL	FT3_pmolL	HSTmmolL	HRSµmolL	FERRTIN_ngml	FOLS_nmolL	GLU_mmolL	P_mMolL	TROP_T_µgL	VB12_pmolL	BMI	Height_cm	Weight_kg
1	1	1	1	0.15	47.6	1.37	0.39	1.29	1.71	249.8	3.16	27.7	0.96	46.96	73	1.51	0.286	0.93		0.19	34.4	1.76	5	66	0.005	24.37	0.82	11.5	5.6	11.9
2	1	1	1	0.07	42.9	1.33	0.42				3.41	25.4	0.3	85.16	81			0.74	9.61	0.05	27	1.96	5	61.4	0.005	21.43	0.87	6.73	7
3	1	1	2	0.08	44	1.4	0.35	1.05	1.71	209.1	2.87	25.9	0.71	18.97	74	2.15	0.29	0.74	6.14	0.31	86.9	1.55	5	67	0.006	17.3	0.6	4.78	11.6	11.9
4	1	2	2	0.1	42.3	1.29	0.42	1.23	1.71	188.8	3.12	24.8	0.87	38.39	52	3.02	0.315	0.93	8.07	0.71	37.3	1.85	5	63	0.005	15.66	0.68	3.78	8.8	11.9
5	1	2	6		34.4							25.2	17.75		118				9.75				5	67.5	0.005	11.07		1.71	13.2
6	1	2	12		44.3							29	1.85		105								5	72	0.005	17.6		13.67	6.8
7	1	2	1	0.11	43.8	1.5	0.43	1.27	1.71	201.2	3.63	24.6	0.88	63.63	75	1.66	0.193	0.89		0.18	34.9	1.92	5	61.6	0.006	10.12	0.67	6.44	7.6	11.9
8	1	2	1	0.11	39.4	1.17	0.37	1.63	1.71	289.8	2.89	22.3	1.11	86.4	52	1.95	0.285	0.83		0.23	28.8	1.6	5	58.4	0.007	18.6	0.71	5.24	7.9	11.9
9	1	2	22	0.08	38	1.53	0.47	0.87	1.71	150.2	3.98	23.6	1.11	21.18	70	0.72	0.198	0.7		0.21	92.1	2	6.3	63.2	0.005	7.92	1.01	4.85	5.9	11.9
10	1	2	8	0.15	41.2	1.53	0.38	1.66	1.71	136.9	4.39	26.5	0.69	41.15	100	0.87	0.267	1.29	12.84	0.28	116.1	2.5	5	68.1	0.005	8.63	0.44	7.12	7	11.9
11	1	2	20	0.1	36.9	0.8	0.2	0.87			1.84	27	0.98	29.82	70	0.73		0.46		0.12	9.9	0.42	5	67.8	0.005	13.37	0.88	7.46	4.3
12	1	2	7	0.08	45	1.4	0.31	1.11	1.71	448.9	4.35	28.6	23.74	57.6	88	0.77	0.24	0.61		0.22	115	2.41	5	68.4	0.005	22.45	0.69	17.37	7	11.9
13	1	2	5		46	1.65	0.36				4.01	28.2	0.8	30.92	74			1.06			74.4	2.03	5	70.7	0.005	9.5	0.64	7.27	5.7
14	1	2	19		36.1							24.9	27.09		78								5	73.5	0.005	11.3		6.04	5
15	1	2	2		42.2							25	0.8		66				9.95				9.7	60.7	0.005	16.67		8.48	7.6
16	1	2	3		46.9	1.44	0.34				3.42	29.2	2.73	42.28	98			0.97	7.6		48.6	1.89	5	68.8	0.005	13.42	0.55	3.14	10.7
17	1	2	4		42.7							27.8	2.8		90				9.48					74	0.005	10.27		5.37	8.8
18	1	2	1	0.13	47	2.08	0.3	1.17	1.71	163.8	4.03	26.3	1.25	42.53	57	3.4	0.236	0.81		0.58	13.6	1.81	5	64.1	0.005	14.58	0.77	2.87	9	11.9
19	1	2	2		45.6							27	3.28		77				7.93				5	63.6	0.006	14.18		3.81	9.7
20	1	2	7		39.6							25	9.81		83				13.28				9.9	66.4	0.005	14.09		5.22	8.8
1	2	1	6	0.41	30.9	2.13	0.57	1.23	1.71	217.6	4.92		13.85	2.06	33	0.11	0.18	2.01	24.78	0.16		2.05	587.7	83.4	2.85	12.63	0.82	6.54	0.83	127	43.73	43.35	5.11	1.8	0.01	241.1	13.4877	119	19.1
2	2	1	9	0.33	33.8	2.4	0.67	0.57	1.71	153	5.58	22.3	5.52	1.74	68	0.07	0.56	1.92	6.59	0.16	230.359	2.51	101.2	79.6	5.61	10.27	1.14	7.32	1.1	222	27.62	30.91	3.97	1.11	0.01	158.3	17.9975	126.5	28.8
3	2	1	5	0.34	29.5	1.82	0.82	0.55	1.71	146.1	5.44		42.03	1.72	43	0.07	0.19	1.54	7.72	0.18		3.16	79.9	85.4	3.77	8.71	0.89	4.71	1.3	184	66.28	45.4	6.09	1.65	0.01	320.8	12.9619	109	15.4
4	2	1	7	0.42	30.3	2.2	0.59	0.48	1.71	160.4	4.93		6.79	3.37	47	0.11	0.25	1.8	6.2	0.15		2.15	97.5	81.1	3.68	18.45	0.96	10.29	1.4	192	13.75	23.93	4	1.99	0.01	251.1	11.8228	114.5	15.5
5	2	1	6	0.29	32	1.78	0.77	0.3	1.71	164.4	4.84		8.36	2.48	26	0.15	0.04	1.58	3.96	0.19		3.01	319.7	64.9	3.48	9.56	0.86	6.73	0.83	238	11.38	23.52	3.23	1.56	0.01	356.1	13.5634	96	12.5
6	2	1	5	0.31	31	1.71	0.5	0.53	1.71	164	4.12		9.33	7.97	48	0.1	0.1	1.44	6.52	0.16		1.98	52.7	91.9	2.48	8.01	0.88	4.81	1.4	103	19.61	37.53	7.34	1.76	0.01	155.5	15.5711	109	18.5
7	2	1	6	0.38	33.2	2.17	0.65	1.36	2.1	158.7	5.2		7.61	2.97	38	0.18	0.25	1.97	28.13	0.21		2.35	125.6	84.2	1.36	10.58	0.93	7.77	1.5	152	16.92	37.78	3.97	1.69	0.01	134.1	14.8569	125.5	23.4
8	2	1	6	0.14	34.7	1.85	0.68	0.33	1.71	181.4	4.52		45.75	1.28	39	0.08	0.04	1.34	6.11	0.14		2.19	555	74.3	9.12	11.95	1.27	5.45	1.3	183	22.12	25.64	5.09	1.51	0.01	709.5	14.4175	102	15
9	2	1	4	0.15	24.2	2	0.5	0.3	1.71	130.2	3.99		51.84	1.23	44	0.09	0.05	1.3	5.35	0.15		1.71		90.6	5.81	7.94	0.98	3.72	1.4	226	12.83	24.58	4.22	1.45	0.01	208.6	12.6518	99	12.4
10	2	1		0.31	27.1	1.58	0.63	0.71	1.71	115.5	3.88		46.08	1.47	62	0.12	0.24	0.93	10.38	0.17		1.73	262.1	98.6	7.02	13.45	1.71	8.06	1.5	203	12.19	32.89	5.05	1.36	0.01	176.7	17.4806	141.5	35
11	2	1	9	0.27	30.2	1.98	0.74	0.4	1.71	154	5.37		15.17	1.91	81	0.07	0.08	1.59	4.45	0.15		2.99		82.1	11.54	9.11	1.22	6.07	1.1	206	12.14	20.6	5.1	1.19	0.01	184.1	16.1506	134	29
12	2	1	4	0.38	34.7	2.4	0.66	0.28	1.71	196.7	5.28		10.5	1.52	54	0.05	0.14	1.85	4.94	0.15		2.19	58.1	74.1	7.54	9.06	1.72	6.41	1.5	218	19.15	24.32	4.2	1.68	0.01	646.7	15.6432	100.5	15.8
13	2	1	5	0.22	29.3	1.52	0.84	0.35	1.71	142.3	4.6	25	90.63	1.55	39	0.17	0.05	1.12	5.76	0.13	3.52	2.81	106.9	84.6	1.49	17.6	0.64	7.37	1.8	123	22.29	22.78	5.01	1.55	0.01	405.7	11.7499	98.5	11.4
14	2	1	6	0.27	35.3	1.51	0.51	1.31	2	150	3.63		31.21	2.04	44	0.21	0.19	1.11	24.99	0.17		1.68	409.6	88.3	2.81	8.24	1	6.65	1.5	235	14.19	45.4	6.41	1.7	0.01	149.1	8.3045	127.5	13.5
15	2	1	8	0.25	32.8	2.01	0.8	0.46	1.71	154	5.89	25.6	8.52	3.17	40	0.15	0.09	1.93	6.78	0.18	269.801	3.22	643.7	79.6	0.8	8.15	1.05	4.71	1.9	192	30.61	41.46	5.44	2	0.01	159.2			17.3
16	2	1	4	0.08	34.3	1.45	1.15	3.2	1.71	140.6	5.58		118.5		40	0.06		0.46				3.19			21.76	14.17	2.74	3.15	6.9		178.1	39.35			0.1	648.9
17	2	1	6	0.17	28.4	2.19	0.57	0.53	1.71	151.4	5.03		44.92	3.07	36	0.14	0.08	1.78	5.7	0.19		2.23	346.1	82.2	0.31	11.64	1.18	6.94	0.9	192	14.68	26.67	3.45	1.8	0.01	208.6		103.5
18	2	1		0.28	32.8	2.29	0.87	0.43	1.71	147.3	6.4		81.01	3.8	65	0.08	0.06	1.84	6.03	0.19		3.61	48	88.4	3.01	14.24	0.92	5.35	2.4	172	19.96	27.62	3.38	1.64	0.01	282.8	18.3432	130	31
19	2	1	6	0.23	28.3	1.58	1.13	1.69	2.1	113.9	5.73		256.77	6.44	41	0.18	0.25	1.24	31.26	0.21		3.19		88.4	13.42	14.21	1.56	3.5	6.2	195	51.2	45.4	2.77	1.37	0.01	299.2	12.4599	106	14
20	2	1	13	0.41	34	2.26	0.67	0.42	1.71	155	4.55		11.02	3.42	58	0.05	0.11	1.73	4.2	0.16		2.28	210.4	85	8.08	15.1	1.07	7.41	0.83	120	32.89	22.24	3.36	1.03	0.01	212.3			45
21	2	1	6	0.26	29	1.88	0.72	1.92	2.7	153.8	5.21		82.56	3.6	47	0.22	0.36	1.23	33.29	0.19		2.82	56.5	92.1	5.83	9.26	1.21	7.61	1.5	227	30.65	45.4	4.37	1.51	0.01	297.1	16.1247	122	24
22	2	1	20	0.27	35.1	2	0.63	0.56	1.9	131.9	4.68	29.3	9.83	4.78	81	0.08	0.1	1.55	6.69		102.747	2.2		78.7	7.45	17.27	1.06	6.44	0.9	222	17.42	18.87	4.72	1.03	0.01	124.7	20.6833	142.5	42
23	2	1	6	0.27	27.2	1.99	0.68	0.74	1.71	108.2	5.04		65.24	1.52	37	0.11	0.15	1.31	11.48	0.19		2.75	287	97.9	4.87	11.18	0.91	6.04	1.1	131	22.05	45.4	6.15	1.75	0.01	149.8	15.1985	115	20.1
24	2	1	8	0.19	27	1.94	0.59	0.56	1.71	126.6	4.37		60.86	1.31	47	0.1	0.13	1.49	6.5	0.2		2.17	285.2	85.9	2.35	7.71	1.24	5.49	2.1	219	12.52	45.4	4.65	1.64	0.01	222.1	13.5943	122.5	20.4
25	2	1	12	0.38	28.5	3.19	0.87	0.64	1.71	142.4	7.41	14.2	5.57	1.87	107	0.09	0.17	2.28	8.03	0.21	371.754	3.67	3186	79.3	5.26	16.09	1.53	8.15	1.5	202	34.8	23.38	4.35	1.05	0.1	197.6	21.4031	145	45
26	2	1	9	0.15	35.7	2.27	0.74	0.87	1.71	152.8	5.61		80.18	4.92	55	0.2	0.09	1.67	14.45	0.21		2.9	50.9	86.3	4.19	10.2	0.87	6.96	1.2	215	18.79	45.4	5.21	1.71	0.01	143.3		131
27	2	1	3	0.27	36.8	2.06	1.01	0.35	1.71	223.3	6.84		70.61	0.83	26	0.12	0.12	1.5	7.59	0.2		4.49	787.1	77.2	2.21	12.19	1.26	6.98	3.9	214	29.67	33.07	4.46	1.48	0.01	1403	30	33.5	7
28	2	1	4	0.26	39.3	1.99	1.18	0.46	1.71	285.7	7.37		1	0.52	23	0.07	0.16	0.89	8.16	0.18	21.5	4.62	888.9	77.9	4.44	16.01	2.32	10.7	2	202	27.42	28.61	3.9	1.84	0.01	329.8		85
29	2	2	9	0.32	30.3	2.33	1.06	1.27	2.7	136.8	7.42		48.47	1.11	97	0.16	0.22	1.94	25.39	0.19		4.25	266.7	82.9	11.13	6.96	1.42	3.77	2.7	278	28.86	45.4	4.22	1.1	0.02	236.1	15.1388	133.3	26.9
30	2	2	5	0.26	39.7	2.13	0.93	0.6	1.71	214.9	7.08		12.47	5.01	20	0.08	0.11	1.96	10.45	0.15		3.98	259.9	79	10.29	10.83	1.39	8.03	2.7	203	23.26	42.35	5.4	2.19	0.01	447.1	12.9823	78.5	8
31	2	2		0.16	29.5	2.23	0.8	0.69	1.71	129	5.64		18.52	11.29	64	0.09	0.04	1.7	3.84	0.14		2.94	102.4	86.6	3.18	9.59	0.89	5.08	1.2	260	3.75	19.75	2.98	0.96		279	16.4795	128	27
32	2	2	9	0.34	36.3	2.18	0.76	1.23	2.2	205.9	6.4		2.93	3	58	0.13	0.15	2.01	22.1	0.17		3.42	117.5	78.7	5.13	15.51	1.16	6.49	1.6	180	31.18	44.54	2.75	1.27	0.01	271	13.9744	139	27
33	2	2	4	0.49	33.3	2.73	0.84	0.3	1.71	144.5	6.09		10.33	1.19	25	0.06	0.07	2.45	6.34	0.16	59.776	2.49	184	75.3	2.52	14.39	0.84	9.41	1.68	182	7.15	27.03	4.13	2.04		323.3			11
34	2	2	9	0.28	30.2	2.24	0.91	0.3	1.71	159.9	6.77		14.36	1.1	51	0.06	0.09	1.94	5.46	0.15		4.07	150.8	70.3	2.82	10.97	1.14	6.94	0.83	204	11.03	20.97	4.62	1.36	0.01	202.8	23.7436	133	42
35	2	2	5	0.21	33.3	2.05	1.1	0.53	1.71	174.1	6.18		5.63	6.39	43	0.15	0.14	1.6	5.75	0.16		3.67	50.4	85.7	3.04	14.01	1.28	6.87	1.2	182	31.02	31.04	8.11	1.64	0.01	294.9	11.4439	111	14.1
36	2	2	5	0.31	28.1	2	0.68	0.84	1.71	95	5.52	24.3	31.78	6.64	83	0.09	0.19	1.87	7.38	0.16	230.963	3.09	373.1	90.3	1.01	8.4	0.97	4.24	3.3	395	30.37	45.4	6.02	1.82	0.01	550.4	12.6962	114	16.5
37	2	2	4	0.25	35	1.73	0.88	0.47	2.4	197.2	6.81		137.42	0.77	46	0.17	0.07	1.91	8.67	0.33		3.8	2656	65.1	11.18	6.41	1.85	1	4.6	200	85.12	45.4	7	1.51	0.03	802	11.9817	94.5	10.7
38	2	2	6	0.24	35.2	2.81	0.68	0.24	1.71	258.8	5.3	24.9	20.52	2.78	34	0.15	0.13	2.05	4.37	0.19	112.186	2.01	110.4	80.1	1.89	14.51	1.15	9.51	1.41	170	33.16	16.24	4.3	1.91		251.1			15
39	2	2	5	0.46	33.5	2.28	0.52	0.37	1.71	164.1	4.81	20.5	6.07	1.4	52	0.26	0.1	1.87	5.59	0.23	131.93	2.08	26.7	83.3	2.73	9.3	1.14	6.79	0.9	208	11.27	21.69	3.77	1.58	0.01	203.9	15.19	127	24.5
40	2	2	5	0.34	35.9	2.02	1.18	1.27	1.71	230.4	7.63		28.92		38	0.05	0.16	1.47				4.53			7.56	14.61	2.41	6.63	2.4	190	69.45	37.39	3.79	1.75	0.02	1258	13.3278	98	12.8
41	2	2	13	0.17	35.3	2.84	0.96	0.26	1.71	185.5	7.71		65.31	2.21	77	0.07	0.03	2.93	3.66	0.21		4.61	198.3	84.8	1.78	11.57	0.56	4.52	1.4	226	36.74	25.91	4.86	1.4	0.01	236.8	17.3379	133.5	30.9
42	2	2	4	0.41	40.3	2.21	1.34	0.56	1.71	168.9	8.77	27.9	70.61	0.76	16	0.1	0.09	1.66	8.26	0.21	39.762	6.06	363.1	79.6	8.41	11.47	1.17	5.86	2.7	204	41.87	38.25	4.02	1.86	0.01	934.8	10.1878	87.5	7.8
43	2	2	8	0.24	32.7	2.44	0.78	0.59	1.71	139.1	6.29		23.3	2.91	69	0.07	0.13	1.57	8.68	0.18		3.56	279.4	92.2	5.16	9.56	1.11	6.63	2	264	5.01	32.54	4.84	1.45	0.01	310.7	15.7022	120.5	22.8
44	2	2	11	0.31	34.8	2.57	0.73	0.32	1.71	170	6.23		24.5	1.87	67	0.07	0.1	2.53	5.1	0.27		3.05	68.8	80.5	4.06	11.01	0.78	6.05	1.5	132	15.68	31.96	4.65	1.05	0.01	326.9	19.5161	141	38.8
45	2	2	3	0.24	35.2	1.7	1.15	0.67	1.71	269.1	6.68		11.24	8.43	14	0.08	0.08	1.21	11.73	0.21		4.67	391.7	74.7	0.39	18.09	1.4	11.4	1.7	167	9.09	37.49	2.47	1.98	0.01	287.7	9.18367	70	4.5
46	2	2	9	0.39	34.1	2.41	1.26	0.38	1.71	177.1	7.78		4.84	1.62	51	0.13	0.12	1.58	4.8	0.19		5.51	30	84.9	1.94	9.54	2.37	5.88	1.9	246	7.38	20.74	3.85	1.01	0.01	274.3	17.5171	128	28.7
47	2	2	10	0.31	30.9	2.33	1.3	0.21	1.8	161.6	7.21	20.7	0.63	1.4	50	0.11	0.07	1.75	5.3	0.14	43.398	4.16	97.9	66.2	2.58	14.6	1.22	6.33	1.58	143	20.6	15.2	3.4	2		242.7			17
48	2	2	10	0.21	35.8	2.59	0.97	0.51	1.71	139.8	6.4		61.61	2.98	52	0.07	0.08	1.78	7.32	0.19		3.87	288.7	88.7	2.75	14.09	0.83	6.31	1.3	221	18.89	21.35	4.37	1.14	0.01	350.6	13.37	159.5	33.8
49	2	2	4	0.71	35.6	2.26	1.12	1.22	1.71	199	7.42		178.84	12.28	38	0.34	0.24	1.36	12.17	0.29		3.43	1424	72.2	2.04	7.38	3.22	2.23	4.8	246	64.97	45.4	6.98	1.64	0.19	1476	10.8692	92.5	9.3
50	2	2		0.17	33.2	2.6	0.81	0.23	1.71	123.4	5.71		78.81	1.11	45	0.22	0.05	0.91	3.53	0.18		2.95	829.9	85.3	7.76	16.4	1.32	8.14	0.9	235	9.68	25.36	4.32	0.83	0.01	177.7	16.306	127	26.3
1	3	1	23	0	40	2.59	0.76	0.44	1.9	201	6		2	4	82	0.16	0.02	2.13	5	0.18	120.3	2.68	43.4	68	6.59	16.15	1	5.48	1	93	134.8	18.5	8.17	0.92	0.01	416
2	3	1	37	0.61	41.6	2.06	0.89	0.4	1.71	292	6.1		0.8	6.91	51	0.11	0.03	2.06	4.59	0.13	72.6	3.13	93.3	69.5	12.3	10.33	0.37	4.89	3.1	116	52.09	22.27	7.78	1.58	0.01	1476
3	3	1	21	0.54	40.8	2.51	0.6	0.4	1.71	236.3	4.86		0.3	6.29	123	0.19	0.037	2.36	4.15	0.14	111.8	2.35	63.4	74	3.25	10.26	0.5	4.45	0.9	172		20.5	5.12	1.19	0.01	173.3
4	3	1	23	0.62	41.8	2.1	0.86	0.39	1.9	196.5	5.26		1.89	5.87	98	0.09	0.084	2.25	4.79	0.12	31.9	2.97	169.9	74.8	3.54	25.19	0.56	7.1	2.3	128	171.9	32.91	6.03	1.06	0.04106	1476
5	3	1	7	0.83	42.6	2.29	0.83	0.32	1.8	339.9	5.46		0.3	4.04	64	0.14	0.067	2.17	4.25	0.13	119.1	3.09	35.8	68.1	7.9	13.12	1.7	8.83	2.7	142	88.49	33.97	9.67	1.68	0.01953	1476
6	3	2	18	0.43	35.5	2.65	0.48	0.36	1.71	201.4	4.61		0.3	6.15	80	0.15	0.025	3.3	6.96	0.16	80.3	1.79	35.7	69.8	4.61	12.78	0.28	4.3	0.8	134	86.7	18.33	4.46	0.91	0.01065	472.5
7	3	1	13	0.47	41.4	2.5	0.82	0.27	1.71	197.9	5.77		3.39	6.01	92	0.11	0.024	2.43	4.43	0.12	39.9	3.24	73.1	72.9	18.1	15.4	1.17	6.57	1.4	131	71.51	21.26	6.79	0.85	0.01
8	3	2	8	2.71	37.3	3.06	0.72	0.8	1.9	214	5.51		0.3	2.79	83	0.34	0.745		5.42	0.09			36.2	74.9	4.47	11.32	0.93	6.65	1.2	152			5.41		0.01	1476
9	3	2	14	0.48	37.8	2.72	0.76	0.4	1.71	159.6	5.28		33.56	2.57	91	0.1	0.112	2.63	4.8	0.24	75.5	2.27	98.8	71.8	2.85	13.57	0.63	5.68	2	120	31	12.84	5.98	0.47	0.01	406.2
10	3	1	3	0.73	37.4	3.52	0.76	0.34	1.71	287.1	6.45		0.84	2.88	34	0.15	0.079	4.16	9.07	0.24	51	2.83	190.6	65.9	2.43	17.23	0.39	8.13	1.95	119	32.8	21.1	6.31	2	0.01	367
11	3	2	11	0.69	36.2	2.47	0.97	0.42	2.8	222.7	5.75		16.17	3.54	65	0.15	0.041	2.33	4.35	0.13	70	3.47	401.6	75.7	5.27	24.21	0.3	7.16	3.6	127	42.78	45.4	6.6	1.52	0.01	1476
1	4	1	16	0.62	33.6	1.56	0.67	1.14	1.71	194.7	5.23		4.93	7.04	74	0.13	0.15	1.46	14.69	0.14	102.2	2.68	100.4	78.7	1.35	16.43	1.83	7.08	1.1	187	123.9	30.57	4.38	0.98	0.01	117.2	23.0253	151	52.5
2	4	1	18	0.37	33.5	1.8	0.47	0.88	1.71	184.2	4.59		3.84	3.69	73	0.23	0.09	1.82	9.11	0.2	109.954	2.1	265.8	87.6	1.91	12.4	1.1	6.56	1.5	175	479.1	26.68	7.42	1.08	0.01	98.2	24.4141	160	62.5
3	4	1	14	0.36	37.3	1.48	0.49	0.66	1.71	112.8	4.06		1	3.61	78	0.19	0.12	1.34	12.36	0.14	82.379	2.13	179.3	75	3.19	16.7	1.1	4.63	1	109	111.5	24.41	7.16	1.58	0.01	193.7	21.2306	158	53
4	4	1	3	0.45	36.3	1.27	0.66	0.9	1.8	283.9	4.49		13.92	3.44	46	0.21	0.14	1.12	30.96	0.16	41.687	2.5	88	76.6	3.52	7.17	1.04	5.82	3.3	151	50.85	45.4	5.2	1.84	0.01	619.4	15.5252	113.5	20
5	4	1	15	0.45	34.2	1.55	0.64	0.57	1.71	179.3	4.32		1	2.3	105	0.88	0.1	1.24	13.2	0.17	24.058	2.14	180.9	73.2	1.16	13.59	1.98	6.61	1.2	144	290.3	33.9	3.83	1.13	0.03	105.2	19.4097	160.5	50
6	4	1	20	0.48	37.8	1.57	0.6	0.84	1.71	223.5	4.38		5.43	6.48	88	0.81	0.12	1.29	13.06	0.22	79.577	1.85	268.2	76.2	2.25	12.99	2.32	6.77	1.1	259	204	24.27	6.06	1.26	0.01	113.2	24.6904	161	64
7	4	1	3	0.34	38.9	1.5	0.63	0.89	1.71	351.8	4.73		3.57	3.02	43	0.22	0.14	1.4	21.24	0.16	67.886	2.48	74.4	79.5	0.82	5.91	1.08	8.4	1.7	149	122.1	27.62	6.24	1.93	0.01	311.4	19.0664	119	27
8	4	1	15	0.83	40	1.36	0.73	0.89	1.71	201.1	4.49		1	3.17	117	0.71	0.23	1.28	13.03	0.2	31.641	2.83	102.3	78.6	2.56	8.13	0.77	4.83	1.8	186	110.5	25.6	3.91	1.04	0.01	208.8	22.6003	156	55
9	4	1	17	0.21	20.9	1.36	0.19	0.47	1.71	105.2	2.65		9.58	1.59	69	0.34	0.09	1.23	8.46	0.13	33.273	0.73	137.7	79.4	1.19	10.44	1	5.69	0.9	192	201.7	28.34	6.34	1.14	0.01	230.4	20.7791	175.5	64
10	4	1	19	0.36	38.9	1.63	0.56	0.26	1.71	193.7	4.68		1	4.35	93	0.44	0.07	1.69	8.98	0.16	89.373	2.6	185.5	68.5	3.05	19.04	1.07	5.78	1.3	212	167	20.04	8.59	1.28	0.01	94.4	20.7503	150.5	47
11	4	1	5	0.41	40	2.22	0.72	1.13	1.71	284.2	5.95		7.63	3.43	56	0.52	0.2	2.18	31.67	0.16	32.046	3.2	328.5	87.2	2.34	10.59	1.07	6.61	4.7	118	39.2	44.12	5.1	1.33	0.01	1286	18.5791	116	25
12	4	1	18	0.49	36.6	1.62	0.37	0.72	1.71	170.3	3.29		1	3.14	115	0.15	0.11	1.25	10.51	0.16	14.868	1.07	54.1	80.3	1.87	14.83	1.81	7.38	0.9	148	221.4	26.44	4.71	0.81	0.06	90.2	24.7475	157	61
13	4	1	18	0.41	38.4	1.68	0.49	0.86	2.4	162	3.76		8.72	3.95	153	0.92	0.1	1.5	14.53	0.19		1.63	108	76.7	1.29	16.75	1.07	6.43	1.1	211	200.2	45.4	4.78	0.9	0.01	105	24.8279	153.5	58.5
14	4	1	17	0.87	35.1	1.65	0.45	1.02	2.2	205.3	4.04		3.11	7.28	92	0.93	0.1	1.74	9.92	0.16	38.424	2	332.7	75.8	1.16	12.61	0.84	6.16	1.5	157	409.5	30.39	10.17	1.07	0.01	89.4			67
15	4	1	18	0.3	31.5	1.87	0.54	0.76	1.71	205.4	4.47		3.64	4.87	71	0.19	0.09	1.79	11.57	0.16	68.44	1.99	323.6	71.6	1.47	10.9	1.31	6.63	1.2	182	190	28.42	4.2	1.17	0.01	80.2	23.2458	168.5	66
16	4	1	19	0.41	33.3	1.68	0.44	0.88	1.8	197.2	4.31		3.41	3.53	97	0.45	0.08	1.8	7.65	0.14	95.951	2.16	273.4	76.6	1.03	15.09	0.79	5.75	2.2	184	237.3	26.27	1.82	0.97	0.01	117	23.4221	156	57
17	4	1	18	0.59	33.7	1.73	0.51	0.52	1.71	197.3	4.31		1	2.13	66	0.45	0.09	1.61	10.69	0.16	113.594	2.04	117.1	73	1.91	12.19	0.98	6.4	1.5	122	206	29.63	9.08	0.77	0.01	116.6	21.7161	171	63.5
18	4	1	7	0.72	41	1.57	0.6	1.87	2.2	256.6	4.95		3.87	4.42	56	0.12	0.3	1.42	49.07	0.15	11.56	2.57	287.9	84	5.58	14.76	1.02	7.48	3.2	164	32.34		4.66	1.78	0.01	912.3	21.8828	133.5	39
19	4	1	4	0.38	38.2	1.65	0.44	1.38	2.4	238.3	4.28		6.3	3.18	68	0.42	0.17	1.58	35.98	0.17	24.27	1.79	437.8	78.5	2.65	11.97	1.48	5.38	2.9	160	110.1	45.4	4.56	1.87	0.01	992	17.5142	109.5	21
20	4	1	8	0.42	36.8	1.74	0.73	1.08	1.71	101.8	4.49		9.43	5.1	76	0.36	0.25	0.92	22.2	0.15	37.455	1.52	101.7	80.3	0.77	11.46	3.77	8.57	1.8	278	176.3	44.19	4.27	2.01	0.01	122.3	20.6418	146	44
21	4	1	10	0.28	33.9	1.34	0.63	0.46	1.71	265.5	3.59		1	2.77	68	0.29	0.1	0.67	10.88	0.13	42.25	1.78	123.2	71	2.01	9.17	2.62	10.17	0.83	133	231.1	37.66	5.12	1.87	0.01	236.1	15.3146	149	34
22	4	1	8	0.54	34	1.72	0.59	0.68	1.71	218	4.2		1	5.33	59	0.18	0.1	1.73	10.14	0.19	48.086	1.98	103.5	76.9	1.4	10.44	0.88	8.35	1	142	146.9	32.44	5.45	1.63	0.01	274.8	17.7515	130	30
23	4	1	19	0.54	37.6	1.77	0.57	0.74	1.71	246.6	5.14		2.83	4.84	122	0.28	0.09	1.84	10.63	0.19	78.744	2.58	31.3	80.1	1.89	21.02	1.19	8.06	1.2	207	266.1	22.2	6	0.58	0.01	97.2	39.9846	127.5	65
24	4	1	4	0.5	40.2	1.66	0.79	1.05	2.4	250.3	6.28		5.54	3.35	65	0.59	0.18	1.69	27.08	0.18		4.06	276.8	79.9	1.43	13.87	0.94	6.71	5.1	109	43.91	19.59	5.59	1.65	0.01	1420	18.1077	117.5	25
25	4	1	4	0.46	39.9	1.56	0.67	0.85	1.71	236.6	5.22		9.27	1.86	41	0.34	0.17	1.44	30.67	0.17	22.929	3.16	84.7	83.6	1.48	15.59	0.71	7.72	3.2	183	39.6	27.77	3.93	1.74	0.01	1476	14.0496	110	17
26	4	1	6	0.51	37.3	2.05	0.77	1.01	1.71	179.6	6.21		8.1	2.19	57	0.28	0.12	1.99	27.16	0.16		3.47	69.4	69.6	1.58	14.16	0.96	6.37	2	146	91.53	40.45	3.27	1.43	0.01	161.6	14.87	110	18
27	4	1	2	0.51	38.4	1.68	1	0.92	1.71	142.2	7.06		34.54	2.35	53	0.26	0.21	1.63	31.04	0.17	26.189	4.83	630.7	80.8	1.73	11.57	1	6.71	4.2	174	33.96	25.86	6.2	1.84	0.01	1476	18.0176	110.5	22
28	4	1	3	0.47	38.3	1.87	0.71	0.58	1.71	199.7	5.31		15.07	1.49	24	0.25	0.15	1.88	12.18	0.17	2.226	2.84		82.1	1.93	12.33	1.12	9.35	1.4	160	15.36	28.46	6.43	1.7	0.01	860.1
29	4	1	6	0.43	38.2	1.77	0.42	0.71	1.71	248.6	4.09		1	2.69	43	0.18	0.08	1.5	14.84	0.18	72.151	1.58	87.4	78.4	0.84	13.21	1.75	7.45	1.8	123	86.95	18.22	8.15	1.82	0.01	792.4	16.7739	124.5	26
30	4	1	3	0.46	35.6	2.15	0.51	1.03	1.71	129.9	4.92		1	3.46	91	0.7	0.18	2.11	20.27	0.2	107.491	2.1	110.2	74.4	1.5	13.01	1.08	5.99	1.3	172	351.3	32.97	6.09	1	0.05	65.8	24.0344	154	57
31	4	1	18	0.4	36.1	1.54	0.54	0.83	1.71	206.7	4.44		1	7.34	86	0.22	0.23	1.48	8.1	0.15	109.737	2.42	226.2	72.4	0.99	14.48	1.04	4.58	2	118	262.1	19.96	5.13	1.28	0.01	165.8	22.5896	167	63
32	4	1	6	0.83	38.5	1.66	0.44	0.89	2	147.5	4.33		1	3.91	84	0.18	0.09	1.79	15.88	0.22	113.983	2.14	147.1	78.5	2.59	13.76	0.58	5.08	1.4	197	101.3	34.61	6.51	1.25	0.01	177.8	22.7615	161	59
33	4	1	17	0.59	38.3	1.82	0.84	1.13	1.71	342.8	5.92		20.24	3.07	45	0.31	0.17	1.74	28.53	0.15	68.25	3.45	179	79.7	4.68	13.55	0.94	6.84	4.1	193	64.65	25.78	4.92	1.67	0.01	953.8			26
34	4	1	13	0.51	35.1	1.15	0.78	0.83	1.8	74.7	4.37		16.26	5.32	63	0.27	0.07	0.84	12.3	0.18	14.559	2.69	296.1	70.6	2.62	12.46	1.54	4.64	3.7	148	232.6	28.19	5.78	1.46	0.02	120.6	18.2961	146	39
35	4	1	20	0.63	38.6	1.88	0.89	1.75	2.3	341.3	7.13		4.28	4.05	49	0.26	0.26	1.9	48.72	0.24	58.386	4.23		85.9	4.53	13.22	0.97	6.99	4.3	122	67.65	22.46	5.68	1.82	0.01	1399	18.1077	117.5	25
36	4	1	13	0.21	37.2	1.74	0.49	0.54	1.71	274.5	4.5		1	2.81	77	0.14	0.1	1.72	7.73	0.19	40.297	1.91	129.1	73.2	0.93	17.29	1.75	5.52	0.9	139	125.7	28.29	4.99	0.88	0.01	96.3		146.5
37	4	1	17	0.86	38.3	1.58	0.75	1	1.71	161.2	5.65		6.11	5.93	72	0.65	0.14	1.43	13.58	0.18	132.655	3.36	274.7	74.9	2.33	11.27	1.21	5.02	2.1	75	196.4	25.16	5.31	0.89	0.01	159.2	21.0962	157	52
38	4	1	5	0.33	37.9	1.86	0.9	0.94	2	226.8	6.69		13.09	2.48	54	0.39	0.16	2	30.15	0.17		3.85	157.4	81	1.98	15.12	0.98	6.65	2.7	153	57.31	30.32	5.25	1.43	0.01	828.8	14.8633	116	20
39	4	1	17	0.84	39	1.56	0.4	0.79	1.9	171.7	3.64		1.93	3.04	83	0.29	0.1	1.45	10.23	0.19	80.755	1.59	215.1	78.2	3.84	10.25	1.03	6.01	1	211	328.8	24.21	6.6	0.84	0.01	176.6	22.6223	154.5	54
40	4	1	12	0.6	37.2	1.2	0.45	1	1.8	180.3	3.19		3.46	10.38	76	0.26	0.09	0.87	11.24	0.13	13.958	1.44	211.2	72.9	2.71	10.41	1.27	5.92	1	227	101.3	25.8	6.64	1.15	0.01	165.9
41	4	1	16	0.53	38.6	1.3	0.53	1.8	2.7	244.5	4.06		1	7.45	92	0.25	0.09	1.01	11.54	0.31	10.52	2.2		81.4	0.96	21.08	1.19	7.94	1.5	214	173.3	42.45	2.18	1.42	0.01	97.9	27.2663	162.5	72
42	4	1	6	0.43	33.7	1.8	0.78	0.97	1.71	253.8	5.95		8.14	2.72	49	0.22	0.19	1.96	23.62	0.23	49.72	3.35	143.8	80.3	1.45	13.87	0.6	5.41	4.1	186	78.72	24.56	5.57	1.82	0.01	1310	14.5416	123	22
43	4	1	12	0.49	34.7	1.31	0.53	0.76	1.71	196.6	4.16		4	2.78		0.17	0.14	1.17	10.91	0.16	75.899	2.11	187.3	80.8	1.06	10.49	1.12	4.04	1.7	11.9	93.32	27.64	5.63	0.85	0.01	137	22.68	164	61
44	4	1	6	0.4	38.3	1.76	0.6	0.89	1.71	193.4	4.76		8.18	2.35	65	0.11	0.12	1.79	29.63	0.17	41.749	2.32	366.7	78.7	0.7	15.54	0.83	5.58	3.9	208	41.08	31.74	6.31	1.89	0.01	1439	19.6692	123.5	30
45	4	1	7	0.42	40.6	2.18	0.69	1.22	2.9	236.4	6.83		3.02	3.7	56	0.24	0.18	2.66	35.51	0.24	15.58	3.47		76.4	1.1	11.4	0.74	6.96	4.2	142	45.25	24.36	3.37	1.6	0.01	651.4	17.7002	128	29
46	4	1	3	0.54	34.3	1.75	0.49	2.09	1.71	230.7	4.66		3.66	3.63	43	0.38	0.55	1.85	52.69	0.17	45.512	2.08		76.4	5.39	18.66	0.86	11.12	1.1	101	260.4	45.4	3.8	1.75	0.01	603.5	12.6247	89	10
47	4	1	9	0.62	35.6	1.87	0.67	0.65	1.71	231.3	5.45	21.1	1	3.01	51	0.26	0.08	1.98	7.11	0.17	74.085	3.02	190.3	70.1	1.6	11.44	0.6	9.01	1	96	105.2	39.3	2.88	1.52	0.01	441.4	16.5835	134.5	30
48	4	1	8	0.52	29.1	1.65	0.41	0.43	1.71	200.7	4.01		1	5.23	73	0.24	0.17	1.69	8.09	0.14	74.085	1.44	305.7	68.9	1.49	10.32	1.44	9.89	0.9	218	152.8	45.4	5.53	1.99	0.02	136.4	18.923	136	35
49	4	1	7	0.58	34.2	1.43	0.57	0.81	1.71	225.3	4.18	22.4	24.31		51	0.22	0.12	1.31			43.633	2.22	0.6	82	0.87	14.59	0.84	7.05	2.5	153	20.87	20.54	7.64	1.53	0.01	1476	18.3105	128	30
50	4	1	15	0.77	34.5	1.35	0.6	1.2	1.71	186.5	4.24		1.37	3.09	85	0.33	0.13	1.18	11.43	0.17	36.688	2.39		85.2	2.91	12.71	0.91	4.12	0.83	188	182.5	44.75	4.36	1.16	0.03	82.3	24.0588	165	65.5
51	4	1	6	0.36	39.9	2.67	0.54	0.81	1.71	211.6	6.97		1		33	0.4	0.15	3.4			103.924	3.2		82.6	0.81	8.52	0.56	5.09	1.6	158	237	40.34	4.86	1.81	0.01	761.5	16.2197	136	30
52	4	1	9	0.43	39.9	1.32	0.39	0.64	1.71	189.7	3.35		1	2.18	53	0.24	0.09	1.16	19.69	0.14	53.441	1.48	169.4	71.5	1.42	9.4	1.04	6.09	1	181	100.5	45.4	3.87	1.43	0.01	256.3	19.1897	156.5	47
53	4	1	8	0.5	29.8	1.75	0.62	0.87	1.71	226.6	4.52	19	1	4.32	50	0.32	0.07	1.8	9.49	0.13	78.843	2.19	242.6	65.5	1.26	8.36	0.61	5.86	2.8	184	87.02	37.23	5.53	1.59	0.01	93	15.1597	143	31
54	4	1	8	0.5	35.5	1.36	0.62	0.65	1.71	252.5	4.52		1	1.5	62	0.29	0.23	1.38	11.42	0.16	37.726	2.76	98.4	73.7	1.76	10.09	0.95	7.35	1.3	141	116.4	33.39	5.18	1.11	0.01	127.4	17.5974	139	34
55	4	1	6	0.37	38.2	1.29	0.58	0.54	1.71	180.5	3.87		1	3.85	78	0.22	0.08	1	9.89	0.15	143	2.12	45.4	82.5	3.01	14.19	1.16	6.8	1.1	140	245.6	25.5	6.95	0.85	0.01	88.9	22.1892	168.5	63
56	4	1	8	0.59	32.2	1.62	0.59	0.48	1.71	176.8	4.32	20	1	5.04	55	0.37	0.13	1.64	9.24	0.13	65.651	2.2		65.7	1.02	13.68	0.94	7.14	0.83	119	242	32.69	4	1.43	0.01	458	14.9979	126.5	24
57	4	1	14	0.67	32.3	1.46	0.56	0.53	1.71	215.8	3.86		2.97	3.35	31	0.3	0.06	1.08	6.88	0.14	1.634	1.83	338.6	65.8	0.71	10.85	1.63	8.53	1.2	173	164.2	30.11	5.15	1.72	0.01	154.7	15.8699	142	32
58	4	1	6	0.54	37.3	1.92	0.57	1	1.71	178.6	4.27		2.67	5.28	94	0.35	0.15	1.69	12.7	0.17	18.807	2.03	0	75.5	4.61	14.6	1.43	6.26	2.6	200	189.9	30.33	4.21	0.57	0.05	84.6	30.6293	149	68
59	4	1	3	0.38	38.1	2.28	0.8	0.84	1.71	338.3	7.2		1.23	2.07	41	0.21	0.11	2.65	22.9	0.18		3.96		79.1	4.21	18.7	1.03	9.41	3.8	168	10.55	20.78	6.53	1.83	0.01	993.3	11.3376	98.5	11
60	4	1	3	0.51	33.5	2.18	0.57	0.57	1.71	170	4.92	24.4	2.07	1.05	53	0.55	0.11	1.73	5.55	0.17	100.71	2.25	697.4	84.8	0.43	18.34	1.55	6.26	0.9	119	302.9	25.47	6.46	1.48	0.01	856.7	20.7101	130	35
61	4	1	11	0.51	33.9	1.31	0.72	1.31	1.71	170.9	4.61		7.71	11.04	79	0.27	0.07	1.14	12.36	0.14	107.04	2.66	77.7	75.4	2.38	11.42	1.16	4.62	1.2	117	172.5	39.48	3.88	1.07	0.01	112.4	21.8032	164.5	59
62	4	1	6	0.38	36.8	1.91	0.45	0.76	1.71	247	4.63		1	2.04	67	0.38	0.1	1.87	26.88	0.14	57.93	2.1	167.8	84.1	1.59	10.12	0.88	6.46	2.7	116	42.61	17.31	3.75	1.62	0.01	994.2	21.809	132	38
63	4	1	17	0.54	36.8	1.56	0.59	0.77	2.1	178.9	4.08	24.7	1	3.61	122	0.93	0.16	1.23	16.13	0.19	42.92	2.03	226.1	81.5	2.76	13.59	1.14	7.32	1.1	187	264.3	39.78	2.89	0.64	0.01	102.2	21.6395	156.5	53
64	4	1	10	0.58	37.3	1.45	0.64	0.65	1.71	220.3	4.9		1	3.04	65	0.22	0.09	1.4	10.35	0.16	106.39	2.66	366.1	79.8	3.13	11.31	1.33	9.05	0.9	100	79.51	40.41	4.78	1.25	0.01	199.7	21.4573	148	47
65	4	1	10	0.26	36.7	1.2	0.35	0.7	1.71	135.3	3.32		1	3.18	88	0.16	0.14	1.23	9.64	0.14	68.48	1.54	252.5	78.3	2.63	11.04	0.6	6.49	1	76	86.77	25.07	5.24	1.09	0.01	174.3	19.9219	160	51
66	4	2	5	0.39	36.7	1.63	0.71	1.12	1.9	214.9	5.57		2.54	2.68	68	0.21	0.18	1.73	29.06	0.16		3.42	216.4	76.3	1.22	11.77	0.98	6.64	3.9	179	41.17	28.13	4.88	1.82	0.01	1023	17.3611	120	25
67	4	2	14	0.94	36	1.52	0.64	1.58	1.71	202.1	4.77		13.59	34.5	60	0.3	0.13	1.41	14.84	0.15	18.671	2.57	559.6	77.9	1.37	11.68	1.08	5.02	1.4	114	111.2	30.68	4.67	1.19	0.02	170.1	18.662	157	46
68	4	2	10	0.34	35.6	1.34	0.54	0.52	1.71	182.3	4.21		1	2.42	66	0.25	0.08	1.3	8.03	0.14	77.701	2.49	61	71.9	1.62	10.03	0.72	7.61	1.3	111	161.8	31.11	4.71	1.4	0.01	209.9	17.7112	136.5	33
69	4	2	5	0.42	40.6	1.74	0.65	1.25	2.2	205.5	5.58		3.85	3.01	53	0.27	0.25	1.94	36.42	0.25		3.14	135.1	76.4	1.73	10.86	0.72	8.98	3.8	168	52.54	29.39	5.61	1.76	0.01	1476	18.2419	134.5	33
70	4	2	16	0.63	36.9	1.46	0.52	0.56	1.71	149	4.01		2.46	1.57	62	0.23	0.09	1.06	9.09	0.14	74.873	2.08	398.1	76.4	4.57	11.49	1.41	5.88	0.9	131	95.75	27.9	4.33	1.09	0.01	204.8	17.2258	149.5	38.5
71	4	2	20	0.46	38.6	1.61	0.68	0.43	2.1	157.9	4.75		1	2.56	77	0.29	0.06	1.38	6.59	0.15	41.341	2.77	317.3	76.9	0.6	18.08	1.36	5.97	1.5	103	93.34	16.45	7.87	0.81	0.01	92.8	21.0828	154	50
72	4	2	7	0.42	28.8	1.52	0.71	0.36	1.71	193.8	5.19		1	1.68	63	0.46	0.05	1.65	7.73	0.16	141.885	3.27	77.2	67.7	2.91	20.14	0.81	8.28	1.6	113	267.7	28.14	2.96	1.48	0.01	588.2	13.485	141.5	27
73	4	2	12	0.39	35	1.72	0.35	0.53	1.71	187.9	4.04		1.23	2.32	62	0.25	0.09	2.01	8.17	0.22	38.666	1.67	323.7	75	0.92	11.23	0.45	5.53	1.2	130	189.4	33.27	1.09	1.65	0.01	108.3	19.0154	149.5	42.5
74	4	2	42	0.49	37	1.23	0.65	1.13	2.2	204.1	4.22		1.7	2.07	53	0.2	0.21	1.01	23.22	0.16	43.901	2.52		77.1	1.08	12.33	1.06	6.12	1.2	145	389.1	45.4	7.76	0.55	0.01	98
75	4	2	12	0.54	34.9	1.27	0.61	0.58	1.71	141.6	3.92		7.65	1.83	48	0.16	0.09	1.06	11.18	0.14	0.853	2.27	216.7	70.2	1.47	11.29	1.16	4.84	1.1	125	64.44	16.1	4.65	1.31	0.01	187.6	22.8928	155	55
76	4	2	8	0.55	37.5	1.95	0.63	1.29	2.2	186.3	5.48		6.24	3.3	57	0.11	0.16	2.01	34.24	0.23	72.05	2.87	337.8	83.8	1.74	9.94	0.82	6.09	3.2	85	28.47	45.4	4.81	1.77	0.01	514.1	19.9778	141.5	40
77	4	2	20	0.43	34.4	1.81	0.56	0.39	2	157.3	5.27		2.95	1.52	92	0.15	0.06	2.11	5.63	0.16	15.641	2.75	353.5	73.6	1.59	13.09	0.83	6.49	1.4	171	47.74	23.12	4.08	0.94	0.01	95.5	20.2395	154	48
78	4	2	5	0.24	41.1	1.36	0.54	1	1.9	234.4	4.15		16.93	2.1	62	0.14	0.14	1.23	29.89	0.19		2.08	325.6	82	2.04	9.95	0.92	5.82	4.3	90	38.77	24	5.72	1.58	0.01	1326	16.3769	126	26
79	4	2	5	0.48	34.7	0.99	0.43	0.53	1.71	181.4	2.93		2.16	2.22	59	0.19	0.19	0.78	10.06	0.17	16.841	1.59	135.3	74.7	0.2	14.15	0.83	5.69	2.5	167	26.03	17.55	5.86	1.65	0.01	968.2	18.3655	132	32
80	4	2	12	1.08	36.7	1.58	0.83	0.68	1.71	182.4	5.41		1.9	3.36	70	0.76	0.23	1.54	7.75	0.15	134.94	3.29	281.6	70.9	1.61	10.97	1.29	4.43	0.83	93	88.36	25.16	5.33	1.4	0.01	219.1	18.1387	148.5	40
81	4	2	17	0.47			0.84	0.56	1.71	201.6	6.47		3.94	1.17	71	0.19	0.1	1.94	8.81	0.18	30.507	3.62		74.9	1.22	10.29	1.16	4.03	2.1	169	115.1	36.55	4.25	1.17	0.01	107.6	20.2694	149	45
82	4	2	7	0.44	39.9	1.3	0.43	1.26	1.71	118	3.92		29.06	2.45	59	0.2	0.19	1.15	36.33	0.18	11.977	1.54		81.2	1.57		1.75		3.7	81			5.1	1.61	0.01		22.6592	129.5	38
83	4	2	3	0.34	39.6	1.78	0.67	1.13	2.2	330.2	5.45		16.91	2.27	40	0.21	0.12	2.03	30.44	0.16		2.71	893.1	84	1.24	12.22	0.79	7.19	2.6	162	33.24	45.4	5.35	1.5	0.01	1222	12.3457	90	10
84	4	2	6	0.55	37.8	1.46	0.42	1.03	2.2	219.4	4.2		28.85	2.81	53	0.12	0.17	1.46	27.91	0.16	10.779	2.01	372.4	83.6	1.56	11.47	0.85	7.11	3.1	164	71.44	28.96	7.1	1.6	0.01	1249	16.2477	126.5	26
85	4	2	7	0.59	36.5	1.61	0.55	0.61	1.71	215.3	4.23		1	2.92	56	0.13	0.08	1.37	9.58	0.15	33.522	2.27	251.2	87.9	0.81	12.07	0.99	7.3	0.83	164	60.9	30.74	6.29	1.34	0.01	191.6	16.0873	147.5	35
86	4	2	3	0.61	39.2	1.89	0.68	0.96	1.9	257.7	5.96		2.05	2.35	36	0.18	0.27	1.96	27.38	0.17	30.997	3.1	254.8	87.5	1.92	18.72	1.38	10.07	2.5	136	20.53	23.66	6.31	1.75	0.01	1167	15.0474	85.5	11
87	4	2	7	0.38	39.1	1.46	0.56	0.83	1.71	213.5	4.63		2.09	2.03	63	0.16	0.2	1.39	19.54	0.18	101.839	2.64	101.6	71.5	3.26	12.38	0.74	7.73	3.9	84	33.2	25	7.86	1.69	0.01	1169	21.6263	136	40
88	4	2	14	3.14	35.7	1.74	0.59	1.48	1.71	149.7	4.82		1	2.72	69	1.3	0.44	1.58	21.61	0.24	65.087	2.3	234.6	73.5	3.5	11.49	1.65	4.29	2.4	111	112.3	25.94	4.21	1.16	0.01	283.2	17.5146	153	41
89	4	2	17	0.35	40.6	1.88	0.64	0.49	1.71	177.1	5.37		1.13	4.24	94	0.16	0.09	1.98	8.13	0.15	32.45	3	187.4	75.6	3.31	13.09	0.6	5.67	1.2	192	105.5	24.49	10.03	1.52	0.01	100.9	22.4813	162	59
90	4	2	11	0.54	35.4	1.38	0.69	0.63	1.71	195.1	4.99		1	5.19	57	0.37	0.08	1.36	13.84	0.17	132.004	3.03	195	73.9	5.23	20.89	0.87	11.52	1.4	102	122.2	45.4	3.38	1.59	0.01	277.7	16.0231	118.5	22.5
91	4	2	5	0.41	38.2	1.3	0.57	1.25	1.71	308.4	4.37		1	2.83	48	0.17	0.2	1.32	31.09	0.18		2.49	208.5	72.8	3.39	10.96	0.49	5.57	1.3	155	64.73	27.52	8.37	1.33	0.01	981.7	16.3015	113.5	21
92	4	2	3	0.38	41.6	2.18	0.72	0.91	1.8	125.5	6.04		25.67	1.64	55	0.13	0.13	2.48	26.33	0.16	42.693	2.96	104.5	80.9	2.35	6.96	0.68	5.06	2.8	162	29.24	29.09	6.38	1.65	0.01	841.2	19.5609	143	40
93	4	2	3	0.21	35.4	1.79	0.63	0.47	1.71	160.1	5.12		2.32	2.05	61	0.11	0.1	1.7	8.16	0.15	62.372	2.87	450.8	75.1	3.46	12.75	1.14	5.89	1.6	106	146.5	21.38	10.76	1.45	0.01	133.5	20.5049	153	48
94	4	2	3	0.32	35.4	1.12	0.39	0.72	1.71	243.3	2.99		94.52	1.7	46	0.37	0.06	1.01	22.09	0.18	8.834	1.28	346.5	77	3.09	10.51	0.67	4.8	2.8	151	184.6	45.4	5.64	1.63	0.01	642.7	20.6612	110	25
95	4	2	17	0.42	37.6	2.02	0.55	0.58	1.71	165.3	5.26		2.04	4.98	69	0.12	0.11	2.22	7.89	0.18	22.57	2.48	227.3	83.8	2.66	19.76	1.2	8.5	1.7	138	154.3	26.62	10.75	0.9	0.01	111.8	21.4844	160	55
96	4	2	18	0.46	38.4	1.99	0.49	0.5	1.71	200.3	4.94		1	2.23	78	0.19	0.06	2.06	8.26	0.15	34.568	2.43	273	75.4	0.82	11.46	0.77	5.88	1.6	91	84.42	29.87	3.96	1.33	0.01	144.7	22.5163	150.5	51
97	4	2	7	0.63	35.7	2.15	0.57	1.05	1.9	214.9	5.93		46.22	2.21	60	4.02	1.3	2.53	27.79	0.21	8.793	2.77	143.4	83.8	5.27	9.09	0.93	5.84	5	113	50.89	28.46	4.42	1.55	0.01	985.4	22.9101	137	43
98	4	2	2	0.38	36.3	2.11	0.48	0.73	1.71	236	4.61		37.85	2.21	54	0.26	0.1	2.08	20.21	0.16	11.002	1.87	111.9	85.1	2.09	15.06	0.92	7.6	2.2	104	57.36	26.17	7.22	1.4	0.01	615.3	17.3554	110	21
99	4	2	9	0.52	30.9	1.62	0.36	0.62	1.71	130	3.91		1	3.2	53	0.24	0.08	1.83	6.93	0.13	77.668	1.57	913.8	60.1	2.76	14.29	1.09	6.79	1.6	94	116.7	31.83	2.91	1.32	0.01	293.1	13.6526	138	26
100	4	2	5	0.38	34.7	1.53	0.66	1.17	1.71	360.7	5.13		14.43	2.62	60	0.19	0.16	1.48	32.6	0.18	35.153	2.9	91	77.7	5.25	13.36	0.9	6.92	3.7	192	44.91	28.31	5.63	1.52	0.01	1268			23
101	4	2	7	0.61	32.5	2.03	0.49	0.64	1.71	215.9	4.9		1	2.44	56	0.99	0.16	2.29	8.14	0.15	43.398	2.19	271	75.3	0.8	14.61	0.63	5.31	1.1	130	222.1	28.63	3.53	1.52	0.01	623.5	14.4222	129	24
102	4	2	7	0.65	35.2	1.63	0.74	0.65	1.71	162.6	4.91		1	4.46	72	0.33	0.1	1.53	9.29	0.17	82.455	2.82	237	78.3	3.85	13.55	1.38	7.62	1.1	102	278.9	21.14	4.32	0.97	0.01	1108	16.7705	131.5	29
103	4	2	11	0.37	38.2	1.39	0.59	0.52	1.71	251.7	4.65		1	2.6	58	0.36	0.08	1.16	7.22	0.16	279.333	2.76	183.5	72.1	1.86	12.3	1.2	6.29	1.6	116	102.1	28.3	5.32	1.48	0.01	141.6	22.8994	142.5	46.5
104	4	2	7	0.57	30.9	1.38	0.63	1.02	1.71	208.9	4.52		1	3.33	49	0.25	0.14	1.21	17.35	0.15	111.012	2.5		76.9	3.73	10.9	0.94	5.46	1.3	137	87	45.4	2.84	1.29	0.01	100.8		146
105	4	2	7	0.54	32	1.47	0.54	0.57	1.71	199.5	4.04		1	1.84	53	0.29	0.1	1.29	7.53	0.21	95.241	1.98	287.7	70.7	1.27	10.53	1.43	6.86	0.83	119	124	39.21	6.14	1.59	0.01	191.7	16	125	25
106	4	2	5	0.48	38	1.73	0.7	1.05	1.71	248.3	5.46		4.79	2.68	53	0.45	0.2	1.68	31.3	0.17	40.332	2.97	203.3	71.6	0.51	11.1	1.21	8.26	2.7	120	64.15	34.33	4.89	1.45	0.01	966.9	14.08	125	22
107	4	2	14	0.74	35.4	1.58	0.67	0.69	1.71	183.3	5.12		2.4	2.18	72	0.4	0.1	1.69	11.66	0.15	68.166	3.07	537.1	69.9	0.75	15.81	0.79	4.61	1.6	148	118.7	28.77	4.9	1.12	0.01	283.6	20.7839	145.5	44
108	4	2	11	0.42	38.6	1.42	0.48	0.57	1.71	171.7	4		1	2.68	62	0.4	0.06	1.5	9.45	0.15	21.302	2.04		73.1	1.67	13.78	0.56	7.22	0.83	16	93.89	27.64	6.1	1.1	0.01	106.3	33.0573	120.5	48
109	4	2	18	0.39	40.7	2.13	0.59	0.42	1.71	181.4	5.01		1	6.93	67	0.46	0.05	1.87	6.08	0.17	11.917	2.59	94	75.8	5.89	17.69	1.44	6.73	1.1	88	146.6	26.14	4.68	0.48	0.01	99.6	19.9381	146	42.5
110	4	2	17	0.49	36.5	1.65	0.66	0.58	1.71	164.1	4.74		7.83	2.65	74	0.19	0.11	1.45	10.44	0.16	39.859	2.68	102.1	84.4	0.95	8.9	0.97	4.52	0.83	131	117.5	33.26	5.42	1.27	0.01	299.8			49.5
111	4	2	9	0.53	34.6	1.77	0.67	0.85	1.71	140.4	5.05		1	3.18	51	0.52	0.1	1.92	19.31	0.14	27.898	2.65	29.4	81.1	2.89	8.6	0.6	7.27	0.83	99	236.6	45.4	3.52	1.47	0.01	184.7	23.5434	145	49.5
112	4	2	18	0.41	40.5	1.63	0.58	0.5	1.71	167.8	5.11		2.53	2.22	68	0.82	0.1	1.54	9.39	0.14	66.566	2.8	124.2	79.4	0.77	16.45	1.11	5.23	1.3	131	40.04	26.06	2.54	1.3	0.01	98.8	23.4897	149.5	52.5
113	4	2	3	0.57	40.7	1.44	0.5	1.27	2.2	272.4	4.25		1.83		39	0.23	0.19	1.33				2.17			1.35	13.69	0.9	11.11	2.3		31.37	41.35			0.01	1096	17.7367	103.5	19
114	4	2	18	0.62	41.7	1.52	0.67	0.43	1.71	248.8	4.63		1.6	2.83	48	0.4	0.17	1.4	10.65	0.16	48.209	2.66	188.4	82.8	2.42	18.27	1.1	8.36	5.1	145	41.48	22.78	2.76	1.49	0.01	1253
115	4	2	17	0.44	37.2	1.44	0.67	0.52	1.71	155.5	5.43		62.25	3.74	75	0.21	0.07	1.57	9.1	0.15	235.855	3.46	92.4	75.7	1.48	9.48	0.87	3.34	0.9	122	114.8	23.82	5.08	1.13	0.01	314	20.8117	139.5	40.5
116	4	2	3	0.32	36.9	1.62	0.75	0.78	1.71	158.7	6.18	21.5	3.36	1.78	56	0.26	0.11	1.94	29.5	0.14	42.462	3.63	444.7	71.4	0.77	11.35	0.96	4.44	1.7	154	52.94	18.6	6.37	1.46	0.01	493.1	14.08	125	22
117	4	2	6	0.51	39.8	1.53	0.49	0.43	1.71	158.3	4.18	24	26.69	3.2	45	0.23	0.07	1.51	9.4	0.13	41.08	2.04	186.8	80.9	3.03	14.86	0.86	9.52	3	208	9.79	22.25	5.09	1.19	0.01	392.8
118	4	2	5	0.57	41.1	2.12	0.76	1.2	1.71	345.3	6.6		1	3.52	51	0.3	0.17	2.2	35.35	0.22	2.49	3.84		88	1.11	16.89	0.69	6.67	3.8	150	52.24	22.57	5.27	1.57	0.01	1293	15.0067	123.8	23
119	4	2	7	0.64	32.5	2.29	0.44	0.56	1.71	223	5.49		1	2.54	50	0.4	0.12	2.82	6.99	0.16	55.44	2.03	250.6	71.6	1.71	10.52	1.2	6.96	1.8	131	104.1	25.39	3.46	1.36	0.01	253.3	16.0447	139	31
120	4	2	7	0.41	39	1.79	0.55	0.58	1.8	141.9	4.48	25.4	3.23	1.31	65	0.57	0.11	1.68	13.5	0.21	9.65	1.9		82.9	0.95	12.61	1.56	7.57	2.2	169	64.77	20.5	5.57	1.45	0.01	740.7	18.2029	130.5	31
121	4	2	3	0.53			0.54	1.45		279.5	5.51		2.3	2.36	38	0.22	0.24	2.03	33.84	0.15		2.78		69.9	3.8	12.36	1.24	10.03	1.8	151	27.36	40.3	3.9	1.62	0.01	581.1			10
1	5	1	1	0.38	40.4	2.21	0.65	0.45	1.71	274.5	5.71		5.52	1.3	53	0.24	0.105	2.11	9.31	0.21	153.499	2.45	141.1	69	3.28	13	1.54	7.03	1.64	171	53.34	29.54	4.14	1.96		830.5			12.3
2	5	1	1	0.59	37	2.31	0.64	0.32	1.71	214.1	5.77	22.5	0.3	1.4	52	0.31	0.109	2.32	5.34	0.22	265.453	2.7	175.7	69.8	3.15	12.11	1.14	4.61	0.88	115	81.6	19.46	7.8	1.83		1252			24
3	5	1	1	0.27	37.3	1.86	0.92	0.4	1.71	268.4	6.47		9.06	2.28	33	0.3	0.08	1.6	6.93	0.18	231.634	3.84	439.9	61.9	3.28	15.04	1.26	8.63	3.08	241	72.67	24.5	3.36	2.23		438.2			13.4
4	5	1	13	0.37	34.6	1.84	0.7	0.41	1.71	208.4	5.43		11.2	1.66	71	0.28	0.069	1.94	6.78	0.18	262.862	2.83	110.6	68.5	5.34	8.96	1.35	5.61	1.16	151	89.38	16.62	4.76	1.97		1172			27.5
5	5	1	1	0.54	37.7	1.8	0.51	0.34	1.71	209.8	4.64	23.4	14.43	1.54	58	0.31	0.12	1.76	6.87	0.18	132.464	1.87	361.3	68.9	1.83	8.88	1.52	5.45	1	159	27.96	17.29	5.29	1.71		1476			27
6	5	1	1	0.46	39.7	1.59	0.6	0.31	1.71	239.8	4.36	23.8	3.12	1.4	38	0.26	0.072	1.43	5.7	0.14	94.818	2.23	288.7	67.8	10.68	11.96	1.2	6.77	0.83	168	91.93	18.47	5.98	1.79		1087			14
7	5	1	10	0.41	37.9	2.18	0.68	0.56	3.6	213.9	6.25		0.3	3.33	104	0.51	0.137	2.37	5.67	0.21	269.46	3.4	82.1	70.7	1.95	13.59	0.94	3.72	2.34	99	108.8	17.49	5.25	1.35		618.6			50
8	5	1	1	0.32	38.9	1.88	0.79	0.38	1.71	237.4	5.24		1.29	1.49	46	0.23	0.095	1.56	6.71	0.18	203.662	3.02	82.6	72.2	1.01	14.5	0.85	4.95	3.12	206	43.12	23.19	2.43	1.56		672.7			15
9	5	1	1	0.48	37.3	2.25	0.8	0.37	1.71	223.4	6.49		0.92	1.04	51	0.26	0.104	2.31	7.04	0.22	202.632	3.31	108.7	62.4	3.43	10.4	1.27	9.03	1.78	152	119.4	25.94	5.74	1.94		604.5			26
10	5	1	1	0.46	37.9	1.98	0.77	0.25	1.71	209.7	6.1		0.3	2.05	64	0.45	0.11	2.08	4.83	0.17	220.098	3.1	94.8	69.8	2.7	10.75	0.85	4.9	0.83	129	22.89	15.51	7	1.47		638.2			24
11	5	1	4	0.43	37.2	2.11	0.6	0.26	1.71	175.8	5.19		0.3	1.1	49	0.24	0.04	2.31	5.07	0.17		2.06	136.7	64.7	7.21	19.22	0.86	7.04	0.83	126	69.23	15.79	5.89	1.37		571.7			12
12	5	1	11	0.45	36.8	1.48	0.4	0.41	2.3	179.9	3.67		7.97	2.87	76	0.25	0.08	1.3	5.41	0.13	153.179	1.61	122	70.4	3.38	9.98	0.92	3.87	1.47	162	53.83	15.8	4.66	1.34		495			47
13	5	1	1	0.4	36.1	2.38	0.66	0.53	1.9	280.1	6.01		0.32	2.54	61	0.37	0.104	2.71	5.8	0.21	180.973	2.68	364.1	64.9	2.99	16.87	0.73	7.51	0.91	189	86.32	23.65	4.05	1.63		520.8			22
14	5	1	11	0.48	42.1	1.24	0.85	0.47	2.3	217.6	4.61		1.22	5.7	97	0.33	0.103	0.85	6.87	0.18	184.36	2.79	75	70.7	2.05	13.11	1.79	6.56	1.11	190	40.65	17.67	7.63	1.3		1476			52
15	5	1	1	0.45	37.9	1.94	0.53	0.36	1.71	237.1	4.45		0.3	0.95	51	0.32	0.095	2.04	5.83	0.19	76.967	1.91	104.4	63.9	2.74	15.17	0.83	9.16	0.83	145	101.1	20.48	5.96	1.87		743.9			26
16	5	1	5	0.5	40.2	2.04	0.69	0.38	1.71	207.6	5.23		0.36	1.28	51	0.5	0.144	2.15	4.86	0.2	66.725	2.65	152.7	66	2.13	11.01	0.63	4.01	1.4	179	68.12	27.21	5.63	1.64		539.6			15
17	5	1	1	0.45	36.4	1.83	0.5	0.33	1.71	200.5	4.15		6.58	2.4	48	0.27	0.082	1.62	7.22	0.21	75.467	1.75	408.8	68.7	2.07	17.92	1.1	8.79	1.93	152	51.96	22.47	5	1.8		179.9			22
18	5	1	11	0.43	34	1.84	0.71	0.54	1.71	191.9	5.02	20.4	0.3	9.97	82	0.26	0.069	1.67	6.1	0.17	244.656	2.74	246.4	61.4	3.15	10.37	1.23	4.18	1.68	148	69.04	23.04	7.11	1.27		575.1			36
19	5	1	1	0.29	35.5	2.05	0.73	0.41	1.71	273.6	5.39		0.58	1.43	66	0.19	0.096	1.9	6.32	0.21	166.812	2.8	292.8	62.4	2.17	17.17	1.01	7.92	1.91	141	76.01	23.33	3.76	1.95		607.2			22
20	5	1	8	0.48	35.5	1.75	0.58	0.37	1.71	174.5	4.84		0.3	2.81	52	0.33	0.1	1.5	5.77	0.16	138.056	2.45	94.9	67.3	3.77	8.74	0.94	4.94	0.83	194	136.1	12.76	5.5	1.52		488.2			28
21	5	1	14	0.48	38.5	1.47	0.53	0.51	1.8	176.3	4.06		1.06	5.26	103	0.43	0.16	1.36	6.64	0.19	204.645	2.08	140.9	72.3	3.84	9.6	0.64	5.58	1.98	125	122.2	22.02	6.72	1.04		567.7			53
22	5	1	5	0.43	39.1	2.35	0.79	0.36	1.71	247.1	6.78		5.52	1.14	51	0.34	0.079	2.29	6.27	0.16	139.034	3.38	243.4	68.7	2.45	13.41	1.25	3.99	1.06	219	35.42	22.36	5.91	1.74		808.3			13.5
23	5	1	13	0.54	39.3	1.59	0.71	0.46	2.3	183.6	4.98		0.64	3.47	90	0.4	0.083	1.48	6.61	0.16	142.739	2.89	119.6	72	4.68	10.33	0.85	3.98	1.49	147	28.4	16.49	6.65	1.19		930.8			52
24	5	1	19	0.55	40	1.42	0.59	0.44	2	168	4.03		0.3	2.28	89	0.5	0.118	1.23	4.92	0.17	174.634	2.32	138.5	64.2	2.66	16.15	0.87	4.73	1.12	98	84.74	12.39	7.4	1.25		265			55
25	5	1	1	0.53	34.3	2.15	0.5	0.27	1.71	217.9	5.02		0.3	0.88	45	0.21	0.07	2.34	5.54	0.16		1.73	268.5	63.3	1.15	12.06	0.76	5.49	1.28	146	48.44	17.68	5.46	1.54		228			10
26	5	1	4	0.42	38.6	2.12	0.72	0.31	1.71	215.4	5.41		1.66	1.45	51	0.3	0.065	2.08	6.05	0.19	94.048	2.7	106.9	66.8	3.49	19.15	0.93	7.15	1.42	128	58.97	23.99	6.18	1.65		858.8			17
27	5	1	1	0.36	35.7	1.86	0.72	0.34	2	232.6	5.66		0.89	1.79	41	0.27	0.098	1.82	7.31	0.19	166.615	2.97	430.8	68.2	3.62	19.59	1.12	11.17	1.74	164	87.64	24.3	4.22	2.19		386.5			13.8
28	5	1	10	0.59	35.7	1.55	0.75	0.39	1.71	209.4	4.66		1.26	2.88	66	0.31	0.087	1.23	5.59	0.19	229.832	2.59	107.4	68	1.36	7.41	1.4	3.88	0.94	128	49.54	19.63	5.35	1.51		818			38
29	5	1	5	0.73	36.8	1.45	0.68	0.49	1.9	248.7	4.14		3.4	1.35	46	0.34	0.34	1.08	6.1	0.16	202.897	2.28	165.4	69.2	4.2	8.66	0.88	3.12	1.76	145	70.01	22.08	3.8	1.37		466			12
30	5	1	18	0.63	38.8	1.56	0.52	0.26	2.1	158.8	3.79		0.48	2.52	94	0.56	0.1	1.18	6.14	0.16	101.035	1.68	82.9	71.9	4.11	10.64	1.52	4.65	1.02	109	110.7	13.87	4.51	0.79		1150			40
31	5	1	1	0.5	35.4	2.13	0.6	0.35	1.71	183	5.1		1.08	1.26	37	0.22	0.077	2.2	5.86	0.2	164.114	2.22	164.1	64.7	7.8	14.58	0.96	6.54	1.04	128	56.19	19.39	5.41	2		361.2			14.5
32	5	1	8	0.94	39.9	2.07	0.7	0.53	1.71	217.1	5.65		0.3	4.02	81	0.47	0.122	2.15	6.3	0.22	136.172	2.66	417.1	72.7	7.05	14.21	1.4	4.85	0.83	171	84.96	15.67	5.22	1.36		1310			27
33	5	1	1	0.41	38.1	1.72	0.78	0.29	1.71	224.3	5.24		0.83	1.04	44	0.23	0.066	1.55	5.44	0.21	250.523	2.98	64.4	61.8	6.23	15.01	0.61	6	1.06	153	30.87	20.09	5.01	2.02		536.1			14
34	5	1	1	0.57	37.3	1.89	0.77	0.46	1.71	280.4	5.74		0.52	2.54	37	0.26	0.104	1.67	6.39	0.17	223.489	3.25	87.5	61.9	2.56	17.87	1.26	7	1.54	128	102.9	26.93	4.3	1.75		603.2			13.5
35	5	2	1	0.56	38.7	1.77	0.46	0.35	1.71	169.5	4.61	23.4	0.3	1.83	56	0.27	0.072	1.92	4.5	0.17	60.954	1.98	44.8	69.3	4.35	8.56	1.15	4.77	0.83	163	73.16	21.28	4.84	1.55		523.7			33
36	5	2	18.5	0.55	27.4	1.68	0.78	0.35	1.71	97	4.3	18.7	0.9	1.05	59	0.32	0.085	1.18	4.2	0.18	303.65	2.14	120.8	62.2	3.86	8.26	1.94	3.86	0.83	155	38.77	11.07	2.71	0.97		322.4			38
37	5	2	1	0.42	35.9	1.98	0.58	0.41	1.71	168.4	4.57	21	1.41	1.75	64	0.21	0.047	2.07	6.29	0.18	167.773	2.01	232.9	65.5	1.71	11.81	0.65	4.73	1.13	125	90.53	15.7	5	2.24		547.5			13.5
38	5	2	1	0.31	34.8	2.08	0.86	0.42	1.8	278.5	6.13	21.4						1.74			215.493	3.11					1.91												13.4
39	5	2	10	0.51	40.6	1.47	0.7	0.4	1.71	158	4.49	24.1	0.3	2.25	85	0.41	0.09	1.18	4.66	0.19	216.051	2.5	91.7	71.8	1.45	12.29	0.75	4.2	2.44	125	19.88	17.79	3.81	1.57		1285			36
40	5	2	13	0.67	37.5	1.36	0.63	0.45	1.71	141.7	4.21		0.3	1.56	79	0.35	0.068	1.19	6.28	0.17	208.79	2.38	170.9	63	2.9	13	0.95	4.75	1.11	65	85.57	11.09	5.28	1.29		1204			34
41	5	2	1	0.34	41.4	1.8	0.77	0.42	1.71	267.3	5.37		2.4	1.64	43	0.31	0.124	1.33	7.92	0.17	189.995	3.11	289.9	68.7	1.39	15.71	1.52	7.64	3.7	163	73.42	31.46	2.65	2.06		811.6			9.9
42	5	2	7	0.55	38	1.96	0.73	0.35	1.71	167.6	5.98		0.3	2.15	58	0.36	0.087	1.95	6.12	0.18	163.686	3	118	70	3.99	9.98	1.58	3.18	0.86	67	38.83	10.68	6.79	1.67		220.2			27
43	5	2	1	0.65	38.7	1.92	0.71	0.44	1.71	147.8	5.39		0.3	1.17	71	0.25	0.1	1.71	4.8	0.2	228.052	2.66	221.2	70.6	3.4	10.26	0.97	5.28	1.58	132	69.83	12.55	5.69	1.29		1242			30
44	5	2	13	0.69	38.1	1.48	0.55	0.42	1.71	127.1	3.93		0.3	1.81	88	0.72	0.086	1.21	5.24	0.17	166.812	1.98	250	63.8	3.18	9.97	1.22	2.58	1.68	111	58.83	15.31	4.64	1.12		299.3			32
45	5	2	1	0.52	35.6	1.69	0.78	0.45	1.71	214.8	5.51							1.58			156.565	3.33					1.07												24
46	5	2	15	0.67	37.9	2	0.58	0.36	1.71	138.9	5.03		0.3	4.23	76	0.56	0.103	1.78	6.03	0.19	228.857	2.41	317.1	65.4	3.12	8.94	1.41	3.63	1.21	93	301.4	15.21	5.14	1.28		969.9			40
47	5	2	1	0.74	38.5	1.97	0.61	0.4	1.71	184.9	4.7	21.8	0.41	1.47	53	0.34	0.135	2.07	6.5	0.17	80.558	2.15	299.8	61.5	4.57	8.52	0.89	4.89	1.27	134	91.27	26.55	6.05	1.7		698.9			16
48	5	2	1	0.36	37.4	2.15	0.8	0.28	1.71	215.2	5.97		0.88	1.89	37	0.24	0.106	1.99	7.14	0.18	96.59	3.07	474	70.2	1.2	14.57	1.11	5.67	2.1	173	114.1	21.51	3.06	2.03		227.5			9.9
49	5	2	1	0.38	36.5	1.96	0.7	0.36	1.71	223	5.23		0.3	1.18	46	0.22	0.128	1.67	5.37	0.17	157.135	2.48	64.6	71.7	2.05	9.64	1.59	8.77	1.63	143	29.01	19.73	3.74	2.35		371.9			24
50	5	2	1	0.34	36.9	1.55	0.71	0.26	1.8	201	4.84		0.54	1.1	80	0.3	0.132	1.43	4.17	0.17	239.398	2.93	213.3	69	2.55	13.79	0.85	4.82	2.09	144	66.85	15.93	5.69	1.48		530.7			32
51	5	2	1	0.39	35.9	1.78	0.7	0.34	1.71	238.3	4.91		0.3	1.09	58	0.34	0.114	1.6	5.83	0.19	153.138	2.6	136.9	65.6	2.36	15.17	1.25	7.3	1.35	185	64.35	21.64	4.25	1.73		631			22
52	5	2	1	0.55	35.7	1.69	0.65	0.42	1.71	231.9	4.47		0.8	1.02	41	0.35	0.1	1.29	7.1	0.15	189.861	2.28	322.2	69.3	1.59	11.81	0.97	4.73	2.74	198	99.71	25.79	3.97	1.74		458.7			11.8
53	5	2	1	0.67	38.3	1.76	0.76	0.32	1.71	193.5	5.15		0.3	1.95	64	0.33	0.075	1.63	4.76	0.18	227.19	2.86	511.3	68.9	4.59	12.16	1.27	4.87	0.83	118	111.1	14.84	7.4	1.42		1052			29
54	5	2	23	0.66	38.6	2.01	0.79	0.49	1.71	165.9	5.77		0.42	1.91	86	0.45	0.16	1.78	5.11	0.25	295.718	3.03		70.4	6.79	17.74	0.91	5.54	1.67	127	44.8	17.38	5.76	0.9		660.8			36
55	5	2	1	0.41	38.8	2.21	0.59	0.41	1.71	210	5.3		0.3	1.79	67	0.2	0.134	1.98	4.73	0.25	171.919	2.22	150.2	71.5	0.765	11.51	1.95	4.27	1.47	146	35.55	17.04	5.58	1.62		423.6			26
56	5	2	14	0.37	37.7	1.81	0.58	0.35	1.71	204.4	5.02		0.57	3.1	98	0.34	0.138	1.74	4.76	0.23	186.615	2.66	408.4	71.2	2.04	15.14	1.16	6.57	1.65	121	93.59	16.46	7.16	1.21		926.6			50
57	5	2	1	0.6	40.1	2.08	0.76	0.51	1.8	227.5	5.79		0.55	2.08	55	0.31	0.109	2.02	8.2	0.19	130.154	2.96	216.1	73	2.16	15.94	1.06	5.23	1.74	176	26.98	23.73	5.12	2.16		504.7			20
58	5	2	6	0.42	35.5	2.12	0.58	0.29	1.71	219.5	5.03		1.24	3.29	36	0.38	0.062	2.06	7.11	0.17	89.786	2.22	234.6	69.1	0.569	11.73	1.03	6.76	1.56	155	68.77	18.72	3.14	2.3		343			15
59	5	2	9	0.62	43	1.44	0.95	0.43	1.71	168.2	6.01		0.57	3.15	90	0.27	0.188	1.18	7.83	0.19	256.803	4.11	61.5	77.7	2.43	11.62	1.18	4.97	2.18	114	67.47	15.46	6.12	1.68		584.5			36
60	5	2	9	0.26	32.9	2.41	0.89	0.51	1.71	142.2	6.69		53.87	2.66	56	0.08	0.14	2.02	6.13	0.19	230.477	4.02	81.7	84.1	13.95	10.52	0.63	6.93	1.6	190	4.62	26.8	3.93	0.95	0.01	241.1			33
61	5	2	13	0.65	38.1	1.97	0.63	0.41	1.71	156.5	4.75		0.3	1.27	77	0.33	0.161	1.69	5.04	0.21	276.047	2.45	151.7	64.6	5.16	14.45	1.06	4.39	1.38	69	26.18	15.84	5.83	1.41		926.9			39
62	5	2	8	0.43	37.4	1.41	0.52	0.33	1.71	175.7	3.86		0.3	1.07	64	0.39	0.1	1.12	5.81	0.2	117.328	2.07	90.4	69	3.95	13.49	1.13	6.16	0.83	84	208	16.46	5.11	1.55		716.1			36
63	5	2	1	0.39	35.2	1.32	0.61	0.09	1.71	236.3	4.06		1.25	0.94	47	0.33	0.09	0.99	5.48	0.15	106.816	2.11	135.4	65.9	1.34	13.5	1.37	5.43	0.89	169	77.63	21.73	4.56	1.57		506.8			14
64	5	2	9	0.43	39.4	2.12	0.67	0.37	1.71	162.3	6.14		0.49	1.96	79	0.24	0.145	2.15	4.36	0.23		3.07	227.5	71	4.52	12.28	1.39	4.84	1.77	86	27.47	19.79	6.24	1.65		1210			37
65	5	2	1	0.43	36.7	2.16	0.86	0.47	1.71	247.5	6.17		5.14	1.66	49	0.37	0.097	1.76	7.37	0.23	165.782	3.29	323.4	69.4	4.35	21.01	1.54	10.34	1.83	195	73.87	24.95	3.75	1.88		452.7			12.1
66	5	2	4	0.42	36.8	2.45	0.88	0.45	1.71	252.2	6.8		6.57	1.62	42	0.38	0.201	2.17	6.98	0.28	163.279	3.58	156.2	66.3	1.54	10.91	1.23	3.69	2.96	219	56.19	29.61	4.01	1.93		276.9			12.7
67	5	2	9	0.62	38.4	1.25	0.74	0.39	1.71	184.1	4.56		0.32	2.17	56	0.26	0.11	0.87	4.88	0.16	186.5	2.71	149.1	76.9	2.26	11.85	1	3.48	2.39	118	20.48	15.56	4.37	1.55		696.8			33
68	5	2	8	0.44	37.7	1.95	0.85	0.41	1.71	243	6.53		1.65	2.82	71	0.37	0.12	1.93	6.3	0.2	252.602	3.75	165.8	75.9	2.03	13.59	0.96	5.35	0.94	148	66.97	17.99	6.24	1.61		332.5			35
69	5	2	8	0.41	32.8	1.99	0.87	0.28	1.71	159.4	5.15		2.2	0.93	59	0.31	0.1	1.51	3.98	0.19	253.122	2.81	501.2	70.4	5.59	21.13	1.1	5.81	1.54	147	264.1	15.13	4.67	1.21		1238			32
70	5	2	8	0.41	38.7	1.72	0.7	0.46	1.71	209	5.29		0.3	2.46	50	0.23	0.115	1.7	5.22	0.19	169.387	2.9	166.7	75	4.71	8.4	1.04	5.45	1.61	139	44.36	19.65	7.62	1.84		346.3			30
71	5	2	15	0.78	36.6	1.38	0.51	0.61	1.71	179.4	3.87		0.3	3.13	83	0.44	0.133	1.04	6.52	0.21	221.633	1.82	117.4	65.5	2.76	10.23	1.65	3.21	0.86	120	60.74	15.62	5.07	0.82		1050			43
72	5	2	10	0.99	34.8	1.67	0.59	0.43	1.71	166.4	4.44		0.3	1.16	64	0.43	0.086	1.3	6.19	0.18	184.781	2.07	83.7	62.1	3.54	11.42	1.58	3.16	2.18	61	108.5	14.89	4.54	1.37		1113			30
73	5	2	1	0.48	38.6	1.62	0.62	0.31	1.71	177.1	4.72		0.3	1.87	63	0.24	0.159	1.36	5.35	0.19	226.135	2.42	154.5	69.1	2.38	9.74	1.57	4.98	1.12	111	78.65	18.66	6.64	1.52		693.5			38
74	5	2	14	0.66	36	1.59	0.5	0.39	1.71	163	4.4		0.3	2.66	59	0.42	0.27	1.57	4.82	0.16	244.045	2.19	99.7	66	3.77	10.15	0.68	4.06	0.83	106	117.7	14.06	4.26	1.07		290.7			39
75	5	2	1	0.57	35.3	1.56	0.59	0.23	1.71	199.1	4.45		50.38	1.39	40	0.32	0.08	1.47	6.2	0.16	126.951	1.93	445.3	70.2	1.73	12.92	1.23	5.04	3.18	151	29.37	22.2	4.1	1.84		315.7			40
76	5	2	13	0.53	38.5	1.71	0.5	0.3	2	169	4.5		0.3	2.07	76	0.31	0.088	1.45	5.7	0.17	161.886	2	343.9	66.6	2.04	15.67	1.58	5.66	0.83	164	88	22.22	6.62	1.1		368.6			31
1	6	1	20	0.62	38.5	1.08	0.29	0.49	5.6	224.3	5.06		5.26	3.68	93	0.32	0.077	0.93	9.18	0.13	14.6	3.37	5	71.5	0.005	11.4	1.36	5	4.5		17.53		6.51	1.63	0.0286
2	6	2	19	0.54	31.4	1.71	1.24	0.35	1.71	154.8	5.93		1	4.65	72	0.43	0.11	0.46	5.39	0.21	84.8	3.45	198.3	66.1	2.56	16.61	1.52	3.97	2.1	131	63.67	45	7.92	0.94	0.047	1476
3	6	2	34	0.93	40.7	2.11	1	0.71	1.71	183	6.5		1	13.32	60	0.74	0.06	2.13	6.71	0.19	148.9	3.48	836.7	69.3	2.35	15.03	1.13	3.69	3.5	104	312.8	37.39	6.63	0.98	0.2453	1476
4	6	2	34	0.47	36.5	1.67	0.65	0.38	1.71	176	3.82		0.3	3.49	74	0.56	0.071	1.47	2.96	0.19	163	2.28	260	66.7	2.71	13.82	0.9	4.27	1.3	103		30.12	9.26	0.88	0.01209	1476
5	6	1	14	1.52	41.5	1.17	0.6	1.08	1.9	202.7	2.99		0.52	8.67	82	0.69	0.288	0.87	7.55	0.16	47.8	1.85	134.3	74.4	4.88	20.3	0.86	7.61	2	130	879.9	33.68	9.08	1.32	0.03116	1476
6	6	2	11	0.41	43.5	1.79	0.86	0.26	1.71	253.5	4.78		1.39	8.67	81	0.44	0.097	1.6	5	0.2	162	3.15	342.1	71.7	4.75	18.65	0.95	8.47	2.41	104	114.2	36.59	6.64	1.43	0.01	1475
7	6	2	9	1.05	32.3	1.57	0.63	0.51	1.71	253.1	3.1		0.3	3.18	85	0.4	0.115	1.03	5.75	0.13	126.1	2.15	220.8	69.6	6.59	13.31	1.29	7.13	1.85	205	174.5	39.71	9.67	1.6	0.01	1476
8	6	2	8	0.6	42.3	2.51	0.88	0.29	1.71	232.9	4.16		0.3	1.36	63	0.35	0.06	1.94	6.97	0.16		2.14	78.7	68.9	2.54	18.46	0.91	7.09	2	121	143.9	32.15	9.89	1.85	0.01	1476
9	6	2	23	0.6	38.7			0.46	1.71	213.6	6.01		0.74	2.69	110	0.18	0.072	2.13	6.18	0.18		3.61		69.5	8.5	17.26	1.56	6.06	3.2	171			4.34	0.55
10	6	1	23	0.61	39.3			0.45	5.3	203.1	5.1		0.77	2.31	107	0.45	0.042	2.16	6.66	0.23		3.05		68.9	4.5	24.09	1.07	6.99	2.6	125			4.47	0.36
11	6	2	20	0.73	38.3	1.93	0.79	0.37	1.71	209.3	4.75		0.3	2.27	75	0.49	0.07	1.9	3.28	0.18	136.4	3.02	224.5	67.7	3.56	14.02	0.77	5.54	1.82	106	883.3	30.18	6.77	1.4	0.01	1476
12	6	2	11	0.62	40.9	1.91	0.73	0.37	2.1	208.9	4.58		1	6.68	50	0.45	0.058	1.66	7.31	0.21	96.9	2.4	174.4	73.3	2.22	13.2	1.83	8.44	2.3	125	237.2	43.06	5.38	1.57	0.01	1476
13	6	2	19	0.85	36.7	1.31	0.62	0.79	1.71	157.8	2.9			3.03	67	0.36	0.227	0.95	5.32	0.23	62.4	1.71	194.3	77	2.34	19	0.93	6.63	2.9	123	538.8	28.5	5.25	1.93	0.02661	1476
14	6	1	36	0.65	40.7	1.92	0.67	0.68	2	209.2	4.18		2.64	6.33	114	0.44	0.033	1.6	7.05	0.24	85.8	2.21	253.1	80.2	4.21	18.89	1.08	6.56	4.6	173	463.6	36.28	5.79	1.13	0.0343	1476
15	6	1	19	0.95	43.2	1.62	0.62	0.66	1.71	196.2	3.48		2.09	12.85	76	0.38	0.148	1.48	8.38	0.24	97.9	1.97	134	81	3.21	16.4	0.89	6.22	3.2	135	175.4	38.96	6.38	1.35	0.01	1476
16	6	2	35	0.79	37.4	3.1	0.74	0.48	1.71	212.7	8.07		1	10.4	57	0.65	0.065	3.08	5.29	0.27	152.2	5.64	91.3	73.7	3.63	14.38	0.73	6.05	3	81	230.9	31.28	6.05	0.89	0.01	1476
17	6	1	19	0.72	40	1.2	0.73	0.48	1.71	228.8	3.71		1.11	5	50	0.38	0.093	0.38	8.78	0.21	88.3	1.9	135	72.4	8.01	16.05	1.42	7.96	3.1	87	137.2	36.03	6.46	1.72	0.01	1476
18	6	2	36	1.93	39.9			0.48	2.1	296.2	4.12		2.39	1.17	55	1.13	0.185	2.09	3.68	0.18		1.83		65.8	3.69	24.21	1.33	8.31	2.3	122			4.82	0.85
19	6	2	46	0.45	28.8			0.42	1.8	364.9	5.64		3.57	1.36	253	0.23	0.053	1.59	4.38	0.12		3.47		64.7	1.94	22.9	3.06	10	7.8	224			6.02	0.36
1	7	1	40	0.18	43.1	1.87	0.58	0.69	1.71	90.5	5.01		0.45	1.42	80	0.52	0.19	2.2	2.14	0.47	11.5	2.45	24.1	65.8	1.02	18.32	0.52	5.19	4.89	338	31.63	30.73	4.86	1.35	0.01	521.2	20.0796	167	56
2	7	1	23	0.24	48.2	1.219	0.88	0.49	6.3	137.3	4.71		0.6	1.47	77	0.43	0.05	0.84	1.79	0.26	71.9	3.16	8.9	75.7	1.92	18.4	1.98	5.91	5.43	350	35.17	24.28	4.22	1.53	0.01	237.3	26.5668	182	88
3	7	1	43	0.24	44.3	1.688	0.737	0.44	1.71	144.6	4.77		0.42	1.52	77	0.19	0.032	1.32	2.18	0.96	35.4	2.94	12.4	74.6	0.939	13.76	1.99	5.83	6.24	319	29.44	23.77	4.33	1.21	0.01	210.5	21.7876	194	82
4	7	1	58	0.14	42.5	1.628	0.631	0.34	1.71	131.6	4.44		1.59	0.73	66	0.27	0.039	1.55	1.99	0.69	61.8	2.3	24.8	72.9	1.52	19.72	1.78	5.25	4.04	324	34.07	28.24	4.9	1.19	0.01	335.2	28.9341	161	75
5	7	1	29	0.21	46.9	1.426	0.849	0.38	5.5	159.8	4.88		0.76	0.96	65	0.3	0.022	1.17	1.98	0.57	76.9	3.29	23.1	78	1.27	18.22	1.48	5.87	5.5	289	63.85	23.71	4.36	1.37	0.01	289.3	21.9774	181	72
6	7	1	32	0.08	45.9	1.745	0.705	0.38	3.2	126.1	4.36		0.48	0.95	75	0.33	0.043	1.34	1.78	0.41	32.4	2.73	16.5	75.4	1.24	18.6	0.83	6.52	3.6	253	5.63	14.76	4.58	1.29	0.01	195.6	22.3958	189	80
7	7	1	27	0.2	47.3	1.841	0.89	0.38	3.9	115.7	4.91		0.43	1	74	0.28	0.028	1.56	1.95	0.44	6.6	3.2	36.1	80.6	1.52	20.61	0.93	5.87	4.54	346	69.16	11.74	4.55	1.07	0.01	238.6	23.5479	182	78
8	7	1	51	0.37	40.6	1.374	0.679	0.7	4.2	81	3.62		10.86	1.28	72	0.94	0.081	1.28	1.6	1.02	42.3	1.99	133.5	67.1	0.428	18.33	1.05	5.4	3.44	407	369	19.81	8.02	0.98	0.01	480	28.7317	172	85
9	7	1	25	0.27	47.2	1.248	0.64	0.76	3.1	161.3	4.23		0.4	5.32	78	0.57	0.063	1.24	1.8	0.94	18	2.6	18.8	75.1	1.34	19.12	0.99	5.98	4.67	322	105.7	19.07	4.13	1.2	0.01	315.8	26.0388	190	94
10	7	1	32	0.28	46.3	1.566	1.665	0.46	4.6	163.8	7.42		0.51	0.82	80	0.69	0.064	1.17	1.99	0.47	68.1	5.41	23	74.2	1.94	16.83	3.57	5.37	4.95	337	28.52	43.08	4.34	1.38	0.01	298.4	26.0933	174	79
11	7	1	40	0.27	45.6	1.363	1.293	0.43	2.1	125.7	5.72		0.58	1.22	82	2.27	0.216	1.08	1.72	0.4	68.5	3.87	8.8	74.2	2.43	17.41	3.1	5.55	4.61	326	9.7	19.25	3.81	1.2	0.01	196.1	21.4536	163	57
12	7	1	28	0.11	46.5	1.677	0.659	0.43	6.2	118.3	4.92		0.27	1.95	76	0.27	0.028	1.82	2	0.82	40.2	2.78	23.6	75.6	1.53	17.13	1.35	5.32	3.2	294	78.86	27.08	3.68	1.4	0.01	288.6	20.8756	187	73
13	7	1	22	0.3	44.4	1.7	0.853	0.46	2.9	192.6	5.28		0.71	1.19	85	0.42	0.087	1.4	1.57	0.47	81.6	3.05	5	72.1	1.75	17.88	3.47	7.21	5.89	357	43.56	22.94	3.87	1.48	0.01	319	22.8571	175	70
14	7	1	27	0.23	44.4	1.476	0.587	0.47	3.8	203.7	4.01		0.18	1.46	95	0.26	0.036	1.28	2.72	0.45	33.3	2.18	12.8	75.5	1.54	15.16	1.69	5.66	4.01	350	29.02	24.94	3.87	1.1	0.01	547.2	26.0299	188	92
15	7	1	47	0.17	43	1.616	0.927	0.43	3.3	152.4	5.65		1.22	1.65	92	0.47	0.102	1.5	1.83	0.87	175.7	3.63	13.2	69.5	0.917	18.75	2.15	5.42	6.7	315	39.94	24.4	4.22	1.38	0.01	190.1	26.5118	178	84
16	7	1	32	0.15	43.5	1.511	0.736	0.29	2.3	132.2	5.32		0.25	0.89	82	0.35	0.02	1.49	2.37	0.62	82.5	3.2	8.6	72.7	2.41	17.73	2.7	5.26	5.9	333	18.62	14.54	3.71	1.51	0.01	296.8	21.1327	182	70
17	7	1	20	0.18	48.1	1.535	0.615	0.26	1.71	159.3	4.43		0.61	1.93	79	0.22	0.045	1.59	2.18	1.03	75.4	2.3	33.2	74.7	1.84	20.12	1.46	6.12	5.24	267	7.98	27.27	3.32	1.42	0.01	199	25.0593	173	75
18	7	1	26	0.21	46.1	1.729	0.576	0.52	5.1	153.7	4.55		0.37	1.15	72	0.35	0.033	1.78	1.31	0.5	87.1	2.38	46.5	72.6	1.24	18.34	1.35	4.97	3.96	273	16.6	8.81	4.77	1.5	0.01	460.1	20.7476	177	65
19	7	1	21	0.21	45.2	1.212	0.57	0.46	4.6	139.2	3.37		0.27	1.74	85	0.23	0.035	1.18	2.18	0.38	5	2.1	9.4	72.8	1.14	17.96	0.59	5.83	4.57	324	20.5	7.29	4.39	1.35	0.01	350.8	19.1598	187	67
20	7	1	24	0.24	47	1.689	0.702	0.42	5	158.4	5.26		0.31	2.09	88	0.28	0.04	1.83	1.96	0.53	84.1	2.91	9.1	76.4	1.23	19.68	1.83	5.54	4.32	263	18.22	16.97	4.35	1.2	0.01	179.9	23.0388	184	78
21	7	1	22	0.13	43.4	1.264	0.831	0.37	31.5	112.8	4.79		0.66	2.65	78	0.22	0.047	1.49	1.27	0.58	146.9	3.2	24	68.6	3.16	14.6	0.57	4.68	4.74	414	72.4	20.64	4.09	1.52	0.01	148.9	21.3669	181	70
22	7	1	20	0.16	43.9	1.33	0.645	0.39	2.9	139.9	3.88		0.97	2.01	76	0.23	0.033	1.18	1.98	0.49	29.3	2.33	13.7	70.8	0.821	18.59	1.32	6.42	6.18	291	24.57	24.89	4.82	1.28	0.01	280.6	24.0493	188	85
23	7	1	46	0.18	40.4	1.193	0.855	0.49	1.9	152.4	4.69		4.63	0.89	57	0.38	0.032	1.02	1.87	0.62	38.3	3.38	17.2	73.7	0.442	21.19	1.33	5.94	5.96	255	146.2	15.65	5.24	1.46	0.01	272.2	29.321	180	95
24	7	1	41	0.22	43.4	1.678	1.229	0.48	7	144.1	6.31		0.49	0.69	63	0.78	0.04	1.59	2.01	0.5	13	4.58	17.7	82.2	0.86	19.69	1.07	6.23	3.94	322	80.05	21.27	3.6	1.14	0.01	494.5	24.9337	178	79
25	7	1	21	0.18	45.7	1.477	0.563	0.4	6.7	135.8	4.03		0.83	1.33	82	0.29	0.043	1.48	2.29	0.96	44.9	2.3	7.5	68.6	2.27	17.67	0.93	6.54	4.87	266	61.02	18.63	3.79	1.32	0.01	440.2	20.5226	186	71
26	7	1	28	0.2	39	1.125	0.964	0.41	3	126.1	5.14		0.94	1.63	74	0.54	0.063	1.02	1.15	0.36	53.6	3.61	5	62	1.27	14.17	2.08	5.29	5.1	337	24.86	23.45	5.16	1.28	0.01	185.8	24.6914	180	80
27	7	1	24	0.2	44.7	1.376	0.795	0.43	6.6	178.8	4.39		0.92	0.88	71	0.76	0.074	1.08	2.01	0.91	64.2	2.82	31.3	76.9	2.05	14.24	1.76	5.37	3.36	306	107.7	29.84	4.55	1.34	0.01	227.9	26.5759	183	89
28	7	1	20	0.13	42.8	1.258	0.525	0.49	1.71	130.1	3.76		1.07	3.14	77	0.3	0.062	1.27	1.92	0.37	87.3	2.28	50.2	73.7	1.93	14.96	0.86	6.74	4.85	253	13.03	22.21	5.02	1.47	0.01	317.1	21.3669	181	70
29	7	1	51	0.19	44.1	1.451	1.161	0.42	3.6	147.9	5.7		0.7	1.16	83	0.31	0.059	1.38	2.39	0.77	16.2	4.13	26.1	74.4	0.641	18.18	0.89	6.57	3.84	384	30.17	19.71	6.02	1.46	0.01	237.9	25.4327	174	77
30	7	1	22	0.18	47.2	1.418	0.486	0.42	7.5	122.8	3.21		0.34	1.57	64	0.33	0.039	1.2	2.45	0.47	37.3	1.81	34.7	74.4	1.44	18.23	0.87	5.04	5	402	21.55	28.92	4.68	1.07	0.01	156	20.2812	172	60
31	7	1	26	0.4	44.2	1.02	0.84	0.55	3.1	170.6	4.87		1.95	0.8	71	0.36	0.065	0.88	1.83	0.63	33.9	3.42	10	71.4	1.6	18.8	1.68	4.6	3.02	349	61.45	29.16	4.53	1.41	0.01	237.3	27.4653	185	94
32	7	1	41	0.14	46.8	1.219	0.694	0.41	6.6	134.8	4.1		4.15	1.19	82	0.2	0.023	1.1	2.53	0.42	46	2.73	33.9	74.6	0.75	18.47	0.92	5.34	3.89	319	149.6	16.41	3.98	1.42	0.01	370.1	25.4848	190	92
33	7	1	20	0.17	43.2	1.121	0.879	0.42	5.9	151	4.96		0.25	1.02	72	0.18	0.046	0.97	2.08	0.5	49	3.7	13.3	75.9	1.21	18.91	1.61	5.18	6.59	261	18.5	15.44	3.93	1.29	0.01	419.9	19.5918	175	60
34	7	1	23	0.13	43.6	1.078	0.775	0.35	4	127.7	4.1		0.24	0.87	80	0.23	0.036	0.91	1.81	0.42	44.6	2.55	7.8	68.7	1.07	14.38	2.23	4.36	5.32	273	17.69	34.66	4	1.49	0.01	236	28.0248	187	98
35	7	1	23	0.18	45.6	1.14	0.53	0.33	3	122.7	4.14		0.31	0.98	72	0.28	0.051	1.19	1.9	0.3	10.9	2.45	22.6	72	1.46	17.46	1.34	5.35	4.26	307	37.55	20.94	5.71	1.15	0.01	380.6	19.8839	178	63
36	7	1	20	0.1	47.7	1.295	0.861	0.5	4.7	129.3	4.38		0.91	4.63	79	0.25	0.021	1.29	2.28	0.4	14.4	2.78	50.8	72.4	0.585	14.64	1.44	4.78	6.77	255	48.24	24.79	6.13	1.26	0.01	297.6	21.3068	176	66
37	7	1	26	0.26	48.7	1.23	0.841	0.52	3	159.9	4.75		0.21	2.32	67	0.22	0.057	1	2.27	0.49	60.2	2.92	11.7	76.8	1.79	16.86	2.12	4.52	6.17	300	52.98	17.65	3.85	1.28	0.01	293.5	22.2222	180	72
38	7	1	21	0.11	47.2	1.292	0.763	0.37	3.2	142.6	4.62		0.25	1.45	79	0.24	0.02	1.21	2	0.3	16.6	3.2	7.2	76	2.53	13.65	0.76	5.58	4.11	294	14.87	17	4.22	1.13	0.01	294.2	26.1738	177	82
39	7	1	49	0.19	40.2	1.414	0.875	0.29	3.8	199.4	4.55		2.71	0.22	38	2.98	0.104	1.45	1.55	2.69	102.2	2.45	26.2	69.5	1.62	13.54	1.69	2.52	1.93	147	43.95	20.68	18.5	1.32	0.01	202.9	17.5064	169	50
40	7	1	27	0.28	46.3	1.448	0.693	0.42	13.5	102	4.29		0.23	1.87	92	0.21	0.055	1.42	2.16	0.56	85.9	2.55	11.7	76.1	2.86	18.88	0.87	4.63	5.95	287	145.3	19.59	4.63	1.48	0.01026	256.3	23.04	178	73
41	7	1	20	0.2	46.7	1.279	0.585	0.44	10.3	164.9	3.48		0.34	1.65	70	0.28	0.028	1.26	1.98	0.43	26.1	1.91	12.8	73.3	1.35	13.44	1	5.66	3.03	253	27.19	20.56	4.64	1.55	0.01	361.7	21.9679	186	76
42	7	1	21	0.19	45.3	1.589	0.513	0.47	4.4	114.9	3.49		0.16	1.19	70	0.36	0.078	1.59	1.93	0.43	55.2	1.56	9.8	69.7	1.22	14.23	0.93	5.48	3.31	295	6.44	22.82	3.42	1.05	0.01	236.1	19.4094	183	65
43	7	1	22	0.43	45.1	1.71	1.005	0.62	3.3	152.1	6.66		1.46	5.54	72	1.43	0.107	1.55	1.94	0.34	84.6	4.21	27	70.6	1.22	20.15	2.63	5.78	6.24	346	155.4	20.19	4.26	1.32	0.01	235.7	25.4511	187	89
44	7	1	22	0.32	44.4	1.255	0.651	0.57	1.71	125.1	4.37		1.3	1.49	95	0.29	0.087	0.98	1.76	0.25	35.7	2.32	6.6	71.7	1.31	16.74	3.01	5.39	6.18	233	46.7	20.92	3.29	1.4	0.01	257.6	23.2912	183	78
45	7	1	31	0.17	44.7	1.526	0.815	0.29	2.8	129.6	5.02		0.44	0.67	64	0.26	0.041	1.45	1.65	0.61	95.2	2.98	10.1	70.8	1.14	15.14	1.82	5.31	4.07	265	20.42	24.92	4.93	1.08	0.01	321.3	19.7531	180	64
46	7	1	22	0.17	40.7	1.38	0.73	0.41	8.3	145.9	4.78		1.17	0.94	90	0.6	0.067	1.44	2.14	0.59	7.6	2.88	18	68	1.66	14.27	1.21	4.99	5.28	341	18.63	27.5	4.98	1.49	0.01	406.4	25.3086	180	82
47	7	1	42	0.29	46.7	1.143	1.084	0.63	2.5	189.9	5.27		0.3	0.93	73	0.61	0.073	0.87	2.39	0.78	53.6	3.54	38	72.3	0.185	20.82	2.18	5.71	5.87	290	57.77	9.2	3.7	1.1	0.01	346.4	22.8395	180	74
48	7	1	65	0.34	46.7	1.764	1.107	0.64	4.5	139.1	5.81		0.7	1.77	93	0.68	0.148	1.32	2.39	0.66	61.9	3.58	116.9	77.8	0.446	15.03	2.86	5.73	5.99	350	64.04	26.28	3.98	1.31	0.01	364.4	24.8981	188	88
49	7	1	30	0.23	46.5	1.237	0.822	0.45	1.71	148	4.9		0.26	1.05	69	0.21	0.155	0.95	1.96	0.45	71.5	2.72	23.2	77.7	1.42	14.1	4.62	5.84	5.68	284	35.95	18.4	4.75	1.45	0.01	386.8	23.8498	182	79
50	7	1	58	0.23	45.9	1.693	1.01	0.52	3.5	166	5.92		0.52	1.53	84	0.49	0.06	1.4	1.75	0.8	44.7	3.92	13.1	79	1.39	16.78	1.87	6	8.24	328	46.02	35.16	4.68	1.15	0.01	204.8	27.0842	174	82
51	7	1	18	0.25	45.4	1.11	0.609	0.47	6.6	146.2	3.75		0.16	1.13	75	0.17	0.039	0.95	1.78	0.37	49.6	2.44	15.5	76	3.95	17.91	1.1	5.33	4.64	311	16.17	17.34	4.6	1.11	0.01	184.7	18.8121	183	63
52	7	1	27	0.14	46.8	1.34	0.668	0.35	16.8	119.9	3.91		0.36	1.59	73	0.24	0.024	1.19	2.02	0.79	19	2.32	21.3	71.4	1.28	15.32	0.93	5.15	3.46	280	18.85	23.28	2.78	1.27	0.01	276.4	22.6347	188	80
53	7	1	38	0.19	46.3	1.478	0.906	0.42	7.6	204.2	5.48		1.17	0.96	82	0.28	0.065	1.32	1.78	0.32	161.7	3.64	27.3	76.1	0.711	19.34	1.95	5.62	6.06	282	30.17	18.73	3.17	1.45	0.01	232.1	23.2959	203	96
54	7	1	50	0.15	40.4	1.761	0.722	0.49	3.8	155.9	4.75		3.91	2.45	71	0.38	0.06	1.66	2.62	0.5	15.2	2.81	44	70	1.82	19.14	1.03	5.53	5.51	252	17.55	24.59	6.44	0.88	0.01	217.1	28.075	174	85
55	7	1	20	0.27	49.4	1.824	0.688	0.63	10.7	90.4	4.77		1.44	6.57	79	0.35	0.034	2.32	2.44	0.25	37.2	2.12	16.8	75.3	1.11	12.9	0.44	5.12	4.77	432	38.96	21.89	6.43	1.22	0.01	293.8	23.3887	173	70
56	7	1	19	0.32	46.1	1.175	0.768	0.51	6.8	148	4.57		1.82	2.58	81	0.48	0.076	1	2.01	0.37	104.5	2.85	7.2	76.4	0.276	21.48	1.66	5.45	5.48	273	95.09	21.85	4.11	1.53	0.01	481.4	21.6296	176	67
57	7	1	34	0.17	44.5	1.755	0.841	0.37	4.9	118	5.43		0.09	1.25	66	0.23	0.021	1.67	2.04	0.38	28.3	3.38	22.8	68	1.28	17.64	1.42	5.27	3.51	259	44.16	24.05	7.53	1.49	0.01	267.2	21.3839	173	64
58	7	1	58	0.13	40.5	1.44	0.78	0.34	13.5	176.6	5.3		0.68	0.9	96	0.39	0.05	1.48	1.41	0.72	49.9	3.5	35.7	68.6	1.27	15.82	1.07	4.08	6.19	356	14.53	17.51	4.65	0.8	0.01	340	25.1808	176	78
59	7	1	20	0.18	47.5	1.472	0.637	0.47	9.6	159.3	4.59		0.19	2.26	74	0.35	0.026	1.42	2.28	0.39	44.9	2.88	49	74.2	0.733	14.48	1.18	5.25	6.69	321	20.74	20.57	5.83	1.04	0.01	416.4	21.3039	165	58
60	7	1	47	0.27	41.6	1.787	0.79	0.4	2.9	162.3	5.53		3.62	1.22	86	0.6	0.082	1.65	2.21	0.72	60.6	3.36	52.1	64.2	1.43	14.68	1.52	4.3	6.89	289	53.46	30.52	4.29	1.17	0.01	268.1	24.6914	180	80
61	7	1	25	0.33	43.6	1.291	0.625	0.5	2.8	96.4	4.18		0.18	2.19	80	0.5	0.103	1.17	2.12	0.52	52.6	2.39	7.2	68	1.45	15.04	2.11	4.93	4.76	284	19.35	15.87	4.98	1.3	0.01	315.8	23.4075	179	75
62	7	1	21	0.2	47.8	1.303	0.768	0.44	8.3	156.9	4.36		0.09	1.04	83	0.15	0.02	0.96	1.96	0.33	67.5	2.7	5	72.7	1.33	18.74	2.34	5.41	5.95	382	86.16	22.89	3.94	1.11	0.01	170.2	26.5731	168	75
63	7	1	21	0.18	43.9	1.495	0.738	0.46	4.3	170.1	4.8		0.1	2.39	78	0.24	0.043	1.25	2.43	0.46	70.6	2.77	15.6	70.1	3.04	16.98	1.98	4.77	4.86	270	15.59	43.28	2.46	1.38	0.01	459.2	25.335	181	83
64	7	1	29	0.14	44.8	1.584	0.509	0.35	3.7	152.3	3.76		0.41	2.01	72	0.22	0.02	1.48	2.2	0.34	16.1	1.92	53.1	70.1	0.971	17.4	0.74	4.31	6.56	262	43.32	24.22	5.14	1.24	0.01	280.3	22.2439	192	82
65	7	1	22	0.5	44.4	1.065	0.63	0.5	13.2	127.2	3.39		3	1.5	98	0.57	0.091	0.82	2.3	0.23	69.4	2.13	18.1	70.9	1.73	15.97	1.57	5.08	7.04	399	138.8	12.56	3.52	1.44	0.01	251.8	25.6612	182	85
66	7	1	33	0.13	44.5	1.09	0.79	0.32	4.4	196.9	5.04		0.48	1.12	75	0.4	0.06	1.05	2.86	0.34	13.4	3.56	55.5	69.6	2.6	18.95	1.66	5.2	3.7	357	15.01	7.54	4.21	1.17	0.01	284.3	21.7994	174	66
67	7	1	24	0.19	46.4	1.751	0.63	0.44	2.1	147.1	4.72		0.2	0.81	74	0.74	0.056	1.68	2.38	0.49	27.6	2.62	34.7	73.2	1.87	19.93	0.64	5.67	4.51	358	120.7	23.56	3.9	1.01	0.01	699.5	18.5185	180	60
68	7	1	36	0.34	46.8	1.199	0.882	0.54	5.7	162.5	4.98		0.19	1.72	93	0.34	0.056	0.91	2.16	0.85	82.2	3.45	32.4	73.5	1.32	14.33	1.61	5	5.18	290	82.45	18.09	5.71	1.19	0.01	217.5	25.9455	181	85
69	7	1	24	0.24	43.1	1.591	0.598	0.54	5.1	129.8	3.96		0.66	5.29	65	0.31	0.073	1.57	2.18	0.61	56.2	2.1	27	65.9	0.918	18.41	0.69	5.41	3.51	300	24.91	27.79	5.01	1.28	0.01	296.9	21.847	179	70
70	7	1	22	0.15	48	1.561	0.444	0.4	7.7	123.8	3.68		0.14	1.89	85	0.26	0.021	1.45	1.94	0.41	34.5	1.8	17.9	76.2	2.23	15.91	1.07	4.94	4.71	245	21.6	12.02	4.28	1.37	0.01	259.3	23.04	178	73
71	7	1	38	0.53	39.9	1.401	0.801	0.7	2.8	159.9	5.25		2.29	1.9	89	1.83	0.339	1.19	2.84	0.46	46.7	3.33	26	60.5	0.581	18.38	2.06	5.47	4.96	352	47.28	33.89	7	1.26	0.01	255.6	25.963	182	86
72	7	1	26	0.21	44.5	1.717	0.63	0.5	3.1	111.1	4.7		0.57	3.73	76	0.22	0.057	1.61	2.25	0.68	28.4	2.52	20.6	69.8	2.48	14.55	1.93	4.48	3.75	262	9.03	19.28	4.08	1.25	0.01	212.3	22.1591	179	71
73	7	1	65	0.29	44.5	1.755	0.97	0.52	10.8	128.7	5.83		1.59	1.12	102	0.21	0.038	1.51	3.21	0.67	65.1	3.81	171.3	67.9	0.63	18.31	1.77	5.23	7.5	459	103.8	26.14	5.03	1.15	0.01	248.2	28.5763	188	101
74	7	1	26	0.25	43.2	1.28	0.82	0.53	4.2	180.5	5.18		2.27	1.81	75	0.59	0.083	1.1	1.99	0.38	5	3.47	54.1	67.6	1.97	18.39	1.72	5.51	5.64	384	25.13	29.13	4.8	1.22	0.0109	211.4	27.4506	177	86
75	7	1	25	0.15	45.5	1.287	0.721	0.37	3.8	134.9	4.22		0.63	1.44	87	0.16	0.031	1.15	2.35	0.4	62.6	2.62	8	74.3	3.73	17.56	1.3	4.96	4.66	280	5.21	22.25	4.25	1.25	0.01	278.6	17.0901	198	67
76	7	1	18	0.16	46.7	1.268	0.507	0.45	10.2	170.2	3.41		0.92	1.82	85	0.43	0.021	1.16	2.23	0.34	47.6	1.91	12.2	77.6	1.57	18.61	1.06	5.73	4.9	331	82.49	11.22	4.87	1.3	0.01	266.2	25.1429	175	77
77	7	1	39	0.45	44.8	1.777	1.316	0.58	3.7	179.7	7.65		3.12	1.15	87	3.04	0.337	1.62	2.67	0.69	46.9	5.69	8.8	71.9	0.804	15.76	0.92	5.44	6.69	339	18.25	16.88	4.02	1.22	0.01	192.7	24.2587	177	76
78	7	1	35	0.19	47.5	1.624	0.8	0.59	4.8	157.4	5.25		1.15	5.15	92	0.45	0.039	1.51	2.08	0.64	76.5	3.32	54.9	80	1.24	17.32	1.51	4.57	4.41	351	32.87	24.36	4.46	1.41	0.01	396.3	23.688	196	91
79	7	1	33	0.12	45.7	1.613	1.095	0.35	9.9	135.5	6.37		0.33	1.72	83	0.3	0.035	1.68	2.87	0.97	92.9	4.54	21.4	68	1.3	14.88	0.76	4.9	5.16	270	57.88	29.45	2.92	1.32	0.01	459.2	23.6686	195	90
80	7	1	25	0.09	42.6	1.149	0.669	0.32	7.1	125.9	3.84		0.15	2.34	88	0.37	0.056	1.03	3.06	0.35	70.9	2.71	5.6	68.5	1.46	16.89	0.97	4.74	5.89	271	8.73	24.98	5.09	1.04	0.01	289.3	21.5619	184	73
81	7	1	28	0.14	46.9	1.34	0.94	0.29	3.3	141.2	6.15		0.21	0.99	75	0.26	0.038	1.27	1.8	0.65	5	4.29	14.6	71.9	1.72	21.82	1.42	5.3	4.43	407	12.3	12.26	4.12	1.18	0.01	510.3	23.1837	175	71
82	7	1	23	0.22	48.2	1.495	0.647	0.37	8.1	143.1	4.57		0.33	1.06	90	0.52	0.053	1.28	1.9	0.56	117.4	2.67	10.1	78.4	1.07	18.55	2.06	4.63	5.68	263	150.8	35.42	4.16	1.44	0.01	199.9	23.5479	182	78
83	7	1	25	0.3	44.5	1.444	0.725	0.5	3.8	126.4	4.7		0.33	1.42	65	0.44	0.141	1.45	2.3	0.34	31.3	3.02	14.8	67.7	2.14	14.57	1	5.15	3.53	271	18.27	22.7	3.7	1.48	0.01	328.1	21.8776	175	67
84	7	1	33	0.18	45.1	1.39	0.65	0.54	5.1	142.5	4.25		0.91	2.04	78	0.46	0.05	1.3	1.77	0.46	52.9	2.67	61.9	71.9	0.961	18.81	1.22	4.88	4.13	243	51.16	12.55	5.07	1.16	0.01	301.4	24.9671	193	93
85	7	1	61	0.28	41	1.569	0.869	0.62	2.9	101.1	4.67		1.24	2.99	90	0.41	0.11	1.24	2.43	0.41	63.4	2.9	279.2	65.7	1.1	16.13	1.8	5.97	3.92	364	14.78	31.1	4.1	0.97	0.01	225.4	29.0367	178	92
86	7	1	24	0.17	45.8	1.369	0.576	0.41	9.5	131	3.74		0.47	1.81	76	0.23	0.026	1.26	2.28	0.36	30	2.28	17.1	72.7	1.37	18.68	1.06	5.51	5.17	350	142.9	21.91	2.75	1.14	0.01	78.6	27.0556	197	105
87	7	1	27	0.16	47.6	1.577	0.628	0.44	5.1	104.8	4.2		0.07	0.9	76	0.31	0.033	1.43	1.64	0.28	38.3	2.53	12.6	76.7	1.8	17.8	1.1	5.19	5.22	301	53.24	31.49	3.81	1.28	0.01	129.8	24.1517	182	80
88	7	1	28	0.27	47.2	1.575	0.81	0.45	4.8	107.1	5.07		0.88	2.44	80	0.33	0.03	1.49	2.39	0.76	7.9	3.31	31.8	72.1	1.18	19.02	0.8	5.17	4.9	271	36.33	27.38	3.75	0.87	0.01	542.7	24.5693	186	85
89	7	1	30	0.26	45.9	1.523	0.72	0.52	8.7	135.7	4.46		0.49	2.69	82	0.36	0.046	1.45	2.48	1.54	63.3	2.82	14.2	84.6	1.03	16.88	0.79	4.9	7.25	316	15.1	19.74	4.18	1.26	0.01	362.5	24.0569	173	72
90	7	1	27	0.11	46.9	1.67	0.32	0.42	11.1	101.7	3.43		0.37	1.35	68	0.41	0.03	1.84	1.7	0.27	16.3	1.31	26.5	71.7	1.42	17.85	0.54	5.44	3.43	218	37.91	24.43	5.62	1.18	0.01	739.9	22.6422	182	75
91	7	1	47	0.15	46.5	1.916	0.685	0.51	5.1	24.8	4.82		0.56	2.75	76	0.65	0.095	1.87	2.46	0.55	17.4	2.66	11.2	75.2	0.985	16.08	1.04	5.53	6.14	371	26.92	22.09	6.93	1.54	0.01	278.8	24.6181	178	78
92	7	1	23	0.18	46.7	1.347	0.982	0.46	5.9	181.7	5.15		1.29	2.31	81	0.19	0.031	1.17	1.69	0.33	25.2	3.85	14.7	74.4	2.28	20.38	1.19	6.79	6.53	388	61.42	16.09	3.86	1.32	0.01	298.3	22.7904	185	78
93	7	1	43	0.17	46.3	1.512	0.834	0.44	2.7	125.5	5		0.23	2.85	93	0.27	0.043	1.54	2.68	0.75	121.9	3.21	25.1	76	2.52	17.73	1.03	5.29	6.64	220	18.98	9.33	9.28	1.06	0.01	150.4	27.6817	170	80
94	7	1	38	0.16	43.5	1.428	0.719	0.42	4.7	119.5	4.42		0.75	2.39	86	0.26	0.026	1.27	2.03	0.59	13.3	2.82	83.7	71	2.55	16.34	1.37	5.23	5.16	374	14.74	20.57	5.28	1.27	0.01	229	27.7646	184	94
95	7	1	39	0.22	43.6	1.617	0.826	0.49	17.5	178.8	5.25		0.72	1.79	71	0.59	0.044	1.53	2.38	0.45	72.1	3.33	10.7	71.1	0.789	19.61	1.51	5.43	4.25	317	144	12.11	4.53	1.09	0.01	338.1	25.9259	180	84
96	7	1	52	0.15	45.4	1.666	0.707	0.48	5.6	125.7	4.85		0.13	2.16	71	0.25	0.04	1.78	2.66	0.57	17.8	2.9	71.4	69.8	0.82	19.6	0.73	5.7	5.28	316	47.02	21.99	4.76	1.25	0.01	305.8	23.9395	177	75
97	7	1	53	0.39	42.1	1.219	1.377	0.6	3	186.9	7.07		7.41	1.83	93	0.63	0.129	1.01	2.18	0.87	80.3	5.13	38.6	70.7	0.835	17.09	3.08	5.09	8.64	311	133.1	16.54	4.46	1.02	0.01	264.7	29.0548	176	90
98	7	1	42	0.11	43.9	1.639	1.265	0.34	4.4	153	6.03		0.2	0.67	63	0.34	0.051	1.37	1.85	0.58	18.6	4.62	16.8	72	0.753	15.92	0.85	5.2	6.02	280	90.09	16.18	5.03	1.18	0.01	153.9	23.9869	178	76
99	7	1	19	0.12	44.5	1.199	0.369	0.47	5.7	141.7	2.57		2.74	3.43	83	0.27	0.029	1.23	2.15	0.41	16.8	1.19	5.3	77.4	0.917	16.54	0.48	6.23	3.43	356	7.3	35.11	5.12	1.34	0.01	286.1	29.321	180	95
100	7	1	25	0.11	44.3	1.36	0.43	0.35	10.3	117.7	3.5		0.33	1.44	82	0.27	0.032	1.37	1.6	0.61	5	1.85	16.1	74.9	1.88	16.67	1.03	5.22	3.25	271	22.24	21.43	4.22	1.6	0.01	323.2	23.246	182	77
101	7	1	35	0.31	43.8	1.645	0.967	0.97	3	150.1	5.77		0.39	1.92	98	0.2	0.164	1.22	2.07	0.95	95.5	2.7	12.1	74	1.33	16.56	5.86	5.7	6.92	389	37.33	28.01	4.12	1.08	0.01	325.8	25.4991	192	94
102	7	1	49	0.28	41.1	1.899	0.824	0.47	3.2	149.3	5.87		0.25	1.85	100	0.21	0.049	2.01	2.08	1.17	120.2	3.76	18	68.3	1.07	14.02	1.21	5.9	6.36	226	22.97	15.17	5.15	1.37	0.01	164.5	20.7612	170	60
103	7	1	31	0.22	43.9	1.43	0.829	0.45	4.2	104.1	4.82		0.28	2.86	66	0.2	0.051	1.19	1.75	0.33	59.7	3.34	44	68.1	0.741	17.34	1.81	4.6	3.33	316	31.46	20.83	5.23	1.03	0.01	162.6	20.4783	174	62
104	7	1	27	0.16	44.8	1.327	0.813	0.46	9.3	178.7	4.68		0.39	2.14	59	0.22	0.039	1.17	1.93	0.47	60.5	3.42	22.5	76	1.29	19.51	1.61	5.48	3.34	221	26.64	13.73	4.36	1.3	0.01	230.5	20.7157	173	62
105	7	1	47	0.34	45.2	1.284	1.208	0.5	2.4	173.8	5.52		0.86	1.64	65	0.78	0.089	0.86	2.43	0.57	118	4.19	34.1	75.5	0.514	14.13	2.95	5.7	7.06	289	29.67	17.34	4.58	1.46	0.01	263.8	29.1421	188	103
106	7	1	24	0.16	45.3	1.427	0.754	0.52	3.7	148.7	3.97		1.81	4.17	72	0.35	0.04	1.45	2.85	0.32	101.7	2.43	41.2	72.1	2.44	19.85	0.73	5.37	4.93	444	63.83	19.6	6.53	1.02	0.01	482.9	24.2215	170	70
107	7	1	44	0.2	44.7	2.229	0.654	0.52	5.3	112.5	5.09		0.28	1.75	70	0.6	0.059	2.5	2.42	0.54	19.9	2.59	34.2	74.7	1.1	16.71	0.65	5.91	2.81	294	56.12	9.19	4.42	1.28	0.01	145.9	27.7177	172	82
108	7	1	48	0.16	43.2	1.59	1.04	0.36	2.3	127	6.92		0.78	1.62	73	0.49	0.044	1.53	1.93	0.78	5	4.39	19.4	69.3	1.14	15.89	2.35	5.07	4.53	287	33.09	25.32	7.34	0.99	0.01	163	26.041	193	97
109	7	1	23	0.14	45.8	1.399	0.554	0.38	15.4	126.2	3.57		0.33	1.54	78	0.34	0.031	1.21	1.86	0.55	19.9	2.07	40.6	73.5	1.75	17.78	1.07	5.38	5.27	325	109.6	32.01	6.74	1.67	0.01	302.3	20.5151	178	65
110	7	1	27	0.29	44.4	0.957	1.142	0.4	5.4	151.7	5.31		0.73	0.79	93	0.31	0.073	0.76	1.59	0.95	65.9	3.9	13.3	68.2	1.63	16.82	2.23	4.97	6.75	299	24.04	18.33	4.66	1.27	0.01	269.7	25.4365	186	88
111	7	1	27	0.34	46	1.343	1.017	0.61	2.8	151.1	5.62		0.41	1.35	83	0.84	0.149	1.21	2.53	0.5	23.3	3.87	10.9	73.9	1.26	20.18	1.87	5.32	4.34	296	28.55	26.67	3.03	0.57	0.01	353.8	24.3375	172	72
112	7	1	26	0.18	44.6	1.436	0.766	0.45	6.5	147.1	5.07		0.43	1.87	81	0.33	0.048	1.43	2.78	0.47	22.7	3.2	38.3	70.6	1.17	19.86	1.64	5.2	4.13	322	44.39	18.86	3.81	1.2	0.01	259	22.8395	180	74
113	7	1	42	0.17	43.8	1.356	1.019	0.4	3.1	118.7	5.97		0.91	0.91	92	0.26	0.132	1.23	2.44	0.59	50.8	3.74	30.9	69.8	0.247	22.2	3.35	5.84	5.73	385	17.22	32.88	3.24	1.09	0.01	174.6	18.3145	181	60
114	7	1	24	0.73	45	1.048	0.937	0.59	8.2	152.4	4.68		1.7	3.35	88	0.33	0.066	0.81	2.83	0.65	49.9	3.34	6.3	73.9	0.863	17.8	1.93	5.93	4.91	360	18.62	23.79	2.59	1.26	0.01	294	24.7104	194	93
115	7	1	35	0.11	45.3	1.35	0.45	0.32	7.8	88.8	3.5		0.09	2.49	73	0.21	0.05	1.18	2.44	0.5	18.9	1.79	81.5	66.2	0.642	15.89	1.67	3.35	5.86	228	114.5	12.64	4.8	1.36	0.01	387.1	21.7776	178	69
116	7	1	61	0.19	41.4	1.382	0.887	0.41	5.5	164.2	4.9		1.95	0.69	80	0.46	0.05	1.19	2.24	0.48	96.5	3.17	28.9	68.3	0.525	16.21	1.77	4.78	6.42	339	388.7	18.74	4.62	1.2	0.01	322.6	29.0688	173	87
117	7	1	57	0.18	41.8	1.414	1.022	0.49	3.2	145.5	5.2		1.35	1.72	76	0.29	0.096	1.1	2.4	0.63	142.8	3.54	38.8	74.5	0.82	15.41	1.66	5.86	7.81	349	35.26	34.33	4.39	1.13	0.01	312.4	24.114	181	79
118	7	1	62	0.27	43	1.32	1.309	0.49	2.5	132.1	6.41		0.52	1.64	75	0.11	0.134	0.98	2.19	0.56	150.7	4.56	25.9	69.1	0.446	14.59	3.64	5.66	8.45	351	35.14	40.73	4.5	1.46	0.01	231.8	26.5927	186	92
119	7	1	23	0.11	49.8	1.613	0.591	0.43	5.2	118.8	4.37		0.96	1.08	74	0.33	0.033	1.65	1.89	0.48	90.4	2.52	29	74.8	2.52	18.54	0.83	5.09	4.8	235	81.93	26.66	6.3	1.2	0.01	245	17.7221	184	60
120	7	1	27	0.5	46.3	1.565	0.797	0.66	8	211.9	5.41		0.71	1.35	94	1.41	0.186	1.25	1.61	0.39	87.5	3.06	24.8	74.6	2.63	20.03	4.29	5.45	5.58	367	29.82	21.36	7.27	0.95	0.01	447.5	23.7196	179	76
121	7	1	24	0.18	43.8	1.379	0.474	0.37	4.7	122.4	3.41		0.13	0.97	62	0.24	0.055	1.29	1.97	0.32	23.4	1.69	17.1	71.4	0.974	14.7	1.4	4.04	5.63	302	15.82	14.64	4.07	1.25	0.01	176	20.9877	180	68
122	7	1	30	0.27	43.4	1.18	0.87	0.52	2	160.5	5.11		3.83	1.18	76	0.48	0.081	1.14	2.63	0.52	5	3.41	67.2	69.8	1.13	16.03	1.69	5.48	4.08	234	12.12	26.1	3.99	1.14	0.01	222.3	25.2493	178	80
123	7	1	36	0.14	45.2	1.35	0.73	0.47	2.3	151.5	5.03		0.35	1.78	85	0.24	0.053	1.42	2.54	0.45	71.5	3.27	23.2	74.1	0.91	18.37	1.16	5.96	5.96	280	22.62	17.12	4.56	1.36	0.01	236.2	24.2123	176	75
124	7	1	37	0.29	41.7	1.14	1.03	0.5	2.9	115.2	5.9		0.52	0.91	79	0.22	0.144	0.95	1.84	0.33	18.3	3.87	21.1	67.2	0.538	16.91	4.45	5.76	5.46	340	11.55	9	3.55	1.45	0.01	462	24.4536	182	81
125	7	1	42	0.09	40.3	1.52	0.63	0.34	5.7	104	4.66		0.22	2.2	77	0.41	0.042	1.81	1.87	0.29	5	2.72	13.1	64.1	0.976	15.68	0.79	4.98	5.36	268	21.91	19.12	8.23	1.14	0.01	173	24.2212	197	94
126	7	1	29	0.27	48.2	1.6	0.83	0.47	3.2	147.1	5.11		1.09	0.84	84	0.37	0.068	1.12	2.08	0.52	5	3.14	36.3	76.1	1.46	20.16	1.96	5.47	5.07	408	91.35	20.36	5.06	1.08	0.01	203.7	25.9259	180	84
127	7	1	25	0.23	44.6	1.48	0.76	0.42	7	155.8	5.07		0.43	1.28	76	0.3	0.052	1.43	2.12	0.44	11	3.2	45.7	70.6	1.17	19.86	1.64	5.2	4.19	297	84.45	18.64	4.68	1.18	0.01	220.8	22.8395	180	74
128	7	1	29	0.21	45.5	1.16	0.73	0.42	3.8	138.1	4.62		0.61	1.61	78	0.17	0.037	0.99	2.1	0.38	32.6	3.1	97.2	75.5	2	20.72	1.63	5.54	5.67	256	14.47	12.53	4.09	1.35	0.01	330.2	25.8264	176	80
129	7	1	43	0.18	42.2	1.43	0.71	0.38	3.1	151.3	4.77		0.83	1.29	61	0.46	0.03	1.52	1.98	0.46	45.9	2.81	17.1	67.7	0.739	13.99	1.09	5.14	4.2	281	24.37	25.22	4.93	1.37	0.01	238.1	25.7276	173	77
130	7	1	20	0.11	43.1	1.11	0.59	0.38	4.3	136.7	3.92		7.26	1.52	88	0.23	0.02	1.25	2.14	0.25	30.6	2.31	18.6	70.7	0.941	19.16	0.77	5.13	3.21	326	104.2	22.05	5.54	0.8	0.01	618.7	23.7196	179	76
131	7	1	23	0.2	44.4	1.43	0.54	0.47	11	123.3	3.78		1.4	1.7	92	0.25	0.027	1.38	2.43	0.53	15.5	2.19	29.6	74.5	1.24	15.59	0.61	5.23	7.21	372	29.46	24.66	4.18	0.83	0.01	248.3	25.5922	179	82
132	7	1	39	0.14	43.7	1.68	0.45	0.33	5.9	97.1	4.07		3.49	1.04	72	0.25	0.037	2.03	2.4	0.93	5	1.75	30.7	67.3	1.14	17.76	0.59	5.19	6.75	313	37.36	23.39	3.8	1.12	0.01	254.2	21.2562	194	80
133	7	1	58	0.27	46.2	1.96	0.82	0.74	4.5	168.8	5.59		0.63	0.78	85	2.09	0.27	1.64	1.4	0.55	38.5	2.57	16.2	75.4	1.69	17	4.98	4.6	5.1	437	55.85	16.52	5.79	0.96	0.01	206.8	22.7204	173	68
134	7	1	40	0.08	45.3	1.22	0.87	0.27	3	118	4.89		0.32	1.21	88	0.23	0.033	1.3	1.96	0.37	60.6	3.31	39.6	69.1	1.11	12.96	0.59	4.09	6.72	286	29.31	26.58	5.02	1.36	0.01	455.4	19.5682	178	62
135	7	1	37	0.26	44.8	1.21	0.89	0.5	1.71	183.1	4.68		1.31	0.94	64	0.49	0.06	1.04	1.89	0.26	67.2	3.12	68.1	74	0.591	15.33	1.72	6.8	4.85	267	29.79	14.4	5.14	1.34	0.01	239.3	22.0932	178	70
136	7	1	28	0.19	43.9	1.26	0.66	0.47	3.9	114.6	4.13		0.23	2.63	65	0.1	0.024	1.22	1.71	0.42	22.5	2.66	14.8	71.1	0.47	15.73	0.91	5.15	4.64	304	14.59	27.28	4.6	1.43	0.01	243.9	24.4193	181	80
137	7	1	22	0.15	47.5	1.65	0.546	0.35	4.2	108.1	4.3		0.15	1.44	73	0.34	0.02	1.41	2.1	0.95	65.1	2.02	25.8	75.8	1.2	15.73	3.12	5.02	4.5	321	21.96	11.07	3.33	1.27	0.01	267.6	23.1206	174	70
138	7	1	20	0.19	47.9	1.41	0.499	0.49	12.1	126.1	3.09		0.14	1.91	70	0.14	0.026	1.15	2.04	0.29	12.6	1.56	20.3	75.5	2.61	18.2	0.8	6.57	3.62	268	42.67	19.01	5.7	1.47	0.01	394.7	24.114	181	79
139	7	1	22	0.2	46.5	1.529	0.839	0.47	3.3	131.1	5.08		0.75	1.52	70	0.18	0.038	1.24	2.31	0.35	33.4	3.33	29.9	73.6	2.2	15.26	2.03	5.27	4.07	264	21.35	22.03	3.63	1.17	0.01	400.1	26.7299	173	80
140	7	1	40	0.3	43.9	1.361	0.743	0.54	2.4	135.3	4.34		3.67	2.36	79	0.29	0.065	1.08	2.1	0.49	55.4	2.78	39.2	71.7	1.19	17.29	1.63	6.01	4.85	353	26.47	24.23	4.11	1.28	0.01	197.8	29.0612	175	89
141	7	1	24	0.21	45.8	1.36	0.66	0.5	3.1	171.7	4.94		1	3.83	83	0.56	0.076	1.21	2.86	0.6	5	2.8	18.9	73.9	2.01	16	2.4	4.97	5.54	309	18.59	12.02	4.38	1.87	0.01	267.5	25.2418	194	95
142	7	1	36	0.23	46.9	1.716	0.912	0.43	3.7	148.2	5.64		0.61	0.86	83	0.29	0.04	1.66	1.92	0.46	118.6	3.65	19.1	80	1.02	17.02	0.97	6.12	6.46	365	21.07	17.02	4.34	1.37	0.01	343.7	22.3954	183	75
143	7	1	23	0.22	46.6	1.453	0.567	0.42	8.8	119.6	3.76		0.55	2.6	76	0.34	0.052	1.48	1.43	0.54	13.1	1.94	19.6	72.3	1.25	18.02	0.77	6.13	4.29	288	32.42	38.32	4.88	1.71	0.01	299.4	20.679	180	67
144	7	1	51	0.32	43.4	1.405	0.935	0.51	1.71	156	5.31		0.41	1.2	79	0.22	0.069	1.12	2.2	1.36	45.1	3.64	30.6	73.3	1.5	19.25	1.91	6.35	4.68	245	9.48	13.37	4.66	1.09	0.01	314.4	22.2041	175	68
145	7	1	45	0.22	43.6	1.598	0.918	0.49	2.8	129.6	5.66		0.29	1.2	86	0.36	0.096	1.31	2.23	0.59	61.9	3.82	32.8	70.3	1.11	19.94	1.32	5.08	6.87	236	23.7	39.11	4.68	1.34	0.01	423.6	20.898	175	64
146	7	1	20	0.3	43.2	1.337	0.585	0.48	2.7	132.4	3.39		0.44	2.12	88	0.15	0.032	1.2	1.77	0.31	10.7	1.83	15.7	70.8	2.15	17.32	1.26	6.58	4.7	302	20.39	17.25	5.12	1.52	0.01	329.9	23.5457	190	85
147	7	1	22	0.26	46.1	1.348	0.512	0.46	12.1	117.4	3.23		0.16	1.09	71	0.31	0.033	1.04	1.61	0.66	41.6	1.78	10.6	74.4	2.69	18.93	1.34	5.76	3.25	179	84.67	23.26	5.59	1.24	0.01246	179.7	23.5666	176	73
148	7	1	25	0.34	44.9	1.688	0.953	0.51	6	146	5.56		0.38	1.33	76	0.3	0.083	1.33	1.67	0.58	61.3	3.6	46.9	73.1	1.32	15.46	2.39	5.19	4.77	281	53.02	18.97	3.5	1.44	0.01	339.6	22.5	200	90
149	7	1	39	0.32	45.7	1.848	0.767	0.62	2.1	177.3	4.87		2.12	1.17	53	1.94	0.156	1.13	1.81	0.32	59.3	2.27	89.2	78.6	0.161	14.61	4.51	5.52	7.01	290	127.5	24.84	4.32	1.36	0.01	228.2	24.4898	175	75
150	7	1	28	0.31	43.2	1.519	0.793	0.55	5.5	157.9	5.07		0.4	1.11	78	0.42	0.084	1.2	1.84	0.34	38	3.24	10.4	68	2.02	17.39	2.08	5.12	5.24	338	64.56	22.34	3.43	1.17	0.01	536.2	21.1616	187	74
151	7	2	44	0.08	40.9	1.89	0.67	0.3	2.2	109.1	5.49		0.6	1.8	73	0.19	0.027	1.92	2.9	0.3	33	3.12	53.8	63.9	2.02	18.44	1	4.26	4.72	251	10.32	27.68	2.95	1	0.01	157.8	24.9108	164	67
152	7	2	29	0.11	46	1.776	0.595	0.26	6.2	108.3	3.91		0.14	0.42	65	0.32	0.02	1.79	1.93	3.39	22.7	1.98	11	73.7	1.13	18.68	0.42	4.32	3.8	204	11.68	18.53	6.16	1.29	0.01	182.7	20.5499	168	58
153	7	2	24	0.1	43.9	2.148	0.774	0.36	3.6	89.9	5.05		11.84	0.54	62	0.37	0.02	1.85	1.36	0.43	60.8	2.87	27.3	73.3	1.05	18.77	1.13	5.27	3.69	242	53.34	31.6	5.02	1.36	0.01	306.8	23.6652	167	66
154	7	2	38	0.11	44.8	1.711	0.608	0.37	3.6	100.7	4.08		0.25	1.09	71	0.25	0.02	1.57	1.96	0.6	44.1	2.25	87.9	75.8	1.18	14.2	0.97	4.17	4.1	206	53.57	21.04	4.38	1.46	0.01	265.2	22.921	176	71
155	7	2	36	0.1	41.3	1.819	0.584	0.41	4.7	97.2	4.24		3.05	2.06	74	0.34	0.02	1.81	1.96	0.59	8.8	2.17	32.3	65.2	0.983	18.11	0.66	5.24	2.58	242	23.01	12.23	4.84	0.96	0.01	211.3	19.8141	162	52
156	7	2	24	0.11	41	1.584	0.537	0.27	11.1	71.8	3.63		1.5	0.9	59	0.21	0.021	1.47	2.03	0.24	53.7	2	51.4	66.5	1.52	17.76	0.86	5.46	4.69	141	21.77	39.64	6.2	1.2	0.01	334.5	20.8086	174	63
157	7	2	20	0.15	41.7	2.173	0.555	0.3	2	134	4.77		3.6	3.38	53	0.24	0.034	2.53	1.5	0.6	98.5	1.95	31.7	68.8	1.46	14.25	1.03	4.41	2.84	169	4.91	21.72	4.45	1.58	0.01	575.9	21.0772	163	56
158	7	2	54	0.18	44.4	2.066	1.108	0.41	3.8	136.3	7.01		1.28	2.2	51	0.92	0.063	2.49	2.19	0.57	40.3	4.65	67.8	67.5	0.917	20.1	0.75	5.36	4.26	179	43.64	24.91	7.85	1.24	0.01	276.3	25.0762	161	65
159	7	2	22	0.12	44.1	1.45	0.65	0.31	2.4	92.3	4.88		1.48	0.8	65	0.43	0.02	1.7	1.75	0.42	23.2	2.8	17.7	71.8	0.612	17.23	0.76	4.7	3.06	187	32.68	16.59	3.95	1.4	0.01	245.7	21.9136	180	71
160	7	2	22	0.13	43.3	1.927	0.591	0.38	3.5	100.3	4.56		0.36	0.92	64	0.16	0.02	2.03	1.7	0.39	16.4	2.27	26.5	71.1	0.998	15.52	1.03	4.82	5.1	180	26.92	13.32	3.06	1.2	0.01	250.9	17.8748	177	56
161	7	2	29	0.32	48.8	1.18	0.749	0.87	3.4	154	4.49		0.32	6.64	58	0.09	0.024	1.14	2.24	0.53	96.8	3.1	15.5	77.4	0.156	19.72	0.79	7.94	3.31	258	11.8	17.92	5.61	1.34	0.01	217.9	20.984	176	65
162	7	2	24	0.18	40.6	2.262	0.659	0.4	2.7	122.5	4.94		0.61	0.66	74	0.09	0.02	2.28	2.16	0.47	16.2	2.24	78.6	68	1.75	15.63	1.29	4.88	4.34	196	18.3	13.11	4.61	1.13	0.01	300	22.46	174	68
163	7	2	24	0.23	43.1	1.645	0.885	0.56	2.2	127.8	4.79		0.94	2.52	79	0.19	0.025	1.47	1.95	0.59	16.3	3.16	32.7	70.4	1.88	13.88	1.18	4.93	4.73	281	14.22	23.47	4.12	1.25	0.01	339.5	20.6758	184	70
164	7	2	25	0.14	40.8	1.726	0.628	0.36	3.7	113.8	3.81		30.33	0.83	57	0.5	0.034	1.39	2.03	0.43	26.1	2.03	39.1	73	0.988	18.23	1.64	5.13	3.51	237	23.97	16.38	4.62	1.19	0.01	242.8	23.1405	165	63
165	7	2	20	0.07	38.2	1.68	0.96	0.26	1.9	129.9	5.75		4.41	0.46	32	0.14	0.031	1.62	2.13	0.41	10.9	3.53	27.7	67	1.18	13.88	1.85	4.57	1.93	155	17.7	14.52	5.52	1.35	0.01	316.7	22.0386	165	60
166	7	2	18	0.12	42.5	1.778	0.885	0.37	1.71	94.2	4.93		3.31	1.02	72	0.16	0.023	1.56	2.66	0.41	59.5	3.04	56.2	78.8	2.05	15.34	1.49	5.03	3.16	279	5.71	17.82	4.24	1.33	0.01	287	22.4813	162	59
167	7	2	26	0.17	42.6	1.531	0.836	0.34	4	117.7	4.83		1.93	1.29	71	0.2	0.028	1.45	2.39	0.39	13.9	3.17	33.8	73.4	3.19	18.47	1.22	6.12	3.35	218	9.19	28.01	3.84	1.42	0.01	406.9	18.4819	196	71
168	7	2	22	0.22	40.6	1.583	1.171	0.5	1.71	132.4	5.37		16.42	0.62	63	0.31	0.044	1.18	2.37	0.58	62.3	3.49	91.6	72.7	1.73	12.67	2.24	5.43	3.64	300	29.85	15.11	3.42	1.41	0.01	363.6	25.2826	164	68
169	7	2	26	0.08	45	1.708	0.545	0.32	2	121.9	3.99		0.57	0.95	58	0.44	0.03	1.57	2.75	0.72	20.9	2.06	29.8	71.9	2.83	21.65	1.16	5.75	3.72	143	15.18	11.38	3.9	1.22	0.01	348.7	19.1327	168	54
170	7	2	19	0.1	38.7	1.87	0.76	0.28	1.71	119.3	5.36		2.16	1.08	61	0.17	0.022	1.77	1.89	0.81	5	2.94	56.1	62.8	1.25	13.83	1.55	4.07	2.87	143	10.82	20.26	6.56	1.23	0.01	244	22.0386	165	60
171	7	2	21	0.13	44.7	1.51	0.527	0.26	1.9	99.9	4.15		0.42	0.49	53	0.26	0.024	1.53	2.23	0.68	70.8	2.23	11.5	76.5	1.68	15.12	1.08	5	2.87	205	5.45	25.15	6.22	1.21	0.01	278.2	21.4533	170	62
172	7	2	23	0.13	41.4	1.273	0.603	0.3	4.3	120.6	3.85		0.23	1.12	55	0.27	0.02	1.38	2.35	0.77	23.1	2.29	40.4	66	0.907	15.88	0.72	4.38	4.23	213	22.22	18.16	5.9	1.35	0.01	356.9	21.875	160	56
173	7	2	37	0.13	42.6	1.609	0.745	0.25	1.71	111.3	5.06		0.43	0.89	64	0.27	0.022	1.67	2.69	0.45	5	3.13	12.1	71.2	2.22	16.17	0.81	4.6	7.67	206	12.75	38.67	7.24	1.67	0.01	450.8	19.8347	165	54
174	7	2	20	0.09	40.5	1.625	0.662	0.33	1.71	121.3	3.82		2.25	0.87	53	0.22	0.024	1.39	2.49	0.64	34.3	2.01	39.1	69.6	5.09	14.97	1.52	5	4.08	176	14.39	18.9	5.12	1.48	0.01	420	20.3125	160	52
175	7	2	34	0.08	42.1	2.307	0.844	0.31	2.4	137.4	5.39		3.82	0.89	67	0.39	0.039	1.93	2.17	0.54	106	2.87	72.6	74.8	2.2	15.69	2.35	4.5	3	268	28.94	13.3	5.25	1.14	0.01	282	23.3091	155	56
176	7	2	20	0.12	36.1	1.996	0.963	0.3	1.71	93.8	5.19		2.46	0.45	70	0.19	0.029	1.84	2.36	0.65	51	2.95	57	64	2.01	14.75	1.45	4.43	4.06	263	6.52	16.49	4.51	1.23	0.01	428.6	22.3757	161	58
177	7	2	44	0.15	41.9	1.881	0.614	0.37	3.8	109.1	4.72		1.5	1.2	79	0.27	0.02	2.04	2.97	0.9	16.2	2.49	66.6	71.4	2.47	13.99	0.72	4.02	3.51	253	16.68	45.22	3.56	1.35	0.01	240.8	27.3588	171	80
178	7	2	21	0.16	45.2	1.411	0.691	0.38	2.3	120.3	4.05		1.18	1.1	66	0.28	0.028	1.32	1.99	0.43	26.4	2.55	23.1	72.2	0.118	18.21	0.72	9.96	3.7	85	8.93	23.91	4.47	1.31	0.01	544.8	21.3039	165	58
179	7	2	51	0.16	47	1.633	0.733	0.42	2.9	118.5	5.07		1.91	1.41	58	0.17	0.03	1.7	2.7	0.55	95.4	3.05	75.5	76.1	3.94	15.36	1.28	3.84	4.62	224	38.64	22.54	4.54	1.37	0.01	618	21.2306	158	53
180	7	2	22	0.23	44.8	1.689	0.464	0.42	1.9	113.8	4.24		0.63	2.52	57	0.39	0.032	1.94	2.44	0.32	16.9	1.73	56.9	72.3	1.38	16.52	1.1	5.33	4.06	146	15.18	13.46	3.54	1.51	0.01	391.2	19.4708	177	61
181	7	2	22	0.21	45.9	2.004	0.744	0.51	4.9	82.6	5		1.05	1.42	61	0.34	0.02	2.12	2.12	0.74	5.1	2.57	68.1	80.2	1.42	14.7	0.82	4.1	3.22	154	69.61	25.8	4.51	1.25	0.01	291.5	18.4013	176	57
182	7	2	21	0.23	40.1	2.048	0.682	0.54	2.8	110	5.24		10.22	1.69	52	0.32	0.051	2.45	2.5	0.33	50.1	2.48	16.1	74.4	2.1	11.54	0.65	4.8	2.52	191	20.96	11.32	5.72	1.48	0.01	267.4	17.301	170	50
183	7	2	24	0.08	39.1	1.456	0.605	0.3	2.1	109.4	3.84		2.87	0.84	51	0.26	0.02	1.43	1.49	0.66	16.3	2.04	28.9	67.4	1.56	15.53	0.89	5.01	4.13	218	18.79	18.03	5.4	1.52	0.01	153.1	21.9713	172	65
184	7	2	21	0.13	43.6	1.634	0.536	0.28	4.1	128.4	4.08		0.87	0.81	59	0.28	0.022	1.78	1.88	0.31	23.8	1.96	22.6	71.1	1.45	15.77	0.74	5	3.17	272	21	14.46	5.91	1.51	0.01	209.6	29.3848	165	80
185	7	2	47	0.08	43.7	1.673	0.614	0.3	1.8	114.2	4.43		0.2	0.51	56	0.22	0.02	1.63	1.63	0.95	59.4	2.3	52.7	73.4	2.1	12.16	0.94	4.12	4.7	173	34.77	15.94	4.37	1.39	0.01	251.6	19.8413	168	56
186	7	2	24	0.17	40.9	1.368	0.686	0.44	3.8	95.4	4.37		0.73	0.83	58	0.29	0.03	1.37	1.96	0.65	26.4	2.69	100.2	70.4	0.773	13.95	1.03	3.93	2.53	217	20.16	18.75	4.72	1.33	0.01	215.5	20.7008	163	55
187	7	2	38	0.2	43.2	1.435	0.709	0.38	12	103.9	4.31		4.71	2.58	62	0.52	0.037	1.42	2.39	0.63	5	2.54	60	68.8	0.436	18.23	0.7	4.67	6.8	193	27.66	19.93	4.01	1.29	0.01	325.2	22.6562	160	58
188	7	2	22	0.09	40.4	1.69	0.53	0.28	1.71	117.5	3.82		2.95	0.66	65	0.16	0.03	1.28	1.65	0.75	5	1.93	79.1	67.7	1.81	15.28	1.74	4.6	4.98	214	30.74	13.23	4.51	1.17	0.01	336.7	19.3792	173	58
189	7	2	40	0.29	43.8	1.246	0.813	0.4	2.7	126.5	4.66		4.94	0.69	63	1	0.122	1.17	1.71	0.47	18.2	2.91	84.2	71.3	2.04	15.78	1.35	4.57	4.46	262	76.81	17.59	7.73	1.19	0.01	439.3	27.6817	170	80
190	7	2	42	0.29	40.7	1.627	0.576	0.48	2.2	116.8	4.2		3.61	0.88	60	0.53	0.099	1.46	2.24	1.09	71.4	1.95	68.5	70.7	0.64	14.31	2.09	5.32	4.73	275	32.09	33.66	4.27	1.05	0.01	226.3	30.1162	168	85
191	7	2	20	0.09	41.7	1.614	0.761	0.34	1.71	118.5	4.38		6.79	1.44	55	0.32	0.02	1.46	1.62	0.38	6.3	2.56	13	78.7	3.03	15.2	0.75	5.25	3.24	254	16.54	16.02	4.8	1.1	0.01	270.2	25.2174	163	67
192	7	2	35	0.2	42.4	1.892	0.751	0.41	2.1	163.8	5.3		3.89	0.97	63	0.4	0.041	1.63	2.07	0.61	190.5	2.89	55.1	72.7	1.51	15.15	2	5.24	4.95	283	47.99	15.92	2.95	1.2	0.01	190.9	29.0174	165	79
193	7	2	23	0.21	43.5	1.738	0.906	0.64	1.71	155	5.25		4.21	0.63	48	1.67	0.086	1.51	1.75	0.64	100.7	3.1	47.1	73.5	1.05	16.5	1.5	5.88	3.98	324	39.3	20.81	4.21	1.1	0.01	243.6	24.3824	167	68
194	7	2	23	0.13	42	1.482	0.69	0.33	1.9	101.9	4.17		0.63	0.83	66	0.12	0.032	1.19	1.43	0.66	22.4	2.45	11.2	68.8	1.67	12.79	1.64	4.72	3.54	202	25.02	26.92	5.31	1.33	0.01	577.4	20.202	165	55
195	7	2	28	0.26	40.8	1.437	0.7	0.5	1.71	156.2	4.9		5.98	0.91	50	0.36	0.123	1.47	1.64	0.67	100.2	2.98	22.6	75	1.94	16.56	1.37	4.78	4.03	250	10.16	20.31	7.83	1.51	0.01	160.3	35.4938	180	115
196	7	2	39	0.19	43.8	1.583	1.002	0.4	4.5	107.7	6.09		0.99	0.64	54	0.31	0.022	1.56	2.07	0.63	5	4.21	59.4	70.7	1.97	17.77	0.64	5.58	4.77	212	27.71	12.06	3.53	1.02	0.01	324.2	23.2335	158	58
197	7	2	57	0.21	41.3	1.796	1.311	0.5	1.71	166.4	8.13		8.03	1.03	57	0.52	0.073	1.81	2.55	7.34	152.6	5.55	29.9	76.6	0.369	17.29	1.46	5.43	7.06	243	29.5	28.34	4.46	1.33	0.01	318.8	32.0459	154	76
198	7	2	34	0.18	37.6	1.773	0.692	0.37	2.9	104.9	4.54		4.28	0.83	73	0.25	0.038	1.64	1.91	0.79	107.9	2.36	54.4	69.8	2.41	14.16	1.71	4.39	4.89	314	9.86	28.93	6.22	1.38	0.01	166.3	24.977	165	68
199	7	2	23	0.17	40.7	1.115	0.746	0.49	3.2	103.3	4.39		1.41	0.67	61	0.5	0.026	1.04	1.73	0.46	35.8	3	72.1	72.3	0.968	14.46	0.7	5.04	3.72	254	27.39	16.12	3.77	1.32	0.01	318.8	21.8871	171	64
200	7	2	47	0.07	45.6	1.68	0.68	0.27	2.6	185.1	5.18		1.07	0.91	62	0.37	0.021	1.89	2.07	0.68	19.8	2.9	92.9	72.2	2.78	14.87	0.69	4.4	5.55	200	16.5	16.1	4.89	1.31	0.01	429.3	20.7008	163	55
201	7	2	29	0.11	43.1	1.522	0.477	0.36	3.5	106	3.87		3.19	1.38	50	0.15	0.02	1.78	1.84	0.73	11.4	1.83	148.8	72.3	1.06	16.76	0.31	5.03	3.99	141	30.53	21.3	4.7	1.36	0.01	248.3	22.1367	166	61
202	7	2	24	0.14	44.5	1.453	0.485	0.43	10.1	111.8	3.25		0.54	1.73	66	0.2	0.02	1.33	1.95	0.57	23.5	1.61	89.6	72.8	2.02	15.69	0.61	4.61	3.84	278	33.85	16.22	3.03	1.09	0.01	315.7	21.3039	165	58
203	7	2	40	0.22	41.1	1.586	0.533	0.39	3.2	131.6	4.71		0.51	0.75	56	0.23	0.082	1.44	1.73	0.53	39.8	2.13	29.7	70	4.25	16.47	2.78	4.8	3.5	247	32.23	14.22	5.69	1.24	0.01	319.4	26.9274	168	76
204	7	2	25	0.08	45.8	1.742	0.798	0.34	1.8	107	4.81		5.55	0.87	59	0.44	0.024	1.46	1.85	1.25	44.3	2.78	15.3	79.9	2.68	14.7	1.35	4.41	5.27	295	22.21	26.85	4.72	1.27	0.01	265.4	27.6361	168	78
205	7	2	38	0.07	44.2	1.72	0.66	0.32	1.71	108.5	4.56		2.06	1.12	55	0.31	0.032	1.81	2.01	0.61	26.4	2.46	32.8	76.1	0.402	18.68	0.79	6.17	4.32	182	22.76	22.79	4.09	1.11	0.01	261.7	34.7222	168	98
206	7	2	42	0.07	39.8	1.892	0.715	0.23	1.71	82.1	4.8		0.39	0.89	77	0.13	0.02	1.82	1.83	0.63	7.4	2.67	65.5	62.2	0.967	16.34	0.96	4.03	5.21	251	11.99	24.38	4.5	1.12	0.01	282.9	22.5981	176	70
207	7	2	34	0.14	41.2	2.087	0.446	0.43	8.9	72.7	4.07		2.84	1.19	65	0.24	0.054	2.04	2.46	0.69	31.2	1.59	104.8	69.5	0.813	14.47	0.81	4.38	4.78	260	40.62	16.93	4.6	1.19	0.01	251.4	19.7133	173	59
208	7	2	22	0.13	38.7	1.901	0.483	0.31	4.7	97.2	3.82		0.21	0.88	57	0.08	0.02	1.66	1.73	0.73	12.2	1.72	110.9	68.3	2.93	17.16	0.89	4.84	2.97	204	16	31.11	4.1	1.24	0.01	348.4	19.9594	166	55
209	7	2	33	0.18	41.6	2.116	0.719	0.38	2.1	94	4.73		1.78	0.83	77	0.19	0.04	1.96	1.93	0.75	9.4	2.4	60.7	69.6	0.92	15.56	1	4.56	4.81	141	35.89	11.27	5.06	1.21	0.01	317.1	19.6052	172	58
210	7	2	23	0.16	39.5	1.86	0.698	0.45	1.8	124.3	4.84		6.02	1.23	67	0.18	0.049	1.75	2.07	0.48	13.4	2.59	43.3	65.4	1.07	13.13	1.48	4.31	3.79	294	15.48	17.02	3.9	1.45	0.01	372	24.6181	178	78
211	7	2	21	0.16	44.3	1.632	0.534	0.35	16.4	119.7	4.7		0.08	1.8	61	0.26	0.031	1.85	2.62	0.68	24	2.52	36.7	70.2	0.947	13.69	1.03	4.09	2.18	218	30.24	14.18	4.16	1.59	0.01	116.5	22.9854	172	68
212	7	2	20	0.14	42.3	1.32	0.508	0.32	4	133	3.77		0.28	0.8	56	0.2	0.023	1.37	2.34	0.5	24.6	1.97	17	68.1	0.508	13.52	0.92	3.99	5.09	195	32.59	21.56	7.43	1.39	0.01	167.6	24.4898	175	75
213	7	2	21	0.16	43.3	1.391	0.728	0.38	2.8	132	4.6		0.33	1.29	61	0.32	0.025	1.37	2.41	0.34	35.4	2.94	17.3	70.6	1.18	15.26	0.74	4.83	2.6	232	18.4	42.98	6.17	1.46	0.01	293.2	24.4646	163	65
214	7	2	18	0.1	46.9	1.482	0.521	0.27	4.8	128.5	3.7		0.12	0.79	55	0.29	0.037	1.23	1.98	0.44	53.5	1.96	30.1	74.5	1.95	18.3	1.48	5.37	3.85	230	46.06	27.95	6.44	1.27	0.01	203.5	22.4323	158	56
215	7	2	62	0.08	39.3	1.865	1.304	0.29	3.5	118.9	6.7		0.75	1.08	72	0.17	0.041	1.36	2.38	0.66	54.6	4.58	134.8	62.8	0.579	14.2	1.85	3.74	4.94	317	37.32	29.07	4.21	1.37	0.01	249.9	24.093	168	68
216	7	2	50	0.13	43.9	1.599	0.432	0.31	2.1	129.5	3.76		0.65	0.6	68	0.37	0.044	1.65	2.03	0.4	29.7	1.72	27.9	68.2	0.746	13.27	0.79	4.01	4.22	193	35.4	17.5	3.76	1.34	0.01	298.8	21.0772	163	56
217	7	2	23	0.14	42.8	2.034	0.531	0.46	1.71	77.4	4.31		4.75	0.94	59	0.4	0.065	1.94	3.01	0.25	32.8	1.83	43.2	72.5	1.59	13.94	1.48	4.76	4.03	214	14.26	34.12	3.81	1.37	0.01	219	24.0055	162	63
218	7	2	19	0.07	40.1	2.15	0.92	0.3	2.2	119.2	6.33		0.42	0.75	53	0.23	0.046	2.09	1.79	0.54	6.5	3.84	53.1	69.6	2.41	13.31	1.62	6.21	3.13	168	20.94	18.06	4.67	1.49	0.01	264.3	20.0692	170	58
219	7	2	31	0.17	39.5	1.424	0.934	0.4	1.9	96.7	5.03		3.8	1.24	85	0.54	0.052	1.18	2.18	0.53	163.4	3.5	129	65	1.2	13.6	1.11	3.91	3.97	226	16.36	17.42	3.12	1.25	0.01	209.8	22.8571	175	70
220	7	2	23	0.1	39.9	1.649	0.577	0.31	3.8	98.2	4.51		0.82	0.68	64	0.27	0.023	1.8	1.83	0.63	24.7	2.4	65.5	67.1	1.07	16.68	0.6	4.09	3.97	220	12.61	19.16	3.65	1.16	0.01	281.7	26.398	164	71
221	7	2	22	0.16	42.7	1.582	0.559	0.39	5.2	119.9	4.21		0.32	1.08	56	0.26	0.027	1.64	2.13	0.34	29.4	2.25	51	68.7	1.58	14.58	0.68	4.73	3.34	225	69.7	15	4.16	1.45	0.01	338.1	23.7253	155	57
222	7	2	23	0.14	42.2	2.282	0.65	0.41	5.7	123	5.29		3.84	2.01	57	0.22	0.087	2.07	2.12	0.52	82.6	2.36	103.6	66.2	1.91	14.89	2.66	5.38	4.32	211	24.96	19.46	3.67	1.64	0.01	234.4	20.3125	160	52
223	7	2	45	0.2	38.7	1.608	1.785	0.47	4	128.1	8.4		6.16	1.82	64	0.39	0.084	1.29	2.53	0.48	98.2	6.54	25.3	67.6	2.31	13.47	2.11	4.52	3.66	261	32.63	23.97	3.65	1.02	0.01	264.5	28.125	160	72
224	7	2	23	0.13	39.4	1.85	0.68	0.4	2.5	131.9	5.02		1.41	0.89	76	0.16	0.05	1.82	2	0.77	108.9	2.72	35.2	65.8	2.8	14.05	1.73	4.73	3.52	227	17.93	19.27	4.17	1.15	0.01	187.1	21.9525	176	68
225	7	2	29	0.22	40.4	1.399	0.703	0.52	2.1	150.9	4.46		4.54	0.58	67	0.39	0.09	1.17	2.31	0.43	77.9	2.86	96.7	68.6	1.17	14.5	1.44	4.86	3.43	305	38.79	15.34	4.46	1.23	0.01	208.8	39.0625	160	100
226	7	2	43	0.18	46.2	2.125	0.939	0.43	2.7	193.9	6.77		0.4	1	76	0.22	0.042	2.23	2.33	0.95	92.8	3.93	127.6	71.9	1.68	17.27	1.39	4.19	7.36	238	131	16.18	4.38	1.35	0.01	317.9	24.2188	160	62
227	7	2	46	0.12	43.9	1.952	1.074	0.4	5.5	133.7	6.14		0.25	2.55	84	0.23	0.029	1.64	2.99	0.51	46.8	4	43.2	66.8	2.82	14.84	1.96	4.19	4.09	226	10.5	17.03	4.5	1.36	0.01	266.7	24.539	164	66
228	7	2	49	0.12	43.9	1.897	0.57	0.31	6	98.9	4.27		0.45	0.57	61	0.69	0.036	1.91	2.01	0.33	42.2	1.96	106.3	70.9	1.42	14.36	0.89	4.62	4.46	278	28.45	27.86	4.78	1.27	0.01	291.9	15.9597	177	50
229	7	2	20	0.07	44.2	1.255	0.473	0.39	3	120	3.12		0.35	1.51	63	0.21	0.026	1.14	2.52	0.72	16.9	1.73	36.8	74.1	1.17	14.27	0.56	4.52	3.73	250	25.26	32.93	2.13	2.31	0.01	284.6	22.9481	167	64
230	7	2	24	0.15	44.2	1.449	0.861	0.43	3.8	104.4	4.83		3.49	1.97	69	0.22	0.032	1.23	2.29	0.72	39.9	2.94	55.1	75.1	2.05	13.39	1.75	4.65	3.13	270	15.1	22.48	2.12	1.57	0.01	298	23.1206	174	70
231	7	2	42	0.19	42.2	1.631	0.485	0.51	2.3	101.5	3.55		0.59	2.29	61	0.14	0.022	1.52	2.73	0.74	79.4	1.8	88.2	66.9	1.42	13.69	0.68	3.71	6.38	275	54.53	17.33	5.94	1.38	0.01	500.6	21.6311	158	54
232	7	2	25	0.26	43.4	1.38	0.946	0.51	3.8	121.8	4.88		11.23	1.2	76	0.12	0.027	1.08	2.02	0.71	27.6	3.19	104.6	68.4	1.59	19.09	1.46	5.72	3.31	321	22.1	14.4	3.38	1.12	0.01	241.7	26.8274	178	85
233	7	2	42	0.35	42.7	1.802	1.308	0.5	3.7	151.8	6.98		1.92	0.69	59	0.31	0.073	1.24	2.22	0.47	158.8	4.33	51.1	69.5	1.01	18.13	4.77	5.12	3.79	284	44.06	29.91	8.26	1.21	0.01	278.6	24.3865	162	64
234	7	2	24	0.19	41.4	1.374	0.572	0.42	5.8	77.9	3.69		0.39	1	60	0.11	0.021	1.39	2.44	0.55	25	2.18	62.3	67.9	0.891	15.27	0.54	4.48	4.11	251	11.04	16.44	4.26	1.4	0.01	227.2	18.8324	177	59
235	7	2	26	0.13	40.6	1.683	0.701	0.35	3.3	84.2	4.52		1.49	0.68	73	0.24	0.02	1.51	2.19	0.6	23.5	2.54	69.7	70.2	1.4	17.02	1.44	4.84	4.54	219	17.2	14.5	4.39	1.18	0.01	219.6	21.6296	176	67
236	7	2	31	0.08	44.7	1.193	0.836	0.33	4.2	122.3	4.83		0.7	0.81	53	0.39	0.029	1.04	3.2	0.87	44.3	3.28	21.2	74.3	0.994	17.11	1.69	4.65	3.63	149	50.92	37.83	4.55	1.32	0.01	187.9	18.2531	172	54
237	7	2	20	0.09	46	1.529	0.505	0.28	1.9	113.1	3.83		0.54	0.82	50	0.22	0.023	1.45	1.76	0.54	16.4	2.12	40.6	74.2	1.35	17.76	0.83	4.91	3.37	177	58.62	24.77	4.39	1.61	0.01	421.3	19.9573	169	57
238	7	2	22	0.17	39.5	1.277	0.432	0.37	1.71	72.2	2.62		0.41	0.93	50	0.26	0.044	1.17	2.16	0.46	35	1.22	118.1	65.9	0.915	17.73	1.1	4.28	2.51	182	13.07	21.64	3.84	1.39	0.01	280.4	18.1449	166	50
239	7	2	43	0.21	44.3	2.016	0.678	0.44	8.2	115.3	4.98		0.41	0.64	63	0.22	0.042	2.05	1.98	0.58	16	2.6	26.6	76.5	1.18	15.16	0.88	4.4	4.88	198	4.31	13.34	5.06	1.4	0.01	360.5	24.8358	158	62
240	7	2	23	0.14	40.5	2.201	0.599	0.38	2.6	114	4.45		7.42	1.17	54	0.21	0.022	2.06	2.11	0.53	34.9	1.91	48	76.3	2.03	16.12	1.44	4.59	3.99	228	11.6	17.31	5.6	1.1	0.01	302.8	21.6333	172	64
241	7	2	48	0.14	40.4	1.562	1.04	0.34	1.71	126.4	5.35		8.94	0.64	50	0.24	0.031	1.29	1.83	0.3	26.3	3.77	167.8	68.6	1.03	14.31	1.21	4.94	4.4	184	14.09	18.55	4.27	1.21	0.01	217.5	29.5159	154	70
242	7	2	21	0.23	43.5	1.728	0.571	0.45	3	133	4.47		0.25	2.25	68	0.35	0.031	1.51	2.72	0.39	48.1	2.41	66.5	74.2	1.7	14.8	2.48	4.69	5.92	289	54.63	33.87	4.34	1.54	0.01	245.2	25.3086	180	82
243	7	2	45	0.37	41.5	1.321	1.006	0.84	1.71	140.8	5.65		2.66	3.22	70	3.65	0.282	1.24	2.97	0.29	44.2	4.2	290.1	76.6	1.59	14.52	1.46	4.98	6.17	297	10.56	40.71	4.62	1.69	0.01	277.4	32.8125	160	84
244	7	2	21	0.17	41.4	1.442	0.597	0.45	3.8	131	3.69		0.45	1.94	68	0.14	0.041	1.21	2.11	0.82	66.9	2.08	72.9	71.1	1.51	15.35	0.97	5.1	3.07	187	8.46	34.42	3.78	1.08	0.01	244.8	22.2656	160	57
245	7	2	25	0.1	45.5	1.551	0.394	0.45	2.9	107.1	3.43		0.4	1.3	60	0.36	0.045	1.36	2.28	0.94	16.6	1.47	28.3	76.1	1.81	17.73	1.35	4.41	3.67	355	20.04	32.95	2.51	1.37	0.01	158.8	21.4691	174	65
246	7	2	25	0.13	43.9	2.301	0.791	0.38	2.7	117.9	5.47		5.88	1.06	59	0.2	0.03	2.01	2.14	0.54	29.3	2.67	126.5	74.4	0.971	14.59	2.01	4.68	5.01	198	28.48	25.27	3.21	1.16	0.01	259	21.2228	179	68
247	7	2	37	0.13	41.3	1.853	0.667	0.43	3.2	125.4	5.03		0.52	1.97	64	0.16	0.029	1.94	2.05	0.69	11.2	2.75	48.3	67.8	0.875	16.67	0.85	4.24	5.04	230	13.96	17.9	5.74	1.2	0.01	278.9	21.9671	168	62
248	7	2	26	0.1	40.1	1.943	0.416	0.36	1.71	98.6	3.66		4.21	1.35	67	0.21	0.052	2.05	2.08	0.46	53.4	1.35	54	73.1	0.856	13.11	0.66	4.35	2.81	240	14.05	31.41	4.25	1.32	0.01	380.9	21.0772	163	56
249	7	2	26	0.4	39.8	1.433	0.817	0.5	10.4	143.2	5.09		2.45	0.59	61	1.62	0.245	1.34	2.05	0.37	59.4	3.23	60.8	64	2.38	13.78	1.19	4.49	3.65	216	37.8	26.51	4.18	1.26	0.01	173.2	42.9688	160	110
250	7	2	44	0.09	41.8	1.499	0.418	0.39	2	108.3	3.21		0.76	1.92	46	0.35	0.036	1.54	3.09	0.17	29.8	1.37	141.6	70.4	0.76	15.82	0.64	4.31	4.27	305	8.6	27.1	3.99	1.24	0.01	107.1	25.9516	170	75
251	7	2	23	0.11	42	2.113	0.488	0.53	2.5	90.4	3.79		10.34	4.06	65	0.13	0.039	1.84	1.86	0.87	55.1	1.44	57.5	71.8	1.9	13.74	2	3.89	4.43	251	11.62	15.19	7.2	1.07	0.01	168.5	23.1834	170	67
252	7	2	24	0.1	40.4	1.15	0.62	0.32	2.1	83.8	3.97		3.23	0.8	61	0.19	0.022	1.17	2.35	0.49	46.6	2.38	56	65.5	1.87	14.83	0.87	4.19	4.38	194	38.26	18.04	4.79	1.47	0.01	686.8	23.6244	162	62
253	7	2	32	0.18	43.1	1.515	0.526	0.49	2.2	96.9	3.96		0.64	1.37	66	0.23	0.057	1.52	2.26	0.47	31.3	1.99	39.7	72.9	0.784	20.1	1.17	4.89	5.71	242	30.2	22.15	4.39	1.59	0.01	311.6	23.597	171	69
254	7	2	40	0.14	44.5	1.58	0.52	0.39	2	103	4.07		0.42	1	58	0.3	0.032	1.65	1.64	0.31	26.5	2.29	77	74.1	1.8	19	0.65	4.52	2.7	219	24.99	11.88	4.19	1.43	0.01	225.8	20.0288	158	50
255	7	2	28	0.1	39.2	1.8	0.43	0.29	2	144.2	3.83		1.89	0.88	64	0.31	0.042	1.77	1.68	0.81	40.9	1.66	31.8	68.9	0.776	20.35	1.26	6.1	6.15	245	50.25	26.42	3.3	1.37	0.01	340.5	28.4055	178	90
256	7	2	24	0.11	46.9	1.51	0.74	0.43	10.4	156.9	5.04		0.33	1.42	65	0.19	0.023	1.53	2.46	0.4	29.5	3.2	11	74.5	0.832	19.92	0.82	5.47	3.41	186	17.7	17.11	5.22	1.43	0.01	258.6	26.9531	160	69
257	7	2	36	0.07	44.5	1.65	0.6	0.29	3.1	100.8	4.85		0.71	1.01	57	0.17	0.046	1.56	1.77	0.46	100.9	2.68	35.4	75.4	1.28	15.41	1.86	5.53	4.42	275	20.77	25.38	3.65	1.29	0.01	286.5	21.9899	161	57
258	7	2	21	0.09	41.9	1.42	0.59	0.3	2.3	92.6	3.99		0.97	0.33	51	0.31	0.033	1.43	1.74	0.47	61.9	2.17	22.7	68.8	1.92	17.17	0.79	4.6	3.65	145	20.04	10.82	4.88	1.28	0.01	167.8	22.2137	153	52
259	7	2	34	0.1	40.2	1.6	0.96	0.31	3.3	115.4	5.16		2.27	0.99	66	0.33	0.047	1.57	1.63	0.44	34.7	3.1	63.3	70.7	2.28	18.05	1.02	4.1	4.41	173	14	12.64	4.55	1.28	0.01	367	22.5896	167	63
260	7	2	25	0.1	42.8	2.25	0.73	0.3	2.4	102.7	5.44		2.91	0.69	52	0.24	0.027	2.54	2.12	0.5	43	2.63	25.8	71.4	1.34	15.8	0.76	4.54	3.89	241	23.56	26	4.08	1.22	0.01	276.6	20.5499	168	58
261	7	2	26	0.13	48	1.61	0.92	0.36	4.7	131.5	5.98		0.24	0.73	62	0.28	0.04	1.79	1.85	0.6	36.6	3.86	75	79.4	2.14	18.19	0.84	5.24	4.37	224	45.23	18.63	4.87	1.26	0.01	158.6	21.1553	167	59
262	7	2	24	0.19	41.6	1.5	0.88	0.21	1.71	117.7	5.48		4.56	0.69	59	0.35	0.051	1.23	2.03	0.54	5	3.47	54.8	71.9	1.36	16.69	1.92	5.76	3.21	195	17.15	23.86	4.21	1.18	0.01	361.4	21.2585	168	60
263	7	2	21	0.19	45.8	1.6	0.37	0.34	7.4	111.9	3.62		0.13	1.2	65	0.23	0.026	1.82	2.25	1.1	32.9	1.52	25.3	73.8	1.3	14.65	0.55	5.19	3.28	279	26.85	27.54	3.16	1.35	0.01	551.8	19.3792	173	58
264	7	2	34	0.26	42.1	2.01	0.51	0.56	1.71	138	4.19		2.96	1.09	54	0.34	0.029	2	2.6	0.51	14.1	1.69	54	73.4	1.04	15.02	0.84	4.1	5.55	151	74.3	24.67	6.22	1.1	0.01	461.9	19.9573	169	57
265	7	2	26	0.28	42	1.91	0.31	0.5	2.1	129.8	3.33		2.76	0.72	62	0.31	0.022	1.9	1.95	0.53	9.7	0.92	41.6	69.8	2.28	16.26	1.28	5.25	4.62	174	28.7	21.39	3.82	1.32	0.01	271.9	18.4965	174	56
266	7	2	35	0.26	41.2	2.01	0.78	0.48	1.71	69.6	4.71		2.14	0.85	65	0.29	0.022	1.78	1.71	0.75	6.5	2.43	56	70.2	0.596	13.11	1.31	4.79	4.07	189	13.91	29.31	4.86	1.04	0.01	377.3	23.5883	166	65
267	7	2	30	0.3	42.8	1.49	0.53	0.48	3.2	97.2	4.36		1.23	0.79	77	0.12	0.021	1.64	2.05	0.53	37.1	2.38	44.9	70.4	1.66	16.98	0.71	5.67	4	236	23.15	26.35	4.35	1.4	0.01	230.3	22.5069	152	52
268	7	2	28	0.26	43.8	1.3	0.61	0.46	3.1	137.5	4.22		0.26	0.85	46	0.15	0.028	1.43	2.47	0.67	37.6	2.5	90	72.1	1.47	14.51	0.83	4.77	4	132	6.98	26.17	4.18	1.38	0.01	413.2	22.0932	178	70
269	7	2	23	0.2	37.2	2.11	0.44	0.57	2.2	97.4	4.03		5.14	1.32	58	0.18	0.043	2.17	1.78	0.65	16.6	1.4	181	66.5	1.46	15.15	1.41	5.7	4.68	192	8.9	11.72	4.53	1.37	0.01	214.8	21.4533	170	62
270	7	2	21	0.2	43.6	2.54	0.45	0.43	3.1	67.4	4.73		2.22	1.11	57	0.23	0.02	2.86	2.22	0.54	5	1.41	23.4	72.7	5.29	13.51	0.92	5.56	4.5	212	37.59	29.48	4.05	1.31	0.01	384.1	19.7232	170	57
271	7	2	29	0.17	43	1.69	0.47	0.31	2.7	100.4	4.42		0.19	1.01	51	0.24	0.039	2.03	2.52	1.01	12.2	2.07	56	65.9	1.2	14.64	1.12	4.16	3.71	175	11.48	17.36	3.85	1.58	0.01	307.1	20.202	165	55
272	7	2	46	0.26	42.4	1.85	0.89	0.56	2.4	171.6	5.79		0.56	0.87	57	0.18	0.065	1.88	2.06	0.65	73.5	3.18	40.6	73.6	0.722	15.29	1.76	4.11	4.21	314	25.51	15.71	5.38	1.41	0.01	221.6	22.4913	170	65
273	7	2	23	0.27	44.6	1.9	1.09	0.48	4.9	92.2	6.88		0.51	1.22	57	0.27	0.032	1.99	2.11	0.54	21.8	4.44	54	76.9	1.39	17.19	1.02	5.34	4.09	209	47.98	12.71	4.05	1.17	0.01	385.7	20.7157	173	62
274	7	2	37	0.18	44.3	1.59	0.55	0.54	3.7	140.8	3.62		0.15	0.83	64	0.21	0.035	1.67	1.87	0.43	63.3	1.86	82.1	71.8	0.83	20.8	0.59	5.52	4.33	198	54.2	16.63	4.68	1.29	0.01	232	21.6333	172	64
275	7	2	22	0.16	45.9	1.61	0.72	0.36	4	144.1	4.22		1.41	0.93	72	0.35	0.049	1.35	1.6	0.48	46.4	2.4	46.5	78.7	1.64	19.24	1.65	4.99	4.88	270	22.24	19.73	4.03	1.35	0.01	423.5	20.4284	177	64
276	7	2	22	0.21	43.6	1.63	0.57	0.44	4.2	134.3	3.98		0.24	0.85	60	0.22	0.031	1.56	1.87	0.61	12.4	2.25	52.5	71.4	1.39	18.58	0.72	5.34	3.52	257	36.54	17.53	4.96	1.58	0.01	269.9	23.1481	180	75
277	7	2	22	0.16	40.6	1.87	0.75	0.33	2.3	100.8	4.86		0.72	0.95	70	0.19	0.044	1.52	1.54	0.48	57.4	2.56	51.5	75.1	1.63	16.17	2.45	4.72	4.76	235	39.85	18.6	3.85	1.42	0.01	296.5	22.8571	175	70
278	7	2	23	0.2	42.4	2.4	0.7	0.4	2	94.4	5.41		4.05	1.14	59	0.25	0.049	2.38	2.15	0.44	5	2.59	49.9	71.8	2.05	16.46	0.92	5.46	3.53	170	16.04	17.21	4.08	1.47	0.01	315.1	21.7993	170	63
279	7	2	20	0.11	39.7	2.49	0.66	0.34	1.71	101.8	5.99		0.72	0.68	56	0.27	0.024	2.88	1.87	0.66	35	2.91	8.8	70.8	1.89	16.83	0.79	4.72	5.29	175	12.12	34.18	6.6	1.63	0.01	346.4	19.9573	169	57
280	7	2	45	0.1	49.9	1.88	1.06	0.34	3.4	117.4	6.2		0.3	0.95	53	0.21	0.032	1.79	1.79	1.37	93.7	3.98	106.2	74.4	1.01	15.63	1.32	4.77	3.53	106	109.3	30.28	4.72	1.45	0.01	293.1	22.1003	162	58
281	7	2	47	0.26	46	2.04	1.08	0.66	10	95	6.18		0.38	2.99	117	0.21	0.046	1.68	3.85	1.58	166.6	4.3	96.3	79	1.64	15.8	1.18	4.43	4.72	420	25.29	20.6	5.83	1.31	0.01	311.7	21.1553	167	59
282	7	2	37	0.08	37.4	2.13	0.78	0.22	1.71	93.1	5.62		1.72	0.83	71	0.16	0.035	1.99	2.21	0.31	11.2	2.97	99.2	65	1.15	14.81	1.69	4.35	4.15	168	7.09	13.31	3.32	1.28	0.01	286	21.2953	172	63
283	7	2	25	0.14	41.2	2.013	0.567	0.37	6	59.5	4.24		0.42	1.19	57	0.22	0.039	1.69	2.13	0.5	27.3	2.06	148	65.4	1.72	16.76	1.35	5.3	3.42	193	29.25	12.83	4.79	1.48	0.01	195.1	22.2041	175	68
284	7	2	21	0.12	40.4	2.037	0.486	0.38	1.71	69.6	4.31		1.76	0.85	41	0.17	0.02	2	2.56	0.59	13.9	1.79	26	71.6	0.632	17.12	1.26	5.16	1.89	121	3.9	18.68	4.03	1.55	0.01	759.2	19.7055	164	53
285	7	2	25	0.14	38.4	1.626	0.825	0.33	2.2	105.9	4.53		2.03	0.77	52	0.12	0.02	1.33	1.59	0.39	22.7	2.79	87.3	66.1	3.5	15.61	1.69	6.31	3.01	206	26.36	15.49	3.8	1.28	0.01	252.4	20.2812	172	60
286	7	2	22	0.25	40	1.676	0.829	0.41	1.71	124.1	4.5		3.58	0.79	44	0.26	0.043	1.31	1.97	0.42	28.1	2.61	33	67.2	1.53	17.02	1.62	5.29	3.05	151	14.02	37.57	6	1.23	0.01	364.3	19.8347	165	54
287	7	2	23	0.24	41	2.076	0.897	0.44	3.8	59.2	5.14		3.22	1.24	50	0.16	0.023	1.7	2.38	0.79	5	3.18	68	70.1	0.66	13.16	1.52	4.81	3.78	154	32.68	15.38	4.19	1.26	0.01	358.5	19.4932	171	57
288	7	2	24	0.19	43.6	1.412	0.561	0.37	6.5	103.9	3.75		0.34	0.44	57	0.15	0.041	1.52	2.29	0.35	27	2.16	33.1	73.6	2.75	17.97	0.56	5.48	2.62	205	27.07	17.62	4.55	1.14	0.01	333.9	24.7676	162	65
289	7	2	22	0.15	41.7	1.662	1	0.37	2.1	115.8	5.14		3.41	1.98	57	0.22	0.022	1.26	2.44	0.24	54.2	3.39	73.1	73.1	1.14	17.8	1.68	4.34	3.04	178	5.18	22.78	3.34	1.05	0.01	311.8	22.7204	173	68
290	7	2	19	0.27	43.9	2.141	0.965	0.29	5.6	123.3	6.49		1.42	0.67	53	0.15	0.028	1.94	1.77	0.57	156.4	3.84	11.8	74.9	1.09	17.22	2.72	5.94	3.37	165	2.79	19.69	5.2	1.68	0.01	177.2	24.0346	158	60
291	7	2	36	0.19	42.6	1.685	0.722	0.35	10.5	118.3	4.55		0.25	0.71	57	0.14	0.02	1.48	1.91	0.52	16	2.66	98	69.8	1.36	15.67	1.14	4.81	4.4	162	43.57	18.09	3.74	1.42	0.01	246.3	27.9904	168	79
292	7	2	18	0.17	39.6	2.232	0.693	0.39	2.8	123.2	4.88		5.87	1.1	55	0.14	0.035	1.99	2.19	0.49	22.9	2.49	69.4	70.9	1.22	15.11	1.41	6.2	3	262	36.99	23.98	4.67	1.13	0.01	100.4	26.7759	157	66
293	7	2	23	0.21	41.4	1.779	0.811	0.44	1.71	111.9	4.67		5.97	1.23	57	0.15	0.045	1.35	2.05	0.63	34.4	2.96	48.2	74.3	1.88	13.91	1.2	4.9	4.82	159	11.92	29.6	5.04	1.46	0.01	151.3	20.7612	170	60
294	7	2	23	0.28	44.5	2.053	0.827	0.55	7.4	101.7	5.13		2.68	1.59	76	0.12	0.047	1.87	2	0.51	44.1	3.08	35	78.5	11.19	15.44	0.87	5	4.09	192	36.36	11.57	5.28	1.29	0.01	478.6	25	180	81
295	7	2	33	0.09	41	1.86	0.56	0.36	1.71	101.8	4.46		1.22	1.3	72	0.17	0.02	1.79	2.32	0.44	21.6	2.3	91	66.6	1.67	13.41	1.08	4.41	3.73	192	22.87	16.15	3.72	0.97	0.01	308.3	25.0762	161	65
296	7	2	36	0.29	44.6	1.924	0.766	0.45	2.1	120	4.65		8.92	0.96	55	0.22	0.054	1.39	2.37	0.98	113.6	2.43	91.8	72.1	1.59	18.82	2.51	4.29	3.08	191	35.15	29.66	8.87	1.29	0.01	160.1	23.3887	173	70
297	7	2	51	0.27	42.9	2.196	0.977	0.5	1.71	103	5.83		1.59	1.68	63	0.09	0.038	1.73	2.16	0.5	90.4	3.58	38.6	75.2	0.9	17.5	1.88	5.94	5.75	189	46.59	7.81	4.91	1.5	0.01	235.9	22.8374	170	66
298	7	2	36	0.41	44.8	1.441	0.859	0.62	2.6	153.9	5.09		2.6	2.8	51	0.53	0.054	1.2	2.02	0.61	43.8	3.43	56.2	76.9	3.35	15.13	1.59	5.21	3.63	283	90.34	14.81	5.03	1.47	0.01	94.8	22.0386	165	60
299	7	2	23	0.14	41.2	1.957	0.586	0.35	3.4	123.2	4.21		2.39	1.48	54	0.31	0.031	1.97	1.91	0.61	7.6	1.95	36.7	72.7	1.51	16.16	1.06	5.21	3.34	254	14.42	20.44	4.72	1.16	0.01	199.9	21.7993	170	63
300	7	2	26	0.28	42	1.848	1.138	0.37	3.7	154.7	5.95		12.06	0.6	49	0.26	0.088	1.42	1.93	0.25	45.3	3.71	76.9	74.2	1.13	19	2.44	7.08	5.08	189	55.37	14.55	4.77	1.23	0.01	350.9	27.0416	172	80
301	7	1	30									28.8
302	7	1	27									32.5
303	7	1	34									28
304	7	1	29									26.5
305	7	1	38									29.9
306	7	1	22									28.6
307	7	2	40									27.4
308	7	2	26									24.2
309	7	2	26									25.5
310	7	2	29									29.9
311	7	2	31									25.6
312	7	2	33									30.7

## Sheet: Legend
Species
1	Rhesus macaques samples collected at the German Primate Center, Göttingen, Germany	Macaca mulatta
2	Bonobo samples collected at the Lola Ya Bonobo Sanctuary, Kinshasa, Democratic Republic of the Congo	Pan paniscus
3	Bonobo samples collected at the Leipzig Zoo, Leipzig, Germany	Pan paniscus
4	Central African chimpanzee samples collected at the Tchimpounga Sanctuary,Pointe Noire, Republic of Congo	Pan troglodytes troglodytes
5	West African chimpanzee samples collected at the Tacugama Sanctuary, Freetown, Sierra Leone	Pan troglodytes verus
6	West African chimpanzee samples collected at the Leipzig Zoo, Leipzig, Germany	Pan troglodytes verus
7	Human samples collected at the University Hospital Leipzig, Leipzig, Germany	Homo sapiens
Gender
1	male
2	female
